# Supplementary material for: Gene–environment interaction involved in cholangiocarcinoma in the Thai population: polymorphisms of DNA repair genes, smoking and use of alcohol
Source: PubMed Central journal article supplement — BMJ Open. 2014 Oct 21;4(10):e005447. doi: 10.1136/bmjopen-2014-005447 (PMC4208049; doi:10.1136/bmjopen-2014-005447), 2014-10-21
Supplement: bmjopen-2014-005447.draft_revisions.pdf [file bmjopen-2014-005447.draft_revisions.pdf]

# BMJ Open

## Gene-environment interaction involved in cholangiocarcinoma in Thai population: polymorphisms of DNA repair genes, smoking and use of alcohol

|                                 |                                                                                                                                                                                                                                                                                                                                                                                                                                                                                                                                                                                                           |
|---------------------------------|-----------------------------------------------------------------------------------------------------------------------------------------------------------------------------------------------------------------------------------------------------------------------------------------------------------------------------------------------------------------------------------------------------------------------------------------------------------------------------------------------------------------------------------------------------------------------------------------------------------|
| Journal:                        | <i>BMJ Open</i>                                                                                                                                                                                                                                                                                                                                                                                                                                                                                                                                                                                           |
| Manuscript ID:                  | bmjopen-2014-005447                                                                                                                                                                                                                                                                                                                                                                                                                                                                                                                                                                                       |
| Article Type:                   | Research                                                                                                                                                                                                                                                                                                                                                                                                                                                                                                                                                                                                  |
| Date Submitted by the Author:   | 09-Apr-2014                                                                                                                                                                                                                                                                                                                                                                                                                                                                                                                                                                                               |
| Complete List of Authors:       | Songserm, Nopparat; Ubon Ratchathani Rajabhat University, Department of Community Health, Faculty of Public Health<br>Promthet, Supanee; Khon Kaen University, Department of Epidemiology, Faculty of Public Health<br>Pientong, Chamsai; Khon Kaen University, Department of Microbiology, Faculty of Medicine<br>Ekalaksananan, Tipaya; Khon Kaen University, Department of Microbiology, Faculty of Medicine<br>Chopjitt, Peechanika; Khon Kaen University, Department of Microbiology, Faculty of Medicine<br>Wiangnon, Surapon; Khon Kaen University, Department of Paediatrics, Faculty of Medicine |
| <b>Primary Subject Heading</b>: | Epidemiology                                                                                                                                                                                                                                                                                                                                                                                                                                                                                                                                                                                              |
| Secondary Subject Heading:      | Epidemiology, Public health                                                                                                                                                                                                                                                                                                                                                                                                                                                                                                                                                                               |
| Keywords:                       | EPIDEMIOLOGY, Epidemiology < ONCOLOGY, PUBLIC HEALTH                                                                                                                                                                                                                                                                                                                                                                                                                                                                                                                                                      |
|                                 |                                                                                                                                                                                                                                                                                                                                                                                                                                                                                                                                                                                                           |

SCHOLARONE™  
Manuscripts

1  
2  
3 **Gene-environment interaction involved in cholangiocarcinoma in Thai population:**  
4  
5 **polymorphisms of DNA repair genes, smoking and use of alcohol**  
6  
7  
8  
9

10 **Corresponding author:**

11  
12 Professor Supanee Promthet, Department of Epidemiology, Faculty of Public Health, Khon  
13  
14 Kaen University, Khon Kaen, 40002, Thailand

15  
16 Phone: +66(0) 43-347057; Fax +66(0) 43-347058; E-mail: supanee@kku.ac.th  
17  
18  
19  
20  
21  
22

23 **Author names:**

24  
25 Nopparat Songserm,<sup>1</sup> Supanee Promthet,<sup>2</sup> Chamsai Pientong,<sup>3</sup> Tipaya Ekalaksananan,<sup>3</sup>  
26  
27 Peechanika Chopjitt,<sup>3</sup> Surapon Wiangnon,<sup>4,5</sup>  
28  
29  
30  
31  
32

33 **Author affiliations:**

34  
35 <sup>1</sup>Department of Community Health, Faculty of Public Health, Ubon Ratchathani Rajabhat  
36  
37 University, Thailand

38  
39 <sup>2</sup>Department of Epidemiology, Faculty of Public Health, Khon Kaen University, Thailand

40  
41 <sup>3</sup>Department of Microbiology, Faculty of Medicine, Khon Kaen University, Thailand

42  
43 <sup>4</sup>Department of Paediatrics, Faculty of Medicine, Khon Kaen University, Thailand

44  
45 <sup>5</sup>Cancer Unit, Faculty of Medicine, Khon Kaen University, Thailand  
46  
47  
48  
49  
50

51 **Keywords:** Cholangiocarcinoma, Polymorphisms, DNA repair genes, Smoking, Alcohol  
52  
53 drinking  
54  
55

56 **Word count:** 2551 words  
57  
58  
59  
60

## ABSTRACT

**Objective:** Cholangiocarcinoma (CCA) is the most common malignancy in a Northeast Thai population. Smoking and alcohol drinking are associated with production of free radical intermediates, which can cause several types of DNA lesions. Reduced repair of these DNA lesions would constitute an important risk factor for cancer development. We therefore examined that whether polymorphisms in DNA base-excision repair (BER) genes, *XRCC1* G399A and *OGG1* C326G, were associated with CCA risk and whether they modified the effect of smoking and alcohol drinking in Thai population.

**Design:** A nested case-control study within cohort study was conducted: 219 subjects with primary CCA were each matched with two non-cancer controls from the same cohort on sex, age at recruitment and presence/absence of *Opisthorchis viverrini* eggs in stools. Smoking and alcohol consumption were assessed on recruitment. Polymorphisms in BER genes were analyzed using a polymerase chain reaction with high resolution melting analysis. The associations were assessed using conditional logistic regression.

**Results:** Our results suggest that in Thai population polymorphisms in *XRCC1* and *OGG1* genes, particularly in combination, are associated with increased susceptibility to CCA, and that their role as modifiers of the effect of smoking and alcohol consumption influences the risk of CCA.

**Conclusions:** Better ways of reducing habitual smoking and alcohol consumption, targeted toward subgroups which are genetically susceptible, are recommended. CCA is multi-factorial disease, and a comprehensive approach is needed for its effective prevention. This approach would also have the additional advantage of reducing the onset of other cancers.

### Strengths and limitations of this study

- This was a nested case-control study within the cohort study. This design minimises recall bias of cigarette smoking and alcohol drinking, as subjects were interviewed at the time of recruitment, before case or control status was defined. It is advantage for examining the role of self-reported factors such as cigarette smoking and alcohol drinking, which are modified when cancer is present.
- Only some cholangiocarcinoma cases were histological confirmed diagnosis.
- This study did not include population aged 70 years and above.

## INTRODUCTION

The data from GLOBOCAN 2008 shows that liver cancer is the fourth most common cause of death from cancer worldwide.<sup>1</sup> It is the most common cancer in Northeast Thailand, where the great majority of cases are cholangiocarcinomas (CCA).<sup>2</sup> Data from the Khon Kaen Cancer Registry (KKCR) have shown that the estimated age-standardised incidence rates for men and women are 84.6 and 36.8 per 100 000, respectively.<sup>3</sup>

Among several types of DNA damage induced by carcinogens from tobacco and alcohol are oxidative base damage and single-strand breaks, which are repaired by the base-excision repair pathway (BER).<sup>4</sup> Genetic variants and polymorphisms in DNA repair pathways have been reported to affect the levels of DNA lesions, which accumulate in the epithelial tissue of the hepatobiliary tract system, thus influencing the susceptibility to biliary tract cancers and stones in a Chinese population<sup>5, 6</sup> and gallbladder cancer in an Indian population.<sup>7</sup> No studies on this topic in relation to CCA have been conducted in a Thai population, but there have been studies, which clarify the role of the accumulation of levels of oxidative DNA lesions in liver fluke-infected- and CCA patients<sup>8, 9</sup>; these studies concluded that some biomarkers from oxidative DNA lesions induced by liver fluke infection – a major risk factor – may play an important role in CCA development. However, the results from our previous study showed that not only liver fluke infection but also certain lifestyle and dietary co-factors were associated with increased risk of CCA.<sup>10, 11</sup> Long-term smoking<sup>12, 13</sup> and alcohol drinking<sup>4, 14, 15</sup> are associated with production of free radical intermediates, which can cause several kinds of DNA lesions. Reduced repair of these DNA lesions would constitute an important risk factor for cancer development. With respect to genetic factors, a number of polymorphisms in various DNA repair genes have been discovered, and it is possible that these polymorphisms may affect DNA repair capacity and thus modulate susceptibility to cancer. Investigations are therefore needed into the different patterns of

1  
2  
3 smoking and alcohol drinking in relation to susceptibility to CCA, along with DNA repair  
4 capacity induced by genetic variations or polymorphisms.  
5  
6

7  
8 Although cigarette smoking was not associated with CCA development in the previous  
9 studies conducted in Thailand<sup>11, 16-19</sup> and elsewhere,<sup>20</sup> a modifying effect by DNA repair genes  
10 remains a possibility. With respect to the use of alcohol, this was related to a substantially  
11 increased risk of CCA in our previous study.<sup>11</sup> At the molecular level, it is known that single-  
12 nucleotide polymorphisms (SNPs) in genes participate biochemically in the base-excision repair  
13 pathway (X-ray repair cross-complementing group 1: *XRCC1* and 8-oxoguanine DNA  
14 glycosylase 1: *OGG1*), which repairs smoking- and alcohol-induced oxidative DNA base  
15 modifications.<sup>4</sup>  
16  
17  
18  
19  
20  
21  
22  
23  
24  
25

26  
27 In this present study, we therefore investigated whether polymorphisms in DNA base-  
28 excision repair genes (*XRCC1* G399A and *OGG1* C326G) are associated with CCA risk and  
29 whether their effects are modified by cigarette smoking and alcohol drinking in a Northeastern  
30 Thai population residing in a high-incidence area of opisthorchiasis-related CCA. The selection  
31 of these SNPs was based on their putative effect on protein function and/or previous evidence of  
32 associations with the risk of hepatobiliary tract cancers.<sup>5-7</sup>  
33  
34  
35  
36  
37  
38  
39  
40  
41  
42

## 43 MATERIALS AND METHODS

### 44 Study subjects

45  
46 This was a case-control study nested within the 23 584 Khon Kaen Cohort Study (KKCS).  
47  
48 Details of the KKCS and the selection of CCA cases and controls used in the present study have  
49 been previously reported.<sup>10, 11, 21</sup> Briefly, 219 cohort members who had developed a primary  
50 CCA, diagnosis at least by ultrasound, with or without contrast radiology, tumour markers (such  
51 as CA19-9) or histopathology, six or more months after enrollment were identified. The vital  
52  
53  
54  
55  
56  
57  
58  
59  
60

1  
2  
3 status and date of death of potential cases were ascertained by linkage to the files of deaths in  
4 Thailand, which are held in the database of the National Health Security Office and the  
5 demographic database of Ministry of Interior. All cases had died within two years of diagnosis.  
6  
7  
8 Two non-cancer controls from the same cohort population were randomly selected for matching  
9  
10 with each case on sex, age at recruitment ( $\pm 3$  years) and presence/absence of liver fluke eggs in  
11  
12 the faeces at recruitment (detected by the formalin ethyl acetate concentration technique). This  
13  
14 research was approved by the Khon Kaen University Ethics Committee for Human Research  
15  
16 (Reference No. HE512053).  
17  
18  
19  
20  
21  
22  
23

### 24 **Assessment of cigarette smoking and alcohol drinking**

25  
26  
27 A smoker was defined as someone who had ever smoked any type of cigarette on a daily  
28  
29 basis.  
30

31  
32 Ever drinkers were defined as those who consumed at least one type of alcoholic beverage  
33  
34 (beer, *Sato*, white whisky, red whisky and other whiskies) at least once a month; those drinking  
35  
36 less than this were defined as non-drinkers. The consumption of each subject was calculated in  
37  
38 terms of units of alcohol, where a unit corresponds to 10 ml (approximately 8 gm) of ethanol.  
39  
40 The number of units of alcohol in a drink was determined by multiplying volume of the drink (in  
41  
42 milliliters) by its alcohol percentage (beer 5.0%, *Sato* 7.0%, white whisky 40%, red whisky 35%)  
43  
44 and dividing by 1000. Drinkers were dichotomized according to units of alcohol consumed per  
45  
46 month on the basis of the median monthly consumption for the controls.  
47  
48  
49  
50  
51  
52

### 53 **Laboratory methods**

#### 54 ***Specimen collection and DNA extraction***

55  
56  
57  
58  
59  
60

1  
2  
3 Blood samples (buffy coat) were available for 175 (80%) of the 219 eligible CCA cases;  
4  
5 specimens were retrieved from the KKCS bio-bank for these cases and for the 350 matched  
6  
7 controls. Genomic DNA was extracted from buffy coat fractions using the standard protocols of  
8  
9 Genomic DNA Mini Kit with Proteinase K (Geneaid Biotech). Of those with DNA samples,  
10  
11 genotyping was successfully carried out for 95% (499 out of 525) of all samples for *XRCC1* and  
12  
13 for 90% (474 out of 525) of all samples for *OGGI*. Laboratory personnel were blinded to the  
14  
15 case-control status of the available samples.  
16  
17  
18  
19  
20  
21

### 22 ***PCR amplification and genetic polymorphisms detection***

23  
24 The real-time polymerase chain reactions with high resolution melting analysis (Real-time  
25  
26 PCR-HRM) technique of DNA amplification for the DNA base-excision repair genes (*XRCC1*  
27  
28 and *OGGI*) polymorphisms were performed in a 96-well plate in the LightCycler<sup>®</sup> 480 Real-  
29  
30 Time PCR System.  
31  
32

33  
34 The amplification of *XRCC1* G399A used two primers, [F]:5'-AGT GGG TGC TGG  
35  
36 ACT GTC-3' and [R]:5'-TTG CCC AGC ACA GGA TAA-3', and was performed in a  
37  
38 LightCycler<sup>®</sup> 480 Real-Time PCR System with a final volume of 20 µl containing 10 µl of  
39  
40 master mix, 4.4 µl of H<sub>2</sub>O, 3 mM of MgCl<sub>2</sub>, 0.3 µM of each primer and 200 ng of the DNA  
41  
42 template. The amplification of the *OGGI* C326G was performed in the same way, but the  
43  
44 primers were [F]:5'-CCT ACA GGT GCT GTT CAG T-3' and [R]:5'-CCT TTG GAA CCC TTT  
45  
46 CTG-3'.  
47  
48  
49

50  
51 HRM data were analyzed using the LightCycler 480<sup>®</sup> Gene Scanning Software version  
52  
53 1.5 (Roche). Normalized and temperature-shifted melting curves carrying a sequence variation  
54  
55 were evaluated and compared with the wild-type sample. Sequence variations were distinguished  
56  
57 by different shape of melting curves (Figure 1(A) for *XRCC1* G399A and (B) for *OGGI* C326G).  
58  
59  
60



1  
2  
3 Melting peaks of sequence variation were analyzed and compared with the wild-type sample.  
4  
5 Different plots were distinguished by different melting peaks for each genotype (Figure 1(C) for  
6  
7 *XRCCI* G399A and (D) for *OGGI* C326G). To improve the genotyping quality and validation,  
8  
9 genotyping of 10% of random samples was confirmed by the PCR with restriction fragment  
10  
11 length polymorphism techniques (PCR-RFLP).  
12  
13

### 14 15 16 17 **Statistical analysis**

18  
19 To assess the strength of the associations between polymorphisms in DNA base-excision repair  
20  
21 genes (*XRCCI* and *OGGI*) and the risk of CCA, odds ratio (ORs) with 95% confidence intervals  
22  
23 (CIs) were estimated using conditional logistic regression. A univariate analysis using  
24  
25 McNemar's chi-square test and conditional logistic regression was carried out to explore the  
26  
27 associations between DNA-repair genes polymorphisms, smoking and alcohol drinking, and the  
28  
29 risk of CCA. Factors found to have a strong association with CCA in the univariate analysis ( $p$   
30  
31  $<0.05$ ), and factors without association in the univariate analysis, but found to play important  
32  
33 roles as factors for CCA risk from literature reviews, were included in the multivariate analysis.  
34  
35 Possible modifications of the effects of smoking and alcohol drinking by polymorphisms in  
36  
37 *XRCCI* G399A and *OGGI* C326G were also analyzed. A  $P$ -value  $<0.05$  was considered  
38  
39 statistically significant. All statistical analyses were performed with a statistical package, STATA  
40  
41 version 10 (Stata, College Station, TX).  
42  
43  
44  
45  
46  
47  
48  
49

## 50 51 **RESULTS**

52  
53 There were 219 cohort members who had developed a primary CCA six or more months after  
54  
55 enrollment into the KKCS. They comprised 92 females and 127 males, with a median age of 57  
56  
57 years (minimum 31, maximum 69). There were two controls matched by age and sex for each  
58  
59  
60

1  
2  
3 case. Table 1 shows the distribution of *XRCC1* G399A and *OGGI* C326G polymorphisms in  
4 cases and controls, the joint distribution of those polymorphisms, and the associated odds ratios.  
5  
6 While there were no associations between any of these individual polymorphisms and the risk of  
7  
8 CCA, the combinations of *XRCC1* GA heterozygous and *OGGI* CC wild-type or CG  
9  
10 heterozygous, and of *XRCC1* GG wild-type and *OGGI* CG heterozygous, were significantly  
11  
12 related to a reduced risk of CCA ( $P$ -value  $<0.001$ ). Conversely, the combinations of the *OGGI*  
13  
14 GG mutant, homozygous with all three genotypes of *XRCC1* (wild-type, heterozygous and  
15  
16 mutant homozygous), were significantly associated with an increased risk of CCA ( $P$ -value =  
17  
18 0.01, 0.03 and 0.004, respectively), but there were no interactions between the polymorphisms of  
19  
20 *XRCC1* G399A and *OGGI* C326G on CCA risk.  
21  
22  
23  
24  
25

26  
27 In the univariate analysis (Table 2), there were significant associations between cigarette  
28  
29 smoking and alcohol consumption and the risk of CCA, and their joint effect appeared to be  
30  
31 multiplicative with no interactions between them. There was trend in risk with smoking  
32  
33 frequency or number of years of habitual smoking ( $P$ -value for trend = 0.002).  
34  
35

36  
37 In the multivariate analysis (Table 3), shows the adjusted ORs and 95% CIs from the  
38  
39 multivariate analysis. There was a clear association with alcohol drinking: compared with non-  
40  
41 drinkers, individuals who consumed  $<14$  units of alcohol per month had an increased risk of CCA  
42  
43 (OR=5.2, 95% CI 2.74 to 9.95), and the risk was higher still in those who consumed  $\geq 14$  units of  
44  
45 alcohol per month (OR=7.6, 95% CI 3.67 to 15.72).  
46  
47

48  
49 Table 4 shows the results of gene-environment interaction of the *XRCC1* and *OGGI*  
50  
51 polymorphisms along with smoking and alcohol drinking on the risk of CCA. When compared  
52  
53 with the reference subjects (nonsmokers with the *XRCC1* GG wild-type), smokers carrying the  
54  
55 *XRCC1* GG wild-type had an increased susceptibility to CCA (OR=2.8, 95% CI 1.30 to 5.91),  
56  
57  
58  
59  
60

1  
2  
3 and this was higher still in smokers with GA heterozygous (OR=3.4, 95% CI 1.60 to 7.28).  
4  
5 Moreover, smokers with the *OGGI* CC wild-type and CG heterozygous had an increased risk of  
6  
7 CCA compared with nonsmokers with the wild-type. With respect to alcohol consumption, some  
8  
9 combinations of alcohol drinking and mutant polymorphisms of both *XRCCI* and *OGGI* were  
10  
11 statistically significant. For example, compared with the reference group (nondrinkers with the  
12  
13 *XRCCI* GG wild-type), subjects with the *XRCCI* GA heterozygous who were nondrinkers or  
14  
15 drinkers (<14 units of alcohol per month) had an increased susceptibility to CCA (4.4-fold  
16  
17 increased to 8.8-fold). Similarly, subjects with the *XRCCI* AA variant genotype had an increased  
18  
19 risk of CCA (9.2-fold in nondrinkers increased to 10.3-fold in drinkers of <14 units of alcohol per  
20  
21 month). Again, there were no interactions between *XRCCI* or *OGGI* polymorphisms and  
22  
23 smoking or alcohol drinking.  
24  
25  
26  
27  
28  
29  
30

## 31 DISCUSSION

32  
33 This was a case-control study nested within the 23 584 Khon Kaen Cohort Study (KKCS).<sup>10, 11, 21</sup>  
34  
35 The design of this study minimises recall bias of cigarette smoking and alcohol drinking, as  
36  
37 subjects were interviewed at the time of recruitment, before case or control status was defined.  
38  
39 This design is very useful for examining the role of self-reported factors such as cigarette  
40  
41 smoking and alcohol consumption, which are modified when cancer is present.  
42  
43  
44

45  
46 Smoking was not associated with CCA development in this present study (after  
47  
48 adjustment for all other variables in the multivariate analysis) – polymorphisms in *XRCCI* and  
49  
50 *OGGI*, cigarette smoking and units of alcohol per month of all alcohol consumption.  
51  
52

53 Alcohol consumption was significantly associated with an increased risk of CCA in  
54  
55 previous studies in Thailand<sup>17, 18</sup> and elsewhere.<sup>20</sup> Alcohol may affect metabolic pathways of  
56  
57 endogenous and exogenous nitrosamines<sup>15, 18</sup> and it is associated with production of free radical  
58  
59  
60

1  
2  
3 intermediate, which can cause several kinds of DNA lesions.<sup>4, 14, 15</sup> Reduced repair of these DNA  
4  
5 lesions would therefore constitute a major risk factor for cancer development.<sup>14, 15</sup>  
6  
7

8 The genotype frequencies of *XRCC1* and *OGG1* polymorphisms found in the controls for  
9  
10 the present study were consistent with those found in other studies in Thailand: the prevalence of  
11  
12 the *XRCC1* codon 399 (A allele) was 56% in the present study compared with 42–59% in other  
13  
14 studies<sup>22-24</sup> and that of the *OGG1* codon 326 (G allele) was 71% compared with 75% and 80%.<sup>23,</sup>  
15  
16

17  
18  
19  
20  
21  
22  
23  
24  
25  
26  
27  
28  
29  
30  
31  
32  
33  
34  
35  
36  
37  
38  
39  
40  
41  
42  
43  
44  
45  
46  
47  
48  
49  
50  
51  
52  
53  
54  
55  
56  
57  
58  
59  
60

25  
*XRCC1* and *OGG1* are major DNA repair genes involved in BER. Mutations and  
polymorphisms in DNA repair genes, which affect the efficiency of DNA damage repair, may  
increase an individual's susceptibility to several cancers<sup>22-25</sup> including cancers of the  
hepatobiliary tract.<sup>5-7</sup> However, no studies on this topic have been conducted in relation to CCA  
susceptibility and especially not in Thailand where the incidence of CCA is highest in the  
world.<sup>16</sup> However, there are four studies in a Thai population, which investigated relationships  
between the BER gene polymorphisms and other common cancers. Whereas *XRCC1* G399A  
polymorphisms tend to be associated with a reduced risk of oral squamous cell carcinoma,<sup>22</sup> they  
are associated with increased risks of breast<sup>23</sup> and cervical cancers,<sup>24</sup> and *OGG1* C326G  
polymorphisms tend to be related to increased risks of breast<sup>23</sup> and lung cancers.<sup>25</sup>

Several studies have explored the associations between polymorphisms of the DNA repair  
genes involved in BER (*XRCC1* G399A and *OGG1* C326G) and the risk of various cancers, but  
they have shown inconsistent results. This may be the consequence of the different modifying  
effects, which these polymorphisms have on the balance during the DNA repair process.  
Imbalance in the tightly regulated process can be caused by SNPs and will result in deficient  
DNA repair and an increase in DNA breaks.<sup>26</sup> The *XRCC1* codon 399 A allele and the *OGG1* 326  
G allele have been associated with a reduced capacity of the DNA repair process as detected by

1  
2  
3 the persistence of DNA bulky adducts<sup>27-29</sup> and  $\gamma$ -irradiation induced oxidative DNA damage.<sup>30</sup> In  
4  
5 addition, the balance may be modified by smoking- and alcohol-induced oxidative DNA base  
6  
7 modifications interacting with the repair inefficiency of BER polymorphisms<sup>4</sup>; for example, the  
8  
9 *XRCCI* GA variant heterozygous carriers, who were nondrinkers or drinkers of <14 units of  
10  
11 alcohol per month, had an increased susceptibility to CCA (4.4-fold in nondrinkers increase to  
12  
13 8.8-fold in drinkers) when compared with nondrinkers carrying the *XRCCI* GG wild-type (Table  
14  
15 4).  
16  
17  
18  
19

20 In conclusion, this study is the first report of possible associations between the main  
21  
22 polymorphisms in BER genes (*XRCCI* G399A, *OGGI* C326G), the joint effects of both genes,  
23  
24 and their modification of the effects of cigarette smoking and alcohol drinking on CCA risk in a  
25  
26 Thai population. Our results suggest that polymorphisms in *XRCCI* and *OGGI* genes,  
27  
28 particularly in combination, were associated with increased susceptibility to CCA. CCA is a  
29  
30 multifaceted disease requiring a broad range of preventative actions. In the context of the present  
31  
32 study, there is a need for more effective programmes for smoking cessation and reducing alcohol  
33  
34 consumption, targeted especially at subgroups which are genetically at particular risk for CCA.  
35  
36 Such an approach could also help in the prevention of other forms of cancer.  
37  
38  
39  
40  
41  
42  
43  
44  
45  
46  
47  
48  
49  
50  
51  
52  
53  
54  
55  
56  
57  
58  
59  
60

**Table 1** Univariate analysis of *XRCC1* and *OGG1* polymorphisms with the risk of cholangiocarcinoma in Khon Kaen, Thailand

| Genetic polymorphisms                          | Cases |      | Controls |      | OR*  | 95% CI       | P-value       |        |
|------------------------------------------------|-------|------|----------|------|------|--------------|---------------|--------|
|                                                | n     | %    | n        | %    |      |              |               |        |
| <b><i>XRCC1</i> G399A<sup>†</sup></b>          |       |      |          |      |      |              |               |        |
| GG                                             | 62    | 38.8 | 149      | 44.0 | 1.0  |              |               |        |
| GA                                             | 94    | 58.8 | 169      | 49.9 | 1.3  | 0.89 to 1.97 | 0.17          |        |
| AA                                             | 4     | 2.5  | 21       | 6.2  | 0.5  | 0.16 to 1.42 | 0.18          |        |
| GA or AA (any A allele)                        | 98    | 61.3 | 190      | 56.1 | 1.2  | 0.82 to 1.78 | 0.33          |        |
| <b><i>OGG1</i> C326G<sup>‡</sup></b>           |       |      |          |      |      |              |               |        |
| CC                                             | 34    | 23.5 | 95       | 28.9 | 1.0  |              |               |        |
| CG                                             | 109   | 75.2 | 229      | 69.6 | 1.4  | 0.86 to 2.23 | 0.18          |        |
| GG                                             | 2     | 1.4  | 5        | 1.5  | 1.2  | 0.22 to 7.03 | 0.80          |        |
| CG or GG (any G allele)                        | 111   | 76.6 | 234      | 71.1 | 1.4  | 0.86 to 2.22 | 0.18          |        |
| <b><u>Joint effects</u></b>                    |       |      |          |      |      |              |               |        |
| <b><i>XRCC1</i> G399A    <i>OGG1</i> C326G</b> |       |      |          |      |      |              |               |        |
| GG                                             | CC    | 14   | 9.7      | 41   | 12.7 | 1.0          |               |        |
| GA                                             | CC    | 19   | 13.1     | 47   | 14.5 | 0.3          | 0.15 to 0.55  | <0.001 |
| AA                                             | CC    | 2    | 1.4      | 4    | 1.2  | 3.5          | 1.10 to 14.60 | 0.03   |
| GG                                             | CG    | 42   | 29.0     | 100  | 30.9 | 0.1          | 0.07 to 0.25  | <0.001 |
| GA                                             | CG    | 56   | 38.6     | 108  | 33.3 | 0.1          | 0.07 to 0.22  | <0.001 |
| AA                                             | CG    | 3    | 2.1      | 15   | 4.6  | 0.9          | 0.42 to 2.07  | 1.00   |
| GG                                             | GG    | 5    | 3.4      | 3    | 0.9  | 4.7          | 1.30 to 25.33 | 0.01   |
| GA                                             | GG    | 2    | 1.4      | 4    | 1.2  | 3.5          | 1.10 to 14.60 | 0.03   |
| AA                                             | GG    | 2    | 1.4      | 2    | 0.6  | 7.0          | 1.61 to 63.46 | 0.004  |
| <i>P-value for interaction = 0.21</i>          |       |      |          |      |      |              |               |        |

\*Crude odds ratio from matched case-control analysis.

<sup>†</sup>DNA samples for *XRCC1* genotyping were successfully carried out for 160 out of 175 cases, and 339 out of 350 controls.

<sup>‡</sup>DNA samples for *OGG1* genotyping were successfully carried out for 145 out of 175 cases, and 329 out of 350 controls.

**Table 2** Univariate analysis of cigarette smoking and alcohol drinking on the risk of cholangiocarcinoma in Khon Kaen, Thailand

| Variables                                                     | Cases |      | Controls |      | OR*  | 95% CI        | P-value |
|---------------------------------------------------------------|-------|------|----------|------|------|---------------|---------|
|                                                               | n     | %    | n        | %    |      |               |         |
| <b>Cigarette smoking</b>                                      |       |      |          |      |      |               |         |
| Non-smoker                                                    | 92    | 42.0 | 230      | 52.5 | 1.0  |               |         |
| Smoker                                                        | 127   | 58.0 | 208      | 47.5 | 2.7  | 1.57 to 4.50  | <0.001  |
| <b>Age at which smoking started of all cigarettes (years)</b> |       |      |          |      |      |               |         |
| Non-smoker                                                    | 92    | 42.0 | 230      | 52.5 | 1.0  |               |         |
| <17                                                           | 28    | 12.8 | 48       | 11.0 | 2.9  | 1.38 to 5.91  | 0.01    |
| 17–19                                                         | 35    | 16.0 | 44       | 10.1 | 3.6  | 1.85 to 7.17  | <0.001  |
| 20–21                                                         | 40    | 18.3 | 70       | 16.0 | 2.5  | 1.33 to 4.62  | 0.004   |
| 22+                                                           | 24    | 11.0 | 46       | 10.5 | 2.4  | 1.19 to 4.73  | 0.01    |
| <i>P-value for trend = 0.002</i>                              |       |      |          |      |      |               |         |
| <b>Alcohol consumption</b>                                    |       |      |          |      |      |               |         |
| No                                                            | 57    | 26.0 | 254      | 58.0 | 1.0  |               |         |
| Yes                                                           | 162   | 74.0 | 184      | 42.0 | 5.7  | 3.61 to 9.04  | <0.001  |
| <b>Units of alcohol per month of all alcohol consumption</b>  |       |      |          |      |      |               |         |
| Non-drinker                                                   | 57    | 26.0 | 254      | 58.0 | 1.0  |               |         |
| <14                                                           | 79    | 36.1 | 92       | 21.0 | 5.2  | 3.15 to 8.43  | <0.001  |
| ≥14                                                           | 83    | 37.9 | 92       | 21.0 | 6.7  | 3.90 to 11.38 | <0.001  |
| <b>Alcohol consumption and smoking</b>                        |       |      |          |      |      |               |         |
| No alcohol, non-smoker                                        | 42    | 19.2 | 178      | 40.6 | 1.0  |               |         |
| No alcohol, smoker                                            | 15    | 6.9  | 76       | 17.4 | 2.2  | 0.93 to 5.00  | 0.07    |
| Alcohol drinker, non-smoker                                   | 50    | 22.8 | 52       | 11.9 | 5.8  | 3.12 to 10.78 | <0.001  |
| Alcohol drinker, smoker                                       | 112   | 51.1 | 132      | 30.1 | 10.4 | 5.07 to 21.16 | <0.001  |
| <i>P-value for trend &lt;0.001</i>                            |       |      |          |      |      |               |         |
| <i>P-value for interaction = 0.68</i>                         |       |      |          |      |      |               |         |

\*Crude odds ratio from matched case-control analysis.

**Table 3** Cases and controls, and odds ratios for cholangiocarcinoma associated with smoking, alcohol drinking, and *XRCC1* and *OGG1* polymorphisms

| Variables                                                    | Cases |      | Controls |      | OR* | OR† | 95% CI‡       | P-value |
|--------------------------------------------------------------|-------|------|----------|------|-----|-----|---------------|---------|
|                                                              | n     | %    | n        | %    |     |     |               |         |
| <b><i>XRCC1</i> G399A polymorphisms§</b>                     |       |      |          |      |     |     |               |         |
| GG                                                           | 62    | 38.8 | 149      | 44.0 | 1.0 | 1.0 |               |         |
| GA                                                           | 94    | 58.8 | 169      | 49.9 | 1.3 | 1.2 | 0.76 to 1.94  | 0.43    |
| AA                                                           | 4     | 2.5  | 21       | 6.2  | 0.5 | 0.4 | 0.10 to 1.62  | 0.20    |
| <b><i>OGG1</i> C326G polymorphisms¶</b>                      |       |      |          |      |     |     |               |         |
| CC                                                           | 34    | 23.4 | 95       | 28.9 | 1.0 | 1.0 |               |         |
| CG                                                           | 109   | 75.2 | 229      | 69.6 | 1.4 | 1.2 | 0.70 to 2.07  | 0.49    |
| GG                                                           | 2     | 1.4  | 5        | 1.5  | 1.2 | 0.7 | 0.10 to 5.11  | 0.75    |
| <b>Cigarette smoking</b>                                     |       |      |          |      |     |     |               |         |
| Non-smoker                                                   | 92    | 42.0 | 230      | 52.5 | 1.0 | 1.0 |               |         |
| Smoker                                                       | 127   | 58.0 | 208      | 47.5 | 2.7 | 1.9 | 0.94 to 4.01  | 0.07    |
| <b>Units of alcohol per month of all alcohol consumption</b> |       |      |          |      |     |     |               |         |
| Non-drinker                                                  | 57    | 26.0 | 254      | 58.0 | 1.0 | 1.0 |               |         |
| <14                                                          | 79    | 36.1 | 92       | 21.0 | 5.2 | 5.2 | 2.74 to 9.95  | <0.001  |
| ≥14                                                          | 83    | 37.9 | 92       | 21.0 | 6.7 | 7.6 | 3.67 to 15.72 | <0.001  |

\*Crude odds ratio from matched case-control analysis.

†Adjusted odds ratio from matched case-control analysis (adjusted for all other variables in the table).

‡95% confidence interval for OR†.

§DNA samples for *XRCC1* genotyping were successfully carried out for 160 out of 175 cases, and 339 out of 350 controls.

¶DNA samples for *OGG1* genotyping were successfully carried out for 145 out of 175 cases, and 329 out of 350 controls.



**Table 4** Gene-environment interactions of *XRCC1* and *OGG1* polymorphisms together with smoking and alcohol drinking on cholangiocarcinoma risk in Khon Kaen, Thailand

| <i>XRCC1</i> | Smoking /<br>Use of alcohol                               | Cases | Controls | OR*  | 95% CI        | P-value       | <i>OGG1</i>  | Smoking /<br>Use of alcohol                               | Cases | Controls | OR*  | 95% CI        | P-value       |
|--------------|-----------------------------------------------------------|-------|----------|------|---------------|---------------|--------------|-----------------------------------------------------------|-------|----------|------|---------------|---------------|
|              |                                                           | n     | n        |      |               |               |              |                                                           | n     | n        |      |               |               |
| <b>G399A</b> | <b>All cigarettes smoking</b>                             |       |          |      |               | <i>0.87</i> † | <b>C326G</b> | <b>All cigarettes smoking</b>                             |       |          |      |               | <i>0.54</i> † |
| GG           | Non-smoker                                                | 22    | 71       | 1.0  |               |               | CC           | Non-smoker                                                | 14    | 55       | 1.0  |               |               |
| GA           | Non-smoker                                                | 48    | 99       | 1.5  | 0.82 to 2.79  | 0.18          | CG           | Non-smoker                                                | 49    | 122      | 1.5  | 0.77 to 2.99  | 0.22          |
| AA           | Non-smoker                                                | 2     | 11       | 0.6  | 0.11 to 2.74  | 0.47          | GG           | Non-smoker                                                | 1     | 1        | —    | —             | —             |
| GG           | Smoker                                                    | 40    | 78       | 2.8  | 1.30 to 5.91  | 0.01          | CC           | Smoker                                                    | 20    | 40       | 3.1  | 1.17 to 8.38  | 0.02          |
| GA           | Smoker                                                    | 46    | 70       | 3.4  | 1.60 to 7.28  | 0.001         | CG           | Smoker                                                    | 60    | 107      | 4.3  | 1.79 to 10.21 | 0.001         |
| AA           | Smoker                                                    | 2     | 10       | 1.2  | 0.21 to 6.29  | 0.86          | GG           | Smoker                                                    | 1     | 4        | 1.5  | 0.14 to 15.44 | 0.74          |
| <b>G399A</b> | <b>Units of alcohol per month of all alcohol drinking</b> |       |          |      |               | <i>0.80</i> † | <b>C326G</b> | <b>Units of alcohol per month of all alcohol drinking</b> |       |          |      |               | <i>0.74</i> † |
| GG           | Non-drinker                                               | 16    | 83       | 1.0  |               |               | CC           | Non-drinker                                               | 10    | 65       | 1.0  |               |               |
| GA           | Non-drinker                                               | 20    | 33       | 4.4  | 1.81 to 10.83 | 0.001         | CG           | Non-drinker                                               | 9     | 9        | 8.1  | 2.30 to 28.36 | 0.001         |
| AA           | Non-drinker                                               | 26    | 33       | 9.2  | 3.65 to 23.21 | <0.001        | GG           | Non-drinker                                               | 15    | 21       | 8.6  | 2.62 to 28.02 | <0.001        |
| GG           | <14                                                       | 22    | 102      | 1.1  | 0.49 to 2.28  | 0.89          | CC           | <14                                                       | 24    | 130      | 1.3  | 0.55 to 3.20  | 0.52          |
| GA           | <14                                                       | 39    | 35       | 8.8  | 3.76 to 20.71 | <0.001        | CG           | <14                                                       | 46    | 58       | 7.0  | 2.85 to 17.39 | <0.001        |
| AA           | <14                                                       | 33    | 32       | 10.3 | 4.14 to 25.80 | <0.001        | GG           | <14                                                       | 39    | 41       | 11.2 | 4.18 to 30.17 | <0.001        |
| GG           | ≥14                                                       | 1     | 12       | 0.4  | 0.05 to 3.71  | 0.44          | CC           | ≥14                                                       | 0     | 1        | —    | —             | —             |
| GA           | ≥14                                                       | 2     | 3        | 2.8  | 0.31 to 25.41 | 0.36          | CG           | ≥14                                                       | 1     | 1        | 7.7  | 0.29 to 26.73 | 0.22          |
| AA           | ≥14                                                       | 1     | 6        | 2.5  | 0.25 to 23.99 | 0.44          | GG           | ≥14                                                       | 1     | 3        | 6.4  | 0.48 to 86.72 | 0.16          |

\*Crude odds ratio from matched case-control analysis.

†P-value for interaction.

## Acknowledgements

This research was supported by the Thailand Research Fund (Research grant No. 540102) and the National Research University Project of Thailand, Office of the Higher Education Commission, through the Center of Excellence in Specific Health Problems in Greater Mekong Sub-region (SHeP-GMS), Khon Kaen University (Research grant No. NRU542005).

**Contributors:** All the authors involved in the conception and design, data collection, interpretation of data, revising the article critically for important intellectual content and final approval of the version to be published.

**Competing interests:** None.

**Data Sharing Statement:** No additional data are available.

## REFERENCES

1. Ferlay J, Shin HR, Bray F, *et al.* GLOBOCAN 2008 v2.0, Cancer Incidence and Mortality Worldwide: IARC CancerBase No.10 (Internet). Lyon, France: IARC; 2010.  
http://globocan.iarc.fr (accessed 27 Mar 2013).
2. Khuhaprema T, Attasara P, Sriplung H, *et al.* *Cancer in Thailand Volume VI, 2004-2006.* Bangkok: NCIB, 2012.
3. Parkin DM, Ohshima H, Srivatanakul P, *et al.* Cholangiocarcinoma: epidemiology, mechanisms of carcinogenesis and prevention. *Cancer Epidemiol Biomarkers Prev* 1993;2:537–44.
4. Stern MC, Conti DV, Siegmund KD, *et al.* DNA repair single-nucleotide polymorphisms in colorectal cancer and their role as modifiers of the effect of cigarette smoking and alcohol in the Singapore Chinese Health Study. *Cancer Epidemiol Biomarkers Prev* 2007;16:2363–72.
5. Huang WY, Gao YT, Rashid A, *et al.* Selected base excision repair gene polymorphisms and susceptibility to biliary tract cancer and biliary stones: a population-based case-control study in China. *Carcinogenesis* 2008;29:100–5.
6. Zhang M, Huang WY, Andreotti G, *et al.* Variants of DNA repair genes and the risk of biliary tract cancers and stones: a population-based study in China. *Cancer Epidemiol Biomarkers Prev* 2008;17:2123–7.
7. Srivastava A, Srivastava K, Pandey SN, *et al.* Single-nucleotide polymorphisms of DNA repair genes *OGGI* and *XRCCI*: association with gallbladder cancer in North Indian population. *Ann Surg Oncol* 2009;16:1695–703.
8. Thanan R, Murata M, Pinlaor S, *et al.* Urinary 8-oxo-7,8-dihydro-2'-deoxyguanosine in patients with parasite infection and effect of antiparasitic drug in relation to cholangiocarcinogenesis. *Cancer Epidemiol Biomarkers Prev* 2008;17:518–24.

- 1  
2  
3 9. Dechakhamphu S, Pinlaor S, Sitthithaworn P, *et al.* Lipid peroxidation and etheno DNA  
4 adducts in white blood cells of liver fluke-infected patients: protection by plasma alpha-  
5 tocopherol and praziquantel. *Cancer Epidemiol Biomarkers Prev* 2010;19:310–8.  
6  
7
- 8  
9  
10 10. Songserm N, Promthet S, Sithithaworn P, *et al.* *MTHFR* Polymorphisms and *Opisthorchis*  
11 *viverrini* Infection: a Relationship with Increased Susceptibility to Cholangiocarcinoma in  
12 Thailand. *Asian Pac J Cancer Prev* 2011;12:1341–5.  
13  
14
- 15 11. Songserm N, Promthet S, Sithithaworn P, *et al.* Risk factors for cholangiocarcinoma in high-  
16 risk area of Thailand: Role of lifestyle, diet and methylenetetrahydrofolate reductase  
17 polymorphisms. *Cancer Epidemiol* 2012;36:e89–94.  
18  
19
- 20 12. Kosti O, Byrne C, Meeker KL, *et al.* Mutagen sensitivity, tobacco smoking and breast cancer  
21 risk: a case-control study. *Carcinogenesis* 2010;31:654–9.  
22  
23
- 24 13. Rouissi K, Ouerhani S, Hamrita B, *et al.* Smoking and polymorphisms in xenobiotic  
25 metabolism and DNA repair genes are additive risk factors affecting bladder cancer in  
26 Northern Tunisia. *Pathol Oncol Res* 2011;17:879–86.  
27  
28
- 29 14. Mena S, Ortega A, Estrela JM. Oxidative stress in environmental-induced carcinogenesis.  
30 *Mutat Res* 2009;674:36–44.  
31  
32
- 33 15. Pelucchi C, Tramacere I, Boffetta P, *et al.* Alcohol consumption and cancer risk. *Nutr*  
34 *Cancer* 2011;63:983–90.  
35  
36
- 37 16. Parkin DM, Srivatanakul P, Khlat M, *et al.* Liver cancer in Thailand. I. A case-control study  
38 of cholangiocarcinoma. *Int J Cancer* 1991;48:323–8.  
39  
40
- 41 17. Chernrunroj G. Risk factors for cholangiocarcinoma: a case-control study (dissertation).  
42 Connecticut: Yale University, 2000.  
43  
44  
45  
46  
47  
48  
49  
50  
51  
52  
53  
54  
55  
56  
57  
58  
59  
60

- 1  
2  
3 18. Honjo S, Srivatanakul P, Sriplung H, *et al*. Genetic and environmental determinants of risk  
4 for cholangiocarcinoma via *Opisthorchis viverrini* in a densely infested area in Nakhon  
5  
6 Phanom, northeast Thailand. *Int J Cancer* 2005;117:854–60.  
7
- 8  
9  
10 19. Poomphakwaen K, Promthet S, Kamsa-Ard S, *et al*. Risk factors for cholangiocarcinoma in  
11  
12 Khon Kaen, Thailand: a nested case-control study. *Asian Pac J Cancer Prev* 2009;10:251–8.  
13
- 14  
15 20. Chalasani N, Baluyut A, Ismail A, *et al*. Cholangiocarcinoma in patients with primary  
16  
17 sclerosing cholangitis: a multicenter case-control study. *Hepatology* 2000;31:7–11.  
18
- 19  
20 21. Sriamporn S, Parkin DM, Pisani P, *et al*. A prospective study of diet, lifestyle, and genetic  
21  
22 factors and the risk of cancer in Khon Kaen Province, northeast Thailand: description of the  
23  
24 cohort. *Asian Pac J Cancer Prev* 2005;6:295–303.  
25
- 26  
27 22. Kietthubthew S, Sriplung H, Au WW, *et al*. Polymorphism in DNA repair genes and oral  
28  
29 squamous cell carcinoma in Thailand. *Int J Hyg Environ Health* 2006;209:21–9.  
30
- 31  
32 23. Sangrajrang S, Schmezer P, Burkholder I, *et al*. Polymorphisms in three base excision repair  
33  
34 genes and breast cancer risk in Thai women. *Breast Cancer Res Treat* 2008;111:279–88.  
35
- 36  
37 24. Settheetham-Ishida W, Yuenyao P, Natphopsuk S, *et al*. Genetic Risk of DNA Repair Gene  
38  
39 Polymorphisms (*XRCC1* and *XRCC3*) for High Risk Human Papillomavirus Negative  
40  
41 Cervical Cancer in Northeast Thailand. *Asian Pac J Cancer Prev* 2011;12:963–6.  
42
- 43  
44 25. Klinchid J, Chewaskulyoung B, Saeteng S, *et al*. Effect of combined genetic polymorphisms  
45  
46 on lung cancer risk in northern Thai women. *Cancer Genet Cytogenet* 2009;195:143–9.  
47
- 48  
49 26. Mohrenweiser HW, Wilson DM 3rd, Jones IM. Challenges and complexities in estimating  
50  
51 both the functional impact and the disease risk associated with the extensive genetic variation  
52  
53 in human DNA repair genes. *Mutat Res* 2003;526:93–125.  
54
- 55  
56 27. Lunn RM, Langlois RG, Hsieh LL, *et al*. *XRCC1* polymorphisms: effects on aflatoxin B1-  
57  
58 DNA adducts and glycoporphin A variant frequency. *Cancer Res* 1999;59:2557–61.  
59  
60

- 1  
2  
3 28. Duell EJ, Millikan RC, Pittman GS, *et al.* Polymorphisms in the DNA repair gene *XRCC1*  
4 and breast cancer. *Cancer Epidemiol Biomarkers Prev* 2001;10:217–22.  
5  
6  
7  
8 29. Matullo G, Guarrera S, Carturan S, *et al.* DNA repair gene polymorphisms, bulky DNA  
9 adducts in white blood cells and bladder cancer in a case-control study. *Int J Cancer*  
10 2001;92:562–7.  
11  
12  
13  
14 30. Vodicka P, Stetina R, Polakova V, *et al.* Association of DNA repair polymorphisms with  
15 DNA repair functional outcomes in healthy human subjects. *Carcinogenesis* 2007;28:657–  
16 64.  
17  
18  
19  
20  
21  
22  
23  
24  
25  
26  
27  
28  
29  
30  
31  
32  
33  
34  
35  
36  
37  
38  
39  
40  
41  
42  
43  
44  
45  
46  
47  
48  
49  
50  
51  
52  
53  
54  
55  
56  
57  
58  
59  
60

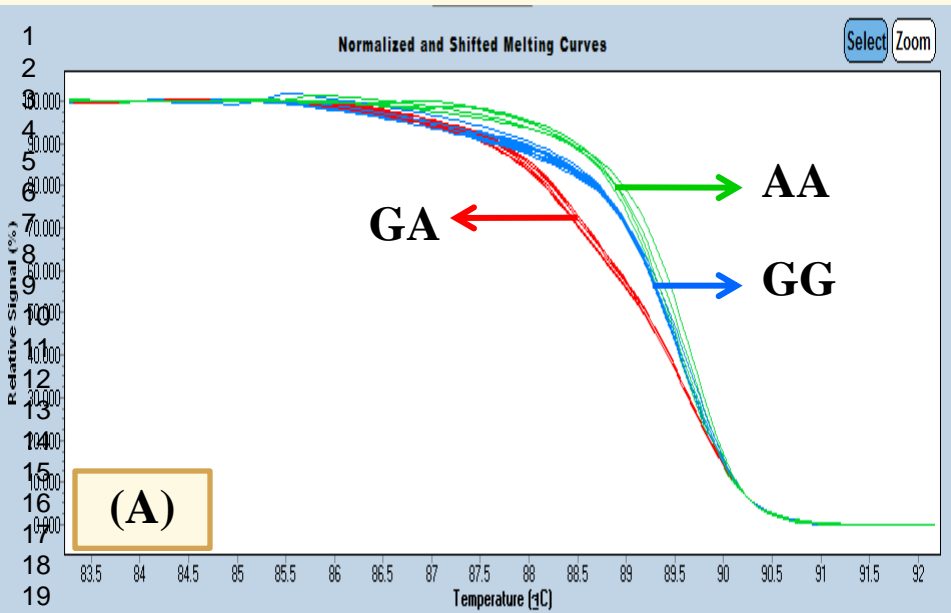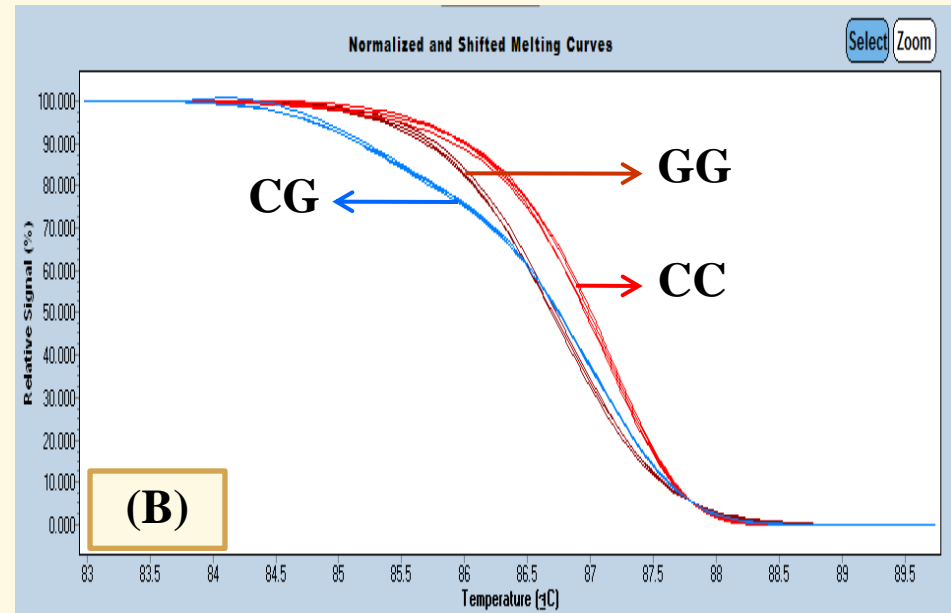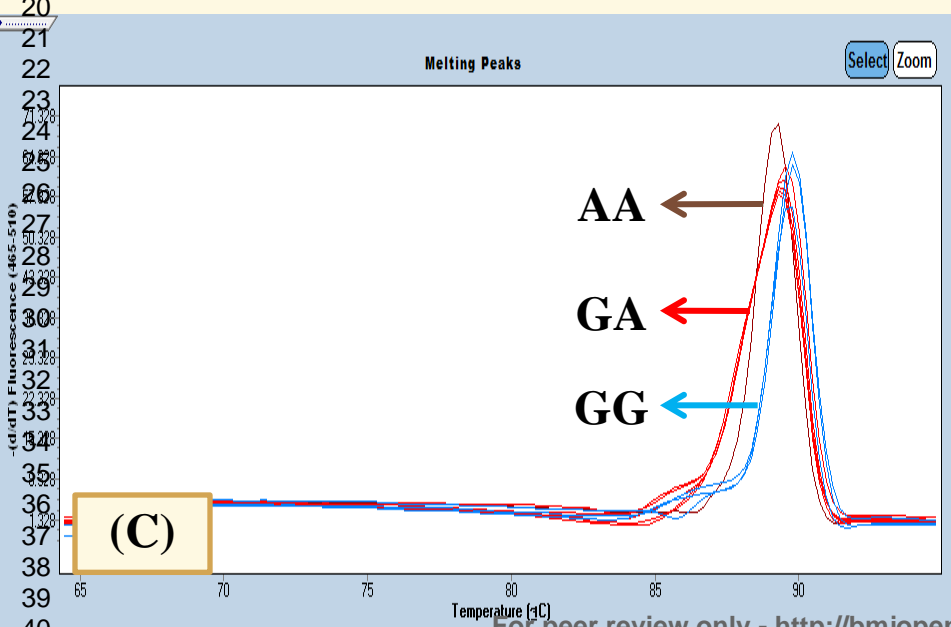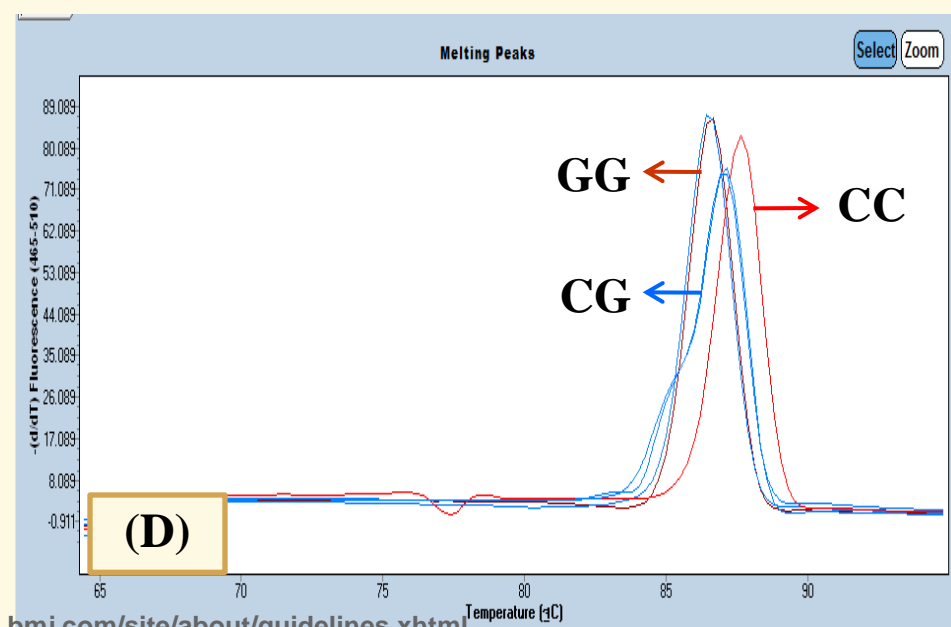

Figure 1 Polymorphisms in *XRCC1* G399A and *OGG1* C326G were analyzed using PCR with high resolution melting analysis.

# BMJ Open

## Gene-environment interaction involved in cholangiocarcinoma in Thai population: polymorphisms of DNA repair genes, smoking and use of alcohol

|                                 |                                                                                                                                                                                                                                                                                                                                                                                                                                                                                                                                                                                                           |
|---------------------------------|-----------------------------------------------------------------------------------------------------------------------------------------------------------------------------------------------------------------------------------------------------------------------------------------------------------------------------------------------------------------------------------------------------------------------------------------------------------------------------------------------------------------------------------------------------------------------------------------------------------|
| Journal:                        | <i>BMJ Open</i>                                                                                                                                                                                                                                                                                                                                                                                                                                                                                                                                                                                           |
| Manuscript ID:                  | bmjopen-2014-005447.R1                                                                                                                                                                                                                                                                                                                                                                                                                                                                                                                                                                                    |
| Article Type:                   | Research                                                                                                                                                                                                                                                                                                                                                                                                                                                                                                                                                                                                  |
| Date Submitted by the Author:   | 11-Sep-2014                                                                                                                                                                                                                                                                                                                                                                                                                                                                                                                                                                                               |
| Complete List of Authors:       | Songserm, Nopparat; Ubon Ratchathani Rajabhat University, Department of Community Health, Faculty of Public Health<br>Promthet, Supanee; Khon Kaen University, Department of Epidemiology, Faculty of Public Health<br>Pientong, Chamsai; Khon Kaen University, Department of Microbiology, Faculty of Medicine<br>Ekalaksananan, Tipaya; Khon Kaen University, Department of Microbiology, Faculty of Medicine<br>Chopjitt, Peechanika; Khon Kaen University, Department of Microbiology, Faculty of Medicine<br>Wiangnon, Surapon; Khon Kaen University, Department of Paediatrics, Faculty of Medicine |
| <b>Primary Subject Heading</b>: | Epidemiology                                                                                                                                                                                                                                                                                                                                                                                                                                                                                                                                                                                              |
| Secondary Subject Heading:      | Epidemiology, Public health                                                                                                                                                                                                                                                                                                                                                                                                                                                                                                                                                                               |
| Keywords:                       | EPIDEMIOLOGY, Epidemiology < ONCOLOGY, PUBLIC HEALTH                                                                                                                                                                                                                                                                                                                                                                                                                                                                                                                                                      |
|                                 |                                                                                                                                                                                                                                                                                                                                                                                                                                                                                                                                                                                                           |

SCHOLARONE™  
Manuscripts



1  
2  
3 **Gene-environment interaction involved in cholangiocarcinoma in Thai population:**  
4  
5 **polymorphisms of DNA repair genes, smoking and use of alcohol**  
6  
7  
8  
9

10 **Corresponding author**

11  
12 Professor Supanee Promthet, Department of Epidemiology, Faculty of Public Health, Khon  
13  
14 Kaen University, Khon Kaen, 40002, Thailand

15  
16 Phone: +66(0) 43-347057; Fax +66(0) 43-347058; E-mail: supanee@kku.ac.th  
17  
18  
19  
20  
21  
22

23 **Author names**

24  
25 Nopparat Songserm,<sup>1</sup> Supanee Promthet,<sup>2</sup> Chamsai Pientong,<sup>3</sup> Tipaya Ekalaksananan,<sup>3</sup>  
26  
27 Peechanika Chopjitt,<sup>3</sup> Surapon Wiangnon,<sup>4,5</sup>  
28  
29  
30  
31  
32

33 **Author affiliations**

34  
35 <sup>1</sup>Department of Community Health, Faculty of Public Health, Ubon Ratchathani Rajabhat  
36  
37 University, Thailand

38  
39 <sup>2</sup>Department of Epidemiology, Faculty of Public Health, Khon Kaen University, Thailand  
40  
41

42 <sup>3</sup>Department of Microbiology, Faculty of Medicine, Khon Kaen University, Thailand  
43  
44

45 <sup>4</sup>Department of Paediatrics, Faculty of Medicine, Khon Kaen University, Thailand  
46  
47

48 <sup>5</sup>Cancer Unit, Faculty of Medicine, Khon Kaen University, Thailand  
49  
50  
51

52 **Keywords:** Cholangiocarcinoma, Polymorphisms, DNA repair genes, Smoking, Alcohol  
53  
54 drinking  
55

56 **Word count:** 2759 words  
57  
58  
59  
60

## ABSTRACT

**Objective:** Cholangiocarcinoma (CCA) is the most common malignancy in a Northeast Thai population. Smoking and alcohol drinking are associated with production of free radical intermediates, which can cause several types of DNA lesions. Reduced repair of these DNA lesions would constitute an important risk factor for cancer development. We therefore examined that whether polymorphisms in DNA base-excision repair (BER) genes, *XRCC1* G399A and *OGG1* C326G, were associated with CCA risk and whether they modified the effect of smoking and alcohol drinking in Thai population.

**Design:** A nested case-control study within cohort study was conducted: 219 subjects with primary CCA were each matched with two non-cancer controls from the same cohort on sex, age at recruitment and presence/absence of *Opisthorchis viverrini* eggs in stools. Smoking and alcohol consumption were assessed on recruitment. Polymorphisms in BER genes were analyzed using a polymerase chain reaction with high resolution melting analysis. The associations were assessed using conditional logistic regression.

**Results:** Our results suggest that in Thai population polymorphisms in *XRCC1* and *OGG1* genes, particularly in combination, are associated with increased susceptibility to CCA, and that their role as modifiers of the effect of smoking and alcohol consumption influences the risk of CCA.

**Conclusions:** Better ways of reducing habitual smoking and alcohol consumption, targeted toward subgroups which are genetically susceptible, are recommended. CCA is multi-factorial disease, and a comprehensive approach is needed for its effective prevention. This approach would also have the additional advantage of reducing the onset of other cancers.

### Strengths and limitations of this study

- This was a nested case-control study within the cohort study. This design has the advantage of minimising a systematic recall bias which can occur when the receipt of diagnosis of cancer leads to subjects modifying their self-reported personal histories, in this case, their recall of cigarette smoking and alcohol consumption. This was prevented in the present study because subjects were interviewed at the time of recruitment, before case or control status was defined.
- The diagnosis of cholangiocarcinoma was not histologically confirmed in all the cases.
- This study did not include the population aged 70 years and above.
- In future research, larger samples are needed to increase the power of the studies.

## INTRODUCTION

The data from GLOBOCAN 2008 shows that liver cancer is the fourth most common cause of death from cancer worldwide.<sup>1</sup> It is the most common cancer in Northeast Thailand, where the great majority of cases are cholangiocarcinomas (CCA).<sup>2</sup> Data from the Khon Kaen Cancer Registry (KKCR) have shown that the estimated age-standardised incidence rates for men and women are 84.6 and 36.8 per 100 000, respectively.<sup>3</sup>

Among several types of DNA damage induced by carcinogens from tobacco and alcohol are oxidative base damage and single-strand breaks, which are repaired by the base-excision repair pathway (BER).<sup>4</sup> Genetic variants and polymorphisms in DNA repair pathways have been reported to affect the levels of DNA lesions, which accumulate in the epithelial tissue of the hepatobiliary tract system, thus influencing the susceptibility to biliary tract cancers and stones in a Chinese population<sup>5, 6</sup> and gallbladder cancer in an Indian population.<sup>7</sup> There were very few studies on this topic in relation to CCA in Thai population, but there have been studies, which clarify the role of the accumulation of levels of oxidative DNA lesions in liver fluke-infected- and CCA patients<sup>8-10</sup>; these studies concluded that some biomarkers from oxidative DNA lesions induced by liver fluke infection – a major risk factor – may play an important role in CCA development. However, the results from our previous study showed that not only liver fluke infection but also certain lifestyle and dietary co-factors were associated with increased risk of CCA.<sup>11, 12</sup> Long-term smoking<sup>13, 14</sup> and alcohol drinking<sup>4, 15, 16</sup> are associated with production of free radical intermediates, which can cause several kinds of DNA lesions. Reduced repair of these DNA lesions would constitute an important risk factor for cancer development. With respect to genetic factors, a number of polymorphisms in various DNA repair genes have been discovered, and it is possible that these polymorphisms may affect DNA repair capacity and thus modulate susceptibility to cancer. Investigations are therefore needed into the different patterns of

1  
2  
3 smoking and alcohol drinking in relation to susceptibility to CCA, along with DNA repair  
4  
5 capacity induced by genetic variations or polymorphisms.  
6  
7

8 Although cigarette smoking was not associated with CCA development in the previous  
9  
10 studies conducted in Thailand<sup>12, 17-20</sup> and elsewhere,<sup>21</sup> a modifying effect by DNA repair genes  
11  
12 remains a possibility. With respect to the use of alcohol, this was related to a substantially  
13  
14 increased risk of CCA in our previous study.<sup>12</sup> At the molecular level, it is known that single-  
15  
16 nucleotide polymorphisms (SNPs) in genes participate biochemically in the base-excision repair  
17  
18 pathway (X-ray repair cross-complementing group 1: *XRCC1* and 8-oxoguanine DNA  
19  
20 glycosylase 1: *OGG1*), which repairs smoking- and alcohol-induced oxidative DNA base  
21  
22 modifications.<sup>4</sup>  
23  
24  
25  
26

27 In this present study, we therefore investigated whether polymorphisms in DNA base-  
28  
29 excision repair genes (*XRCC1* G399A and *OGG1* C326G) are associated with CCA risk and  
30  
31 whether their effects are modified by cigarette smoking and alcohol drinking in a Northeastern  
32  
33 Thai population residing in a high-incidence area of opisthorchiasis-related CCA. The selection  
34  
35 of these SNPs in DNA base-excision repair genes was based on their putative effect on protein  
36  
37 function and/or previous evidence of associations with the risk of hepatobiliary tract cancers in  
38  
39 Asian, Chinese and Indian populations<sup>5-7</sup> and the combined effects of a DNA-repair gene and  
40  
41 metabolic gene polymorphisms on CCA risk in Thailand.<sup>10</sup> However, these studies involved only  
42  
43 gene-gene interactions. There is need for studies of gene-environment interactions, especially  
44  
45 between DNA-repair genes and exposure to the carcinogenic effects of tobacco/alcohol  
46  
47 carcinogens in relation to CCA risk.  
48  
49  
50  
51  
52  
53  
54  
55  
56  
57  
58  
59  
60

## MATERIALS AND METHODS

### Study subjects

This was a case-control study nested within the 23 584 Khon Kaen Cohort Study (KKCS). Details of the KKCS and the selection of CCA cases and controls used in the present study have been previously reported.<sup>11, 12, 22</sup> Briefly, 219 cohort members who had developed a primary CCA, diagnosis at least by ultrasound, with or without contrast radiology, tumour markers (such as CA19-9) or histopathology, six or more months after enrollment were identified. The vital status and date of death of potential cases were ascertained by linkage to the files of deaths in Thailand, which are held in the database of the National Health Security Office and the demographic database of Ministry of Interior. All cases had died within two years of diagnosis. Two non-cancer controls from the same cohort population were randomly selected for matching with each case on sex, age at recruitment ( $\pm 3$  years) and presence/absence of liver fluke eggs in the faeces at recruitment (detected by the formalin ethyl acetate concentration technique). This research was approved by the Khon Kaen University Ethics Committee for Human Research (Reference No. HE512053).

### Assessment of cigarette smoking and alcohol drinking

Definitions of alcohol use, cigarette smoking and levels of consumption of alcohol were the same as those previously described.<sup>12</sup> A smoker was defined as someone who had ever smoked any type of cigarette on a daily basis. However, in the present study smokers were categorized into four groups according to age when they began smoking. The 1<sup>st</sup>, 2<sup>nd</sup> and 3<sup>rd</sup> quartiles obtained from the control group frequency distribution for age of starting to smoke were used as the cut-offs for the four groups.

1  
2  
3 Ever drinkers were defined as those who consumed at least one type of alcoholic beverage  
4 (beer, *Sato*, white whisky, red whisky and other whiskies) at least once a month; those drinking  
5 less than this were defined as non-drinkers. The consumption of each subject was calculated in  
6 terms of units of alcohol, where a unit corresponds to 10 ml (approximately 8 gm) of ethanol.  
7  
8 The number of units of alcohol in a drink was determined by multiplying volume of the drink (in  
9 milliliters) by its alcohol percentage (beer 5.0%, *Sato* 7.0%, white whisky 40%, red whisky 35%)  
10 and dividing by 1000. Drinkers were dichotomized according to units of alcohol consumed per  
11 month on the basis of the median monthly consumption for the controls.  
12  
13  
14  
15  
16  
17  
18  
19  
20  
21  
22  
23

## 24 **Laboratory methods**

### 25 *Specimen collection and DNA extraction*

26  
27 Blood samples (buffy coat) were available for 175 (80%) of the 219 eligible CCA cases;  
28 specimens were retrieved from the KKCS bio-bank for these cases and for the 350 matched  
29 controls. Genomic DNA was extracted from buffy coat fractions using the standard protocols of  
30 Genomic DNA Mini Kit with Proteinase K (Geneaid Biotech). Of those with DNA samples,  
31 genotyping was successfully carried out for 95% (499 out of 525) of all samples for *XRCC1* and  
32 for 90% (474 out of 525) of all samples for *OGGI*. Laboratory personnel were blinded to the  
33 case-control status of the available samples.  
34  
35  
36  
37  
38  
39  
40  
41  
42  
43  
44  
45  
46  
47

### 48 *PCR amplification and genetic polymorphisms detection*

49  
50 The real-time polymerase chain reactions with high resolution melting analysis (Real-time  
51 PCR-HRM) technique of DNA amplification for the DNA base-excision repair genes (*XRCC1*  
52 and *OGGI*) polymorphisms were performed in a 96-well plate in the LightCycler<sup>®</sup> 480 Real-  
53 Time PCR System.  
54  
55  
56  
57  
58  
59  
60

1  
2  
3 The amplification of *XRCC1* G399A used two primers, [F]:5'-AGT GGG TGC TGG  
4 ACT GTC-3' and [R]:5'-TTG CCC AGC ACA GGA TAA-3', and was performed in a  
5 LightCycler<sup>®</sup> 480 Real-Time PCR System with a final volume of 20 µl containing 10 µl of  
6 master mix, 4.4 µl of H<sub>2</sub>O, 3 mM of MgCl<sub>2</sub>, 0.3 µM of each primer and 200 ng of the DNA  
7 template. The amplification of the *OGGI* C326G was performed in the same way, but the  
8 primers were [F]:5'-CCT ACA GGT GCT GTT CAG T-3' and [R]:5'-CCT TTG GAA CCC TTT  
9 CTG-3'.  
10  
11  
12  
13  
14  
15  
16  
17  
18  
19

20 HRM data were analyzed using the LightCycler 480<sup>®</sup> Gene Scanning Software version  
21 1.5 (Roche). Normalized and temperature-shifted melting curves carrying a sequence variation  
22 were evaluated and compared with the wild-type sample. Sequence variations were distinguished  
23 by different shape of melting curves (Figure 1(A) for *XRCC1* G399A and (B) for *OGGI* C326G).  
24 Melting peaks of sequence variation were analyzed and compared with the wild-type sample.  
25 Different plots were distinguished by different melting peaks for each genotype (Figure 1(C) for  
26 *XRCC1* G399A and (D) for *OGGI* C326G). To improve the genotyping quality and validation,  
27 genotyping of 10% of random samples was confirmed by the PCR with restriction fragment  
28 length polymorphism techniques (PCR-RFLP).  
29  
30  
31  
32  
33  
34  
35  
36  
37  
38  
39  
40  
41  
42  
43

#### 44 **Statistical analysis**

45 To assess the strength of the associations between polymorphisms in DNA base-excision repair  
46 genes (*XRCC1* and *OGGI*) and the risk of CCA, odds ratio (ORs) with 95% confidence intervals  
47 (CIs) were estimated using conditional logistic regression. A univariate analysis using  
48 McNemar's chi-square test and conditional logistic regression was carried out to explore the  
49 associations between DNA-repair genes polymorphisms, smoking and alcohol drinking, and the  
50 risk of CCA. Factors found to have a strong association with CCA in the univariate analysis (p  
51  
52  
53  
54  
55  
56  
57  
58  
59  
60



1  
2  
3 <0.05), and factors without association in the univariate analysis, but found to play important  
4 roles as factors for CCA risk from literature reviews, were included in the multivariate analysis.  
5  
6 Possible modifications of the effects of smoking and alcohol drinking by polymorphisms in  
7  
8 *XRCCI* G399A and *OGGI* C326G were also analyzed. A *P*-value <0.05 was considered  
9  
10 statistically significant. All statistical analyses were performed with a statistical package, STATA  
11  
12 version 10 (Stata, College Station, TX).  
13  
14  
15  
16  
17  
18  
19

## 20 RESULTS

21  
22 There were 219 cohort members who had developed a primary CCA six or more months after  
23 enrollment into the KKCS. They comprised 92 females and 127 males, with a median age of 57  
24 years (minimum 31, maximum 69). There were two controls matched by age and sex for each  
25 case. Table 1 shows the distribution of *XRCCI* G399A and *OGGI* C326G polymorphisms in  
26 cases and controls, the joint distribution of those polymorphisms, and the associated odds ratios.  
27  
28 While there were no associations between any of these individual polymorphisms and the risk of  
29 CCA, the combinations of *XRCCI* GA heterozygous and *OGGI* CC wild-type or CG  
30 heterozygous, and of *XRCCI* GG wild-type and *OGGI* CG heterozygous, were significantly  
31 related to a reduced risk of CCA (*P*-value <0.001). Conversely, the combinations of the *OGGI*  
32 GG mutant, homozygous with all three genotypes of *XRCCI* (wild-type, heterozygous and  
33 mutant homozygous), were significantly associated with an increased risk of CCA (*P*-value =  
34 0.01, 0.03 and 0.004, respectively), but there were no interactions between the polymorphisms of  
35  
36  
37  
38  
39  
40  
41  
42  
43  
44  
45  
46  
47  
48  
49  
50  
51  
52  
53  
54  
55  
56  
57  
58  
59  
60

In the univariate analysis (Table 2), there were significant associations between cigarette smoking and alcohol consumption and the risk of CCA, and their joint effect appeared to be

1  
2  
3 multiplicative with no interactions between them. There was trend in risk with smoking  
4  
5 frequency or number of years of habitual smoking ( $P$ -value for trend = 0.002).  
6  
7

8 In the multivariate analysis (Table 3), shows the adjusted ORs and 95% CIs from the  
9  
10 multivariate analysis. There was a clear association with alcohol drinking: compared with non-  
11  
12 drinkers, individuals who consumed <14 units of alcohol per month had an increased risk of CCA  
13  
14 (OR=5.2, 95% CI 2.74 to 9.95), and the risk was higher still in those who consumed  $\geq$ 14 units of  
15  
16 alcohol per month (OR=7.6, 95% CI 3.67 to 15.72).  
17  
18  
19

20 Table 4 shows the results of gene-environment interaction of the *XRCC1* and *OGGI*  
21  
22 polymorphisms along with smoking and alcohol drinking on the risk of CCA. When compared  
23  
24 with the reference subjects (nonsmokers with the *XRCC1* GG wild-type), smokers carrying the  
25  
26 *XRCC1* GG wild-type had an increased susceptibility to CCA (OR=2.8, 95% CI 1.30 to 5.91),  
27  
28 and this was higher still in smokers with GA heterozygous (OR=3.4, 95% CI 1.60 to 7.28).  
29  
30 Moreover, smokers with the *OGGI* CC wild-type and CG heterozygous had an increased risk of  
31  
32 CCA compared with nonsmokers with the wild-type. With respect to alcohol consumption, some  
33  
34 combinations of alcohol drinking and mutant polymorphisms of both *XRCC1* and *OGGI* were  
35  
36 statistically significant. For example, compared with the reference group (nondrinkers with the  
37  
38 *XRCC1* GG wild-type), subjects with the *XRCC1* GA heterozygous who were nondrinkers or  
39  
40 drinkers (<14 units of alcohol per month) had an increased susceptibility to CCA (4.4-fold  
41  
42 increased to 8.8-fold). Similarly, subjects with the *XRCC1* AA variant genotype had an increased  
43  
44 risk of CCA (9.2-fold in nondrinkers increased to 10.3-fold in drinkers of <14 units of alcohol per  
45  
46 month). Again, there were no interactions between *XRCC1* or *OGGI* polymorphisms and  
47  
48 smoking or alcohol drinking.  
49  
50  
51  
52  
53  
54  
55  
56  
57  
58  
59  
60

## DISCUSSION

This was a case-control study nested within the 23 584 Khon Kaen Cohort Study (KKCS).<sup>11, 12, 22</sup>

The design of this study minimises recall bias of cigarette smoking and alcohol drinking, as subjects were interviewed at the time of recruitment, before case or control status was defined.

This design is very useful for examining the role of self-reported factors such as cigarette smoking and alcohol consumption, which are modified when cancer is present.

Smoking was not associated with CCA development in this present study (after adjustment for all other variables in the multivariate analysis) – polymorphisms in *XRCC1* and *OGG1*, cigarette smoking and units of alcohol per month of all alcohol consumption.

Alcohol consumption was significantly associated with an increased risk of CCA in previous studies in Thailand<sup>18, 19</sup> and elsewhere.<sup>21</sup> Alcohol may affect metabolic pathways of endogenous and exogenous nitrosamines<sup>16, 19</sup> and it is associated with production of free radical intermediate, which can cause several kinds of DNA lesions.<sup>4, 15, 16</sup> Reduced repair of these DNA lesions would therefore constitute a major risk factor for cancer development.<sup>15, 16</sup>

The genotype frequencies of *XRCC1* and *OGG1* polymorphisms found in the controls for the present study were consistent with those found in other studies in Thailand: the prevalence of G allele of *XRCC1* codon 399 was 68.88% in the present study compared with 36.59%–73.20% in other studies<sup>10, 23-25</sup> and A allele of *XRCC1* codon 399 was 31.12% in controls (prevalence of A allele was 26.80%–52.56%). In our analysis of the *OGG1* codon 326, the genotype distribution in the controls deviated from the Hardy–Weinberg equilibrium. Genotype frequency of *OGG1* C326G in controls was slightly higher than rates noted in reports from other studies in Thailand.<sup>10, 24, 26</sup> The C allele of *OGG1* codon 326 was 63.68% in controls (C allele prevalence was between 50.12%–55.00%) and G allele of *OGG1* codon 326 was 36.32% in controls (prevalence of G allele in *OGG1* codon 326 was between 45.00%–49.88%).

1  
2  
3  
4  
5  
6  
7  
8  
9  
10  
11  
12  
13  
14  
15  
16  
17  
18  
19  
20  
21  
22  
23  
24  
25  
26  
27  
28  
29  
30  
31  
32  
33  
34  
35  
36  
37  
38  
39  
40  
41  
42  
43  
44  
45  
46  
47  
48  
49  
50  
51  
52  
53  
54  
55  
56  
57  
58  
59  
60

*XRCCI* and *OGGI* are major DNA repair genes involved in BER. Mutations and polymorphisms in DNA repair genes, which affect the efficiency of DNA damage repair, may increase an individual's susceptibility to several cancers<sup>23-26</sup> including cancers of the hepatobiliary tract.<sup>5-7</sup> However, no studies on this topic have been conducted in relation to CCA susceptibility and especially not in Thailand where the incidence of CCA is highest in the world.<sup>17</sup> However, there are four studies in a Thai population, which investigated relationships between the BER gene polymorphisms and other common cancers. Whereas *XRCCI* G399A polymorphisms tend to be associated with a reduced risk of oral squamous cell carcinoma,<sup>23</sup> they are associated with increased risks of breast<sup>24</sup> and cervical cancers,<sup>25</sup> and *OGGI* C326G polymorphisms tend to be related to increased risks of breast<sup>24</sup> and lung cancers.<sup>26</sup>

Several studies have explored the associations between polymorphisms of the DNA repair genes involved in BER (*XRCCI* G399A and *OGGI* C326G) and the risk of various cancers, but they have shown inconsistent results. This may be the consequence of the different modifying effects, which these polymorphisms have on the balance during the DNA repair process. Imbalance in the tightly regulated process can be caused by SNPs and will result in deficient DNA repair and an increase in DNA breaks.<sup>27</sup> The *XRCCI* codon 399 A allele and the *OGGI* 326 G allele have been associated with a reduced capacity of the DNA repair process as detected by the persistence of DNA bulky adducts<sup>28-30</sup> and  $\gamma$ -irradiation induced oxidative DNA damage.<sup>31</sup> In addition, the balance may be modified by smoking- and alcohol-induced oxidative DNA base modifications interacting with the repair inefficiency of BER polymorphisms<sup>4</sup>; for example, the *XRCCI* GA variant heterozygous carriers, who were nondrinkers or drinkers of <14 units of alcohol per month, had an increased susceptibility to CCA (4.4-fold in nondrinkers increase to

1  
2  
3 8.8-fold in drinkers) when compared with nondrinkers carrying the *XRCC1* GG wild-type (Table  
4  
5  
6 4).

7  
8 In conclusion, this study is the first report of possible associations between the main  
9  
10 polymorphisms in BER genes (*XRCC1* G399A, *OGGI* C326G), the joint effects of both genes,  
11  
12 and their modification of the effects of cigarette smoking and alcohol drinking on CCA risk in a  
13  
14 Thai population. Our results suggest that polymorphisms in *XRCC1* and *OGGI* genes,  
15  
16 particularly in combination, were associated with increased susceptibility to CCA. CCA is a  
17  
18 multifaceted disease requiring a broad range of preventative actions. In the context of the present  
19  
20 study, there is a need for more effective programmes for smoking cessation and reducing alcohol  
21  
22 consumption, targeted especially at subgroups which are genetically at particular risk for CCA.  
23  
24  
25  
26  
27 Such an approach could also help in the prevention of other forms of cancer.  
28  
29  
30  
31  
32  
33  
34  
35  
36  
37  
38  
39  
40  
41  
42  
43  
44  
45  
46  
47  
48  
49  
50  
51  
52  
53  
54  
55  
56  
57  
58  
59  
60

**Table 1** Univariate analysis of *XRCC1* and *OGG1* polymorphisms with the risk of cholangiocarcinoma in Khon Kaen, Thailand

| Genetic polymorphisms                          | Cases |      | Controls |      | OR*  | 95% CI       | P-value       |        |
|------------------------------------------------|-------|------|----------|------|------|--------------|---------------|--------|
|                                                | n     | %    | n        | %    |      |              |               |        |
| <b><i>XRCC1</i> G399A<sup>†</sup></b>          |       |      |          |      |      |              |               |        |
| GG                                             | 62    | 38.8 | 149      | 44.0 | 1.0  |              |               |        |
| GA                                             | 94    | 58.8 | 169      | 49.9 | 1.3  | 0.89 to 1.97 | 0.17          |        |
| AA                                             | 4     | 2.5  | 21       | 6.2  | 0.5  | 0.16 to 1.42 | 0.18          |        |
| GA or AA (any A allele)                        | 98    | 61.3 | 190      | 56.1 | 1.2  | 0.82 to 1.78 | 0.33          |        |
| <b><i>OGG1</i> C326G<sup>‡</sup></b>           |       |      |          |      |      |              |               |        |
| CC                                             | 34    | 23.5 | 95       | 28.9 | 1.0  |              |               |        |
| CG                                             | 109   | 75.2 | 229      | 69.6 | 1.4  | 0.86 to 2.23 | 0.18          |        |
| GG                                             | 2     | 1.4  | 5        | 1.5  | 1.2  | 0.22 to 7.03 | 0.80          |        |
| CG or GG (any G allele)                        | 111   | 76.6 | 234      | 71.1 | 1.4  | 0.86 to 2.22 | 0.18          |        |
| <b><u>Joint effects</u></b>                    |       |      |          |      |      |              |               |        |
| <b><i>XRCC1</i> G399A    <i>OGG1</i> C326G</b> |       |      |          |      |      |              |               |        |
| GG                                             | CC    | 14   | 9.7      | 41   | 12.7 | 1.0          |               |        |
| GA                                             | CC    | 19   | 13.1     | 47   | 14.5 | 0.3          | 0.15 to 0.55  | <0.001 |
| AA                                             | CC    | 2    | 1.4      | 4    | 1.2  | 3.5          | 1.10 to 14.60 | 0.03   |
| GG                                             | CG    | 42   | 29.0     | 100  | 30.9 | 0.1          | 0.07 to 0.25  | <0.001 |
| GA                                             | CG    | 56   | 38.6     | 108  | 33.3 | 0.1          | 0.07 to 0.22  | <0.001 |
| AA                                             | CG    | 3    | 2.1      | 15   | 4.6  | 0.9          | 0.42 to 2.07  | 1.00   |
| GG                                             | GG    | 5    | 3.4      | 3    | 0.9  | 4.7          | 1.30 to 25.33 | 0.01   |
| GA                                             | GG    | 2    | 1.4      | 4    | 1.2  | 3.5          | 1.10 to 14.60 | 0.03   |
| AA                                             | GG    | 2    | 1.4      | 2    | 0.6  | 7.0          | 1.61 to 63.46 | 0.004  |
| <i>P-value for interaction = 0.21</i>          |       |      |          |      |      |              |               |        |

\*Crude odds ratio from matched case-control analysis.

<sup>†</sup>DNA samples for *XRCC1* genotyping were successfully carried out for 160 out of 175 cases, and 339 out of 350 controls.

<sup>‡</sup>DNA samples for *OGG1* genotyping were successfully carried out for 145 out of 175 cases, and 329 out of 350 controls.

**Table 2** Univariate analysis of cigarette smoking and alcohol drinking on the risk of cholangiocarcinoma in Khon Kaen, Thailand

| Variables                                                     | Cases |      | Controls |      | OR*  | 95% CI        | P-value |
|---------------------------------------------------------------|-------|------|----------|------|------|---------------|---------|
|                                                               | n     | %    | n        | %    |      |               |         |
| <b>Cigarette smoking</b>                                      |       |      |          |      |      |               |         |
| Non-smoker                                                    | 92    | 42.0 | 230      | 52.5 | 1.0  |               |         |
| Smoker                                                        | 127   | 58.0 | 208      | 47.5 | 2.7  | 1.57 to 4.50  | <0.001  |
| <b>Age at which smoking started of all cigarettes (years)</b> |       |      |          |      |      |               |         |
| Non-smoker                                                    | 92    | 42.0 | 230      | 52.5 | 1.0  |               |         |
| <17                                                           | 28    | 12.8 | 48       | 11.0 | 2.9  | 1.38 to 5.91  | 0.01    |
| 17–19                                                         | 35    | 16.0 | 44       | 10.1 | 3.6  | 1.85 to 7.17  | <0.001  |
| 20–21                                                         | 40    | 18.3 | 70       | 16.0 | 2.5  | 1.33 to 4.62  | 0.004   |
| 22+                                                           | 24    | 11.0 | 46       | 10.5 | 2.4  | 1.19 to 4.73  | 0.01    |
| <i>P-value for trend = 0.002</i>                              |       |      |          |      |      |               |         |
| <b>Alcohol consumption</b>                                    |       |      |          |      |      |               |         |
| No                                                            | 57    | 26.0 | 254      | 58.0 | 1.0  |               |         |
| Yes                                                           | 162   | 74.0 | 184      | 42.0 | 5.7  | 3.61 to 9.04  | <0.001  |
| <b>Units of alcohol per month of all alcohol consumption</b>  |       |      |          |      |      |               |         |
| Non-drinker                                                   | 57    | 26.0 | 254      | 58.0 | 1.0  |               |         |
| <14                                                           | 79    | 36.1 | 92       | 21.0 | 5.2  | 3.15 to 8.43  | <0.001  |
| ≥14                                                           | 83    | 37.9 | 92       | 21.0 | 6.7  | 3.90 to 11.38 | <0.001  |
| <b>Alcohol consumption and smoking</b>                        |       |      |          |      |      |               |         |
| No alcohol, non-smoker                                        | 42    | 19.2 | 178      | 40.6 | 1.0  |               |         |
| No alcohol, smoker                                            | 15    | 6.9  | 76       | 17.4 | 2.2  | 0.93 to 5.00  | 0.07    |
| Alcohol drinker, non-smoker                                   | 50    | 22.8 | 52       | 11.9 | 5.8  | 3.12 to 10.78 | <0.001  |
| Alcohol drinker, smoker                                       | 112   | 51.1 | 132      | 30.1 | 10.4 | 5.07 to 21.16 | <0.001  |
| <i>P-value for trend &lt;0.001</i>                            |       |      |          |      |      |               |         |
| <i>P-value for interaction = 0.68</i>                         |       |      |          |      |      |               |         |

\*Crude odds ratio from matched case-control analysis.

**Table 3** Cases and controls, and odds ratios for cholangiocarcinoma associated with smoking, alcohol drinking, and *XRCC1* and *OGG1* polymorphisms

| Variables                                                    | Cases |      | Controls |      | OR* | OR† | 95% CI‡       | P-value |
|--------------------------------------------------------------|-------|------|----------|------|-----|-----|---------------|---------|
|                                                              | n     | %    | n        | %    |     |     |               |         |
| <b><i>XRCC1</i> G399A polymorphisms§</b>                     |       |      |          |      |     |     |               |         |
| GG                                                           | 62    | 38.8 | 149      | 44.0 | 1.0 | 1.0 |               |         |
| GA                                                           | 94    | 58.8 | 169      | 49.9 | 1.3 | 1.2 | 0.76 to 1.94  | 0.43    |
| AA                                                           | 4     | 2.5  | 21       | 6.2  | 0.5 | 0.4 | 0.10 to 1.62  | 0.20    |
| <b><i>OGG1</i> C326G polymorphisms¶</b>                      |       |      |          |      |     |     |               |         |
| CC                                                           | 34    | 23.4 | 95       | 28.9 | 1.0 | 1.0 |               |         |
| CG                                                           | 109   | 75.2 | 229      | 69.6 | 1.4 | 1.2 | 0.70 to 2.07  | 0.49    |
| GG                                                           | 2     | 1.4  | 5        | 1.5  | 1.2 | 0.7 | 0.10 to 5.11  | 0.75    |
| <b>Cigarette smoking</b>                                     |       |      |          |      |     |     |               |         |
| Non-smoker                                                   | 92    | 42.0 | 230      | 52.5 | 1.0 | 1.0 |               |         |
| Smoker                                                       | 127   | 58.0 | 208      | 47.5 | 2.7 | 1.9 | 0.94 to 4.01  | 0.07    |
| <b>Units of alcohol per month of all alcohol consumption</b> |       |      |          |      |     |     |               |         |
| Non-drinker                                                  | 57    | 26.0 | 254      | 58.0 | 1.0 | 1.0 |               |         |
| <14                                                          | 79    | 36.1 | 92       | 21.0 | 5.2 | 5.2 | 2.74 to 9.95  | <0.001  |
| ≥14                                                          | 83    | 37.9 | 92       | 21.0 | 6.7 | 7.6 | 3.67 to 15.72 | <0.001  |

\*Crude odds ratio from matched case-control analysis.

†Adjusted odds ratio from matched case-control analysis (adjusted for all other variables in the table).

‡95% confidence interval for OR†.

§DNA samples for *XRCC1* genotyping were successfully carried out for 160 out of 175 cases, and 339 out of 350 controls.

¶DNA samples for *OGG1* genotyping were successfully carried out for 145 out of 175 cases, and 329 out of 350 controls.



**Table 4** Gene-environment interactions of *XRCC1* and *OGG1* polymorphisms together with smoking and alcohol drinking on cholangiocarcinoma risk in Khon Kaen, Thailand

| <i>XRCC1</i> | Smoking /<br>Use of alcohol                               | Cases | Controls | OR*  | 95% CI        | P-value       | <i>OGG1</i>  | Smoking /<br>Use of alcohol                               | Cases | Controls | OR*  | 95% CI        | P-value       |
|--------------|-----------------------------------------------------------|-------|----------|------|---------------|---------------|--------------|-----------------------------------------------------------|-------|----------|------|---------------|---------------|
|              |                                                           | n     | n        |      |               |               |              |                                                           | n     | n        |      |               |               |
| <b>G399A</b> | <b>All cigarettes smoking</b>                             |       |          |      |               | <i>0.87</i> † | <b>C326G</b> | <b>All cigarettes smoking</b>                             |       |          |      |               | <i>0.54</i> † |
| GG           | Non-smoker                                                | 22    | 71       | 1.0  |               |               | CC           | Non-smoker                                                | 14    | 55       | 1.0  |               |               |
| GA           | Non-smoker                                                | 48    | 99       | 1.5  | 0.82 to 2.79  | 0.18          | CG           | Non-smoker                                                | 49    | 122      | 1.5  | 0.77 to 2.99  | 0.22          |
| AA           | Non-smoker                                                | 2     | 11       | 0.6  | 0.11 to 2.74  | 0.47          | GG           | Non-smoker                                                | 1     | 1        | —    | —             | —             |
| GG           | Smoker                                                    | 40    | 78       | 2.8  | 1.30 to 5.91  | 0.01          | CC           | Smoker                                                    | 20    | 40       | 3.1  | 1.17 to 8.38  | 0.02          |
| GA           | Smoker                                                    | 46    | 70       | 3.4  | 1.60 to 7.28  | 0.001         | CG           | Smoker                                                    | 60    | 107      | 4.3  | 1.79 to 10.21 | 0.001         |
| AA           | Smoker                                                    | 2     | 10       | 1.2  | 0.21 to 6.29  | 0.86          | GG           | Smoker                                                    | 1     | 4        | 1.5  | 0.14 to 15.44 | 0.74          |
| <b>G399A</b> | <b>Units of alcohol per month of all alcohol drinking</b> |       |          |      |               | <i>0.80</i> † | <b>C326G</b> | <b>Units of alcohol per month of all alcohol drinking</b> |       |          |      |               | <i>0.74</i> † |
| GG           | Non-drinker                                               | 16    | 83       | 1.0  |               |               | CC           | Non-drinker                                               | 10    | 65       | 1.0  |               |               |
| GA           | Non-drinker                                               | 20    | 33       | 4.4  | 1.81 to 10.83 | 0.001         | CG           | Non-drinker                                               | 9     | 9        | 8.1  | 2.30 to 28.36 | 0.001         |
| AA           | Non-drinker                                               | 26    | 33       | 9.2  | 3.65 to 23.21 | <0.001        | GG           | Non-drinker                                               | 15    | 21       | 8.6  | 2.62 to 28.02 | <0.001        |
| GG           | <14                                                       | 22    | 102      | 1.1  | 0.49 to 2.28  | 0.89          | CC           | <14                                                       | 24    | 130      | 1.3  | 0.55 to 3.20  | 0.52          |
| GA           | <14                                                       | 39    | 35       | 8.8  | 3.76 to 20.71 | <0.001        | CG           | <14                                                       | 46    | 58       | 7.0  | 2.85 to 17.39 | <0.001        |
| AA           | <14                                                       | 33    | 32       | 10.3 | 4.14 to 25.80 | <0.001        | GG           | <14                                                       | 39    | 41       | 11.2 | 4.18 to 30.17 | <0.001        |
| GG           | ≥14                                                       | 1     | 12       | 0.4  | 0.05 to 3.71  | 0.44          | CC           | ≥14                                                       | 0     | 1        | —    | —             | —             |
| GA           | ≥14                                                       | 2     | 3        | 2.8  | 0.31 to 25.41 | 0.36          | CG           | ≥14                                                       | 1     | 1        | 7.7  | 0.29 to 26.73 | 0.22          |
| AA           | ≥14                                                       | 1     | 6        | 2.5  | 0.25 to 23.99 | 0.44          | GG           | ≥14                                                       | 1     | 3        | 6.4  | 0.48 to 86.72 | 0.16          |

\*Crude odds ratio from matched case-control analysis.

†P-value for interaction.

## Funding

This research was supported by the Thailand Research Fund (Research grant No. 540102) and the National Research University Project of Thailand, Office of the Higher Education Commission, through the Center of Excellence in Specific Health Problems in Greater Mekong Sub-region (SHeP-GMS), Khon Kaen University (Research grant No. NRU542005).

**Contributors** NS, SP, CP, TE and SW conceived and designed the research. NS and PC performed the research. NS and SP carried out the analyses. All authors contributed to the writing and revisions of the manuscript and approved the final version.

**Competing interests** No conflicts of competing interest.

**Provenance and peer review** Not commissioned; externally peer reviewed.

**Data sharing statement** No additional data are available.

**Ethics approval** Ethical approval was obtained from the Khon Kaen University Ethics Committee for Human Research (Reference No. HE512053).

## Figure Legends

**Figure 1** Polymorphisms in *XRCC1* G399A and *OGGI* C326G were analyzed using PCR with high resolution melting analysis.

## REFERENCES

1. Ferlay J, Shin HR, Bray F, *et al.* GLOBOCAN 2008 v2.0, Cancer Incidence and Mortality Worldwide: IARC CancerBase No.10 (Internet). Lyon, France: IARC; 2010.  
<http://globocan.iarc.fr> (accessed 27 Mar 2013).
2. Khuhaprema T, Attasara P, Sriplung H, *et al.* *Cancer in Thailand Volume VI, 2004-2006*. Bangkok: NCIB, 2012.
3. Parkin DM, Ohshima H, Srivatanakul P, *et al.* Cholangiocarcinoma: epidemiology, mechanisms of carcinogenesis and prevention. *Cancer Epidemiol Biomarkers Prev* 1993;2:537–44.
4. Stern MC, Conti DV, Siegmund KD, *et al.* DNA repair single-nucleotide polymorphisms in colorectal cancer and their role as modifiers of the effect of cigarette smoking and alcohol in the Singapore Chinese Health Study. *Cancer Epidemiol Biomarkers Prev* 2007;16:2363–72.
5. Huang WY, Gao YT, Rashid A, *et al.* Selected base excision repair gene polymorphisms and susceptibility to biliary tract cancer and biliary stones: a population-based case-control study in China. *Carcinogenesis* 2008;29:100–5.
6. Zhang M, Huang WY, Andreotti G, *et al.* Variants of DNA repair genes and the risk of biliary tract cancers and stones: a population-based study in China. *Cancer Epidemiol Biomarkers Prev* 2008;17:2123–7.
7. Srivastava A, Srivastava K, Pandey SN, *et al.* Single-nucleotide polymorphisms of DNA repair genes *OGG1* and *XRCC1*: association with gallbladder cancer in North Indian population. *Ann Surg Oncol* 2009;16:1695–703.

- 1  
2  
3 8. Thanan R, Murata M, Pinlaor S, *et al.* Urinary 8-oxo-7,8-dihydro-2'-deoxyguanosine in  
4 patients with parasite infection and effect of antiparasitic drug in relation to  
5  
6 cholangiocarcinogenesis. *Cancer Epidemiol Biomarkers Prev* 2008;17:518–24.  
7
- 8  
9  
10 9. Dechakhamphu S, Pinlaor S, Sitthithaworn P, *et al.* Lipid peroxidation and etheno DNA  
11 adducts in white blood cells of liver fluke-infected patients: protection by plasma alpha-  
12  
13 tocopherol and praziquantel. *Cancer Epidemiol Biomarkers Prev* 2010;19:310–8.  
14
- 15  
16  
17 10. Zeng L, You G, Tanaka H, *et al.* Combined effects of polymorphisms of DNA-repair protein  
18 genes and metabolic enzyme genes on the risk of cholangiocarcinoma. *Jpn J Clin Oncol*  
19  
20 2013;43: 1190–4.  
21
- 22  
23  
24 11. Songserm N, Promthet S, Sithithaworn P, *et al.* *MTHFR* Polymorphisms and *Opisthorchis*  
25  
26 *viverrini* Infection: a Relationship with Increased Susceptibility to Cholangiocarcinoma in  
27  
28 Thailand. *Asian Pac J Cancer Prev* 2011;12:1341–5.  
29
- 30  
31  
32 12. Songserm N, Promthet S, Sithithaworn P, *et al.* Risk factors for cholangiocarcinoma in high-  
33  
34 risk area of Thailand: Role of lifestyle, diet and methylenetetrahydrofolate reductase  
35  
36 polymorphisms. *Cancer Epidemiol* 2012;36:e89–94.  
37
- 38  
39  
40 13. Kosti O, Byrne C, Meeker KL, *et al.* Mutagen sensitivity, tobacco smoking and breast cancer  
41  
42 risk: a case-control study. *Carcinogenesis* 2010;31:654–9.  
43
- 44  
45  
46 14. Rouissi K, Ouerhani S, Hamrita B, *et al.* Smoking and polymorphisms in xenobiotic  
47  
48 metabolism and DNA repair genes are additive risk factors affecting bladder cancer in  
49  
50 Northern Tunisia. *Pathol Oncol Res* 2011;17:879–86.  
51
- 52  
53  
54 15. Mena S, Ortega A, Estrela JM. Oxidative stress in environmental-induced carcinogenesis.  
55  
56  
57 *Mutat Res* 2009;674:36–44.  
58
- 59  
60 16. Pelucchi C, Tramacere I, Boffetta P, *et al.* Alcohol consumption and cancer risk. *Nutr*  
*Cancer* 2011;63:983–90.

- 1  
2  
3 17. Parkin DM, Srivatanakul P, Khlat M, *et al.* Liver cancer in Thailand. I. A case-control study  
4  
5 of cholangiocarcinoma. *Int J Cancer* 1991;48:323–8.  
6  
7
- 8 18. Chernrungrroj G. Risk factors for cholangiocarcinoma: a case-control study (dissertation).  
9  
10 Connecticut: Yale University, 2000.  
11
- 12 19. Honjo S, Srivatanakul P, Sriplung H, *et al.* Genetic and environmental determinants of risk  
13 for cholangiocarcinoma via *Opisthorchis viverrini* in a densely infested area in Nakhon  
14 Phanom, northeast Thailand. *Int J Cancer* 2005;117:854–60.  
15  
16  
17
- 18 20. Poomphakwaen K, Promthet S, Kamsa-Ard S, *et al.* Risk factors for cholangiocarcinoma in  
19 Khon Kaen, Thailand: a nested case-control study. *Asian Pac J Cancer Prev* 2009;10:251–8.  
20  
21  
22
- 23 21. Chalasani N, Baluyut A, Ismail A, *et al.* Cholangiocarcinoma in patients with primary  
24 sclerosing cholangitis: a multicenter case-control study. *Hepatology* 2000;31:7–11.  
25  
26  
27
- 28 22. Sriamporn S, Parkin DM, Pisani P, *et al.* A prospective study of diet, lifestyle, and genetic  
29 factors and the risk of cancer in Khon Kaen Province, northeast Thailand: description of the  
30 cohort. *Asian Pac J Cancer Prev* 2005;6:295–303.  
31  
32  
33
- 34 23. Kietthubthew S, Sriplung H, Au WW, *et al.* Polymorphism in DNA repair genes and oral  
35 squamous cell carcinoma in Thailand. *Int J Hyg Environ Health* 2006;209:21–9.  
36  
37  
38
- 39 24. Sangrajrang S, Schmezer P, Burkholder I, *et al.* Polymorphisms in three base excision repair  
40 genes and breast cancer risk in Thai women. *Breast Cancer Res Treat* 2008;111:279–88.  
41  
42  
43
- 44 25. Settheetham-Ishida W, Yuenyao P, Natphopsuk S, *et al.* Genetic Risk of DNA Repair Gene  
45 Polymorphisms (*XRCC1* and *XRCC3*) for High Risk Human Papillomavirus Negative  
46 Cervical Cancer in Northeast Thailand. *Asian Pac J Cancer Prev* 2011;12:963–6.  
47  
48  
49
- 50 26. Klinchid J, Chewaskulyoung B, Saeteng S, *et al.* Effect of combined genetic polymorphisms  
51 on lung cancer risk in northern Thai women. *Cancer Genet Cytogenet* 2009;195:143–9.  
52  
53  
54  
55  
56  
57  
58  
59  
60

- 1  
2  
3  
4  
5  
6  
7  
8  
9  
10  
11  
12  
13  
14  
15  
16  
17  
18  
19  
20  
21  
22  
23  
24  
25  
26  
27  
28  
29  
30  
31  
32  
33  
34  
35  
36  
37  
38  
39  
40  
41  
42  
43  
44  
45  
46  
47  
48  
49  
50  
51  
52  
53  
54  
55  
56  
57  
58  
59  
60
27. Mohrenweiser HW, Wilson DM 3rd, Jones IM. Challenges and complexities in estimating both the functional impact and the disease risk associated with the extensive genetic variation in human DNA repair genes. *Mutat Res* 2003;526:93–125.
28. Lunn RM, Langlois RG, Hsieh LL, *et al.* *XRCC1* polymorphisms: effects on aflatoxin B1-DNA adducts and glycophorin A variant frequency. *Cancer Res* 1999;59:2557–61.
29. Duell EJ, Millikan RC, Pittman GS, *et al.* Polymorphisms in the DNA repair gene *XRCC1* and breast cancer. *Cancer Epidemiol Biomarkers Prev* 2001;10:217–22.
30. Matullo G, Guarrera S, Carturan S, *et al.* DNA repair gene polymorphisms, bulky DNA adducts in white blood cells and bladder cancer in a case-control study. *Int J Cancer* 2001;92:562–7.
31. Vodicka P, Stetina R, Polakova V, *et al.* Association of DNA repair polymorphisms with DNA repair functional outcomes in healthy human subjects. *Carcinogenesis* 2007;28:657–64.

1  
2  
3 **Gene-environment interaction involved in cholangiocarcinoma in Thai population:**  
4  
5 **polymorphisms of DNA repair genes, smoking and use of alcohol**  
6  
7  
8  
9

10 **Corresponding author**

11 Professor Supanee Promthet, Department of Epidemiology, Faculty of Public Health, Khon

12 Kaen University, Khon Kaen, 40002, Thailand

13 Phone: +66(0) 43-347057; Fax +66(0) 43-347058; E-mail: supanee@kku.ac.th  
14  
15  
16  
17  
18  
19  
20  
21  
22

23 **Author names**

24 Nopparat Songserm,<sup>1</sup> Supanee Promthet,<sup>2</sup> Chamsai Pientong,<sup>3</sup> Tipaya Ekalaksananan,<sup>3</sup>

25  
26  
27  
28  
29  
30  
31  
32  
33  
34  
35  
36  
37  
38  
39  
40  
41  
42  
43  
44  
45  
46  
47  
48  
49  
50  
51  
52  
53  
54  
55  
56  
57  
58  
59  
60  
Peechanika Chopjitt,<sup>3</sup> Surapon Wiangnon,<sup>4,5</sup>

32 **Author affiliations**

33  
34  
35  
36  
37  
38  
39  
40  
41  
42  
43  
44  
45  
46  
47  
48  
49  
50  
51  
52  
53  
54  
55  
56  
57  
58  
59  
60  
<sup>1</sup>Department of Community Health, Faculty of Public Health, Ubon Ratchathani Rajabhat  
University, Thailand

<sup>2</sup>Department of Epidemiology, Faculty of Public Health, Khon Kaen University, Thailand

<sup>3</sup>Department of Microbiology, Faculty of Medicine, Khon Kaen University, Thailand

<sup>4</sup>Department of Paediatrics, Faculty of Medicine, Khon Kaen University, Thailand

<sup>5</sup>Cancer Unit, Faculty of Medicine, Khon Kaen University, Thailand

51 **Keywords:** Cholangiocarcinoma, Polymorphisms, DNA repair genes, Smoking, Alcohol  
52  
53  
54  
55  
56  
57  
58  
59  
60  
drinking

**Word count:** 2759 words

## ABSTRACT

**Objective:** Cholangiocarcinoma (CCA) is the most common malignancy in a Northeast Thai population. Smoking and alcohol drinking are associated with production of free radical intermediates, which can cause several types of DNA lesions. Reduced repair of these DNA lesions would constitute an important risk factor for cancer development. We therefore examined that whether polymorphisms in DNA base-excision repair (BER) genes, *XRCC1* G399A and *OGG1* C326G, were associated with CCA risk and whether they modified the effect of smoking and alcohol drinking in Thai population.

**Design:** A nested case-control study within cohort study was conducted: 219 subjects with primary CCA were each matched with two non-cancer controls from the same cohort on sex, age at recruitment and presence/absence of *Opisthorchis viverrini* eggs in stools. Smoking and alcohol consumption were assessed on recruitment. Polymorphisms in BER genes were analyzed using a polymerase chain reaction with high resolution melting analysis. The associations were assessed using conditional logistic regression.

**Results:** Our results suggest that in Thai population polymorphisms in *XRCC1* and *OGG1* genes, particularly in combination, are associated with increased susceptibility to CCA, and that their role as modifiers of the effect of smoking and alcohol consumption influences the risk of CCA.

**Conclusions:** Better ways of reducing habitual smoking and alcohol consumption, targeted toward subgroups which are genetically susceptible, are recommended. CCA is multi-factorial disease, and a comprehensive approach is needed for its effective prevention. This approach would also have the additional advantage of reducing the onset of other cancers.



### Strengths and limitations of this study

- This was a nested case-control study within the cohort study. This design has the advantage of minimising a systematic recall bias which can occur when the receipt of diagnosis of cancer leads to subjects modifying their self-reported personal histories, in this case, their recall of cigarette smoking and alcohol consumption. This was prevented in the present study because subjects were interviewed at the time of recruitment, before case or control status was defined.
- The diagnosis of cholangiocarcinoma was not histologically confirmed in all the cases.
- This study did not include the population aged 70 years and above.
- In future research, larger samples are needed to increase the power of the studies.

## INTRODUCTION

The data from GLOBOCAN 2008 shows that liver cancer is the fourth most common cause of death from cancer worldwide.<sup>1</sup> It is the most common cancer in Northeast Thailand, where the great majority of cases are cholangiocarcinomas (CCA).<sup>2</sup> Data from the Khon Kaen Cancer Registry (KKCR) have shown that the estimated age-standardised incidence rates for men and women are 84.6 and 36.8 per 100 000, respectively.<sup>3</sup>

Among several types of DNA damage induced by carcinogens from tobacco and alcohol are oxidative base damage and single-strand breaks, which are repaired by the base-excision repair pathway (BER).<sup>4</sup> Genetic variants and polymorphisms in DNA repair pathways have been reported to affect the levels of DNA lesions, which accumulate in the epithelial tissue of the hepatobiliary tract system, thus influencing the susceptibility to biliary tract cancers and stones in a Chinese population<sup>5, 6</sup> and gallbladder cancer in an Indian population.<sup>7</sup> **There were very few studies** on this topic in relation to CCA in Thai population, but there have been studies, which clarify the role of the accumulation of levels of oxidative DNA lesions in liver fluke-infected- and CCA patients<sup>8-10</sup>; these studies concluded that some biomarkers from oxidative DNA lesions induced by liver fluke infection – a major risk factor – may play an important role in CCA development. However, the results from our previous study showed that not only liver fluke infection but also certain lifestyle and dietary co-factors were associated with increased risk of CCA.<sup>11, 12</sup> Long-term smoking<sup>13, 14</sup> and alcohol drinking<sup>4, 15, 16</sup> are associated with production of free radical intermediates, which can cause several kinds of DNA lesions. Reduced repair of these DNA lesions would constitute an important risk factor for cancer development. With respect to genetic factors, a number of polymorphisms in various DNA repair genes have been discovered, and it is possible that these polymorphisms may affect DNA repair capacity and thus modulate susceptibility to cancer. Investigations are therefore needed into the different patterns of

1  
2  
3 smoking and alcohol drinking in relation to susceptibility to CCA, along with DNA repair  
4  
5 capacity induced by genetic variations or polymorphisms.  
6  
7

8 Although cigarette smoking was not associated with CCA development in the previous  
9  
10 studies conducted in Thailand<sup>12, 17-20</sup> and elsewhere,<sup>21</sup> a modifying effect by DNA repair genes  
11  
12 remains a possibility. With respect to the use of alcohol, this was related to a substantially  
13  
14 increased risk of CCA in our previous study.<sup>12</sup> At the molecular level, it is known that single-  
15  
16 nucleotide polymorphisms (SNPs) in genes participate biochemically in the base-excision repair  
17  
18 pathway (X-ray repair cross-complementing group 1: *XRCC1* and 8-oxoguanine DNA  
19  
20 glycosylase 1: *OGG1*), which repairs smoking- and alcohol-induced oxidative DNA base  
21  
22 modifications.<sup>4</sup>  
23  
24  
25  
26

27 In this present study, we therefore investigated whether polymorphisms in DNA base-  
28  
29 excision repair genes (*XRCC1* G399A and *OGG1* C326G) are associated with CCA risk and  
30  
31 whether their effects are modified by cigarette smoking and alcohol drinking in a Northeastern  
32  
33 Thai population residing in a high-incidence area of opisthorchiasis-related CCA. The selection  
34  
35 of these SNPs in DNA base-excision repair genes was based on their putative effect on protein  
36  
37 function and/or previous evidence of associations with the risk of hepatobiliary tract cancers in  
38  
39 Asian, Chinese and Indian populations<sup>5-7</sup> and the combined effects of a DNA-repair gene and  
40  
41 metabolic gene polymorphisms on CCA risk in Thailand.<sup>10</sup> However, these studies involved only  
42  
43 gene-gene interactions. There is need for studies of gene-environment interactions, especially  
44  
45 between DNA-repair genes and exposure to the carcinogenic effects of tobacco/alcohol  
46  
47 carcinogens in relation to CCA risk.  
48  
49  
50  
51  
52  
53  
54  
55  
56  
57  
58  
59  
60

## MATERIALS AND METHODS

### Study subjects

This was a case-control study nested within the 23 584 Khon Kaen Cohort Study (KKCS). Details of the KKCS and the selection of CCA cases and controls used in the present study have been previously reported.<sup>11, 12, 22</sup> Briefly, 219 cohort members who had developed a primary CCA, diagnosis at least by ultrasound, with or without contrast radiology, tumour markers (such as CA19-9) or histopathology, six or more months after enrollment were identified. The vital status and date of death of potential cases were ascertained by linkage to the files of deaths in Thailand, which are held in the database of the National Health Security Office and the demographic database of Ministry of Interior. All cases had died within two years of diagnosis. Two non-cancer controls from the same cohort population were randomly selected for matching with each case on sex, age at recruitment ( $\pm 3$  years) and presence/absence of liver fluke eggs in the faeces at recruitment (detected by the formalin ethyl acetate concentration technique). This research was approved by the Khon Kaen University Ethics Committee for Human Research (Reference No. HE512053).

### Assessment of cigarette smoking and alcohol drinking

Definitions of alcohol use, cigarette smoking and levels of consumption of alcohol were the same as those previously described.<sup>12</sup> A smoker was defined as someone who had ever smoked any type of cigarette on a daily basis. However, in the present study smokers were categorized into four groups according to age when they began smoking. The 1<sup>st</sup>, 2<sup>nd</sup> and 3<sup>rd</sup> quartiles obtained from the control group frequency distribution for age of starting to smoke were used as the cut-offs for the four groups.

1  
2  
3 Ever drinkers were defined as those who consumed at least one type of alcoholic beverage  
4 (beer, *Sato*, white whisky, red whisky and other whiskies) at least once a month; those drinking  
5 less than this were defined as non-drinkers. The consumption of each subject was calculated in  
6 terms of units of alcohol, where a unit corresponds to 10 ml (approximately 8 gm) of ethanol.  
7  
8 The number of units of alcohol in a drink was determined by multiplying volume of the drink (in  
9 milliliters) by its alcohol percentage (beer 5.0%, *Sato* 7.0%, white whisky 40%, red whisky 35%)  
10 and dividing by 1000. Drinkers were dichotomized according to units of alcohol consumed per  
11 month on the basis of the median monthly consumption for the controls.  
12  
13  
14  
15  
16  
17  
18  
19  
20  
21  
22  
23

## 24 **Laboratory methods**

### 25 *Specimen collection and DNA extraction*

26  
27 Blood samples (buffy coat) were available for 175 (80%) of the 219 eligible CCA cases;  
28 specimens were retrieved from the KKCS bio-bank for these cases and for the 350 matched  
29 controls. Genomic DNA was extracted from buffy coat fractions using the standard protocols of  
30 Genomic DNA Mini Kit with Proteinase K (Geneaid Biotech). Of those with DNA samples,  
31 genotyping was successfully carried out for 95% (499 out of 525) of all samples for *XRCC1* and  
32 for 90% (474 out of 525) of all samples for *OGGI*. Laboratory personnel were blinded to the  
33 case-control status of the available samples.  
34  
35  
36  
37  
38  
39  
40  
41  
42  
43  
44  
45  
46  
47

### 48 *PCR amplification and genetic polymorphisms detection*

49  
50 The real-time polymerase chain reactions with high resolution melting analysis (Real-time  
51 PCR-HRM) technique of DNA amplification for the DNA base-excision repair genes (*XRCC1*  
52 and *OGGI*) polymorphisms were performed in a 96-well plate in the LightCycler<sup>®</sup> 480 Real-  
53 Time PCR System.  
54  
55  
56  
57  
58  
59  
60

1  
2  
3 The amplification of *XRCC1* G399A used two primers, [F]:5'-AGT GGG TGC TGG  
4 ACT GTC-3' and [R]:5'-TTG CCC AGC ACA GGA TAA-3', and was performed in a  
5 LightCycler® 480 Real-Time PCR System with a final volume of 20 µl containing 10 µl of  
6 master mix, 4.4 µl of H<sub>2</sub>O, 3 mM of MgCl<sub>2</sub>, 0.3 µM of each primer and 200 ng of the DNA  
7 template. The amplification of the *OGGI* C326G was performed in the same way, but the  
8 primers were [F]:5'-CCT ACA GGT GCT GTT CAG T-3' and [R]:5'-CCT TTG GAA CCC TTT  
9 CTG-3'.  
10  
11  
12  
13  
14  
15  
16  
17  
18

19 HRM data were analyzed using the LightCycler 480® Gene Scanning Software version  
20 1.5 (Roche). Normalized and temperature-shifted melting curves carrying a sequence variation  
21 were evaluated and compared with the wild-type sample. Sequence variations were distinguished  
22 by different shape of melting curves (Figure 1(A) for *XRCC1* G399A and (B) for *OGGI* C326G).  
23 Melting peaks of sequence variation were analyzed and compared with the wild-type sample.  
24 Different plots were distinguished by different melting peaks for each genotype (Figure 1(C) for  
25 *XRCC1* G399A and (D) for *OGGI* C326G). To improve the genotyping quality and validation,  
26 genotyping of 10% of random samples was confirmed by the PCR with restriction fragment  
27 length polymorphism techniques (PCR-RFLP).  
28  
29  
30  
31  
32  
33  
34  
35  
36  
37  
38  
39  
40  
41  
42

### 43 **Statistical analysis**

44 To assess the strength of the associations between polymorphisms in DNA base-excision repair  
45 genes (*XRCC1* and *OGGI*) and the risk of CCA, odds ratio (ORs) with 95% confidence intervals  
46 (CIs) were estimated using conditional logistic regression. A univariate analysis using  
47 McNemar's chi-square test and conditional logistic regression was carried out to explore the  
48 associations between DNA-repair genes polymorphisms, smoking and alcohol drinking, and the  
49 risk of CCA. Factors found to have a strong association with CCA in the univariate analysis (p  
50  
51  
52  
53  
54  
55  
56  
57  
58  
59  
60

1  
2  
3 <0.05), and factors without association in the univariate analysis, but found to play important  
4 roles as factors for CCA risk from literature reviews, were included in the multivariate analysis.  
5  
6 Possible modifications of the effects of smoking and alcohol drinking by polymorphisms in  
7  
8 *XRCCI* G399A and *OGGI* C326G were also analyzed. A *P*-value <0.05 was considered  
9  
10 statistically significant. All statistical analyses were performed with a statistical package, STATA  
11  
12 version 10 (Stata, College Station, TX).  
13  
14  
15  
16  
17  
18  
19

## 20 RESULTS

21  
22 There were 219 cohort members who had developed a primary CCA six or more months after  
23 enrollment into the KKCS. They comprised 92 females and 127 males, with a median age of 57  
24 years (minimum 31, maximum 69). There were two controls matched by age and sex for each  
25 case. Table 1 shows the distribution of *XRCCI* G399A and *OGGI* C326G polymorphisms in  
26 cases and controls, the joint distribution of those polymorphisms, and the associated odds ratios.  
27  
28 While there were no associations between any of these individual polymorphisms and the risk of  
29 CCA, the combinations of *XRCCI* GA heterozygous and *OGGI* CC wild-type or CG  
30 heterozygous, and of *XRCCI* GG wild-type and *OGGI* CG heterozygous, were significantly  
31 related to a reduced risk of CCA (*P*-value <0.001). Conversely, the combinations of the *OGGI*  
32 GG mutant, homozygous with all three genotypes of *XRCCI* (wild-type, heterozygous and  
33 mutant homozygous), were significantly associated with an increased risk of CCA (*P*-value =  
34 0.01, 0.03 and 0.004, respectively), but there were no interactions between the polymorphisms of  
35  
36  
37  
38  
39  
40  
41  
42  
43  
44  
45  
46  
47  
48  
49  
50  
51  
52  
53  
54  
55  
56  
57  
58  
59  
60

53 In the univariate analysis (Table 2), there were significant associations between cigarette  
54 smoking and alcohol consumption and the risk of CCA, and their joint effect appeared to be  
55  
56  
57  
58  
59  
60

1  
2  
3 multiplicative with no interactions between them. There was trend in risk with smoking  
4  
5 frequency or number of years of habitual smoking ( $P$ -value for trend = 0.002).  
6  
7

8 In the multivariate analysis (Table 3), shows the adjusted ORs and 95% CIs from the  
9  
10 multivariate analysis. There was a clear association with alcohol drinking: compared with non-  
11  
12 drinkers, individuals who consumed <14 units of alcohol per month had an increased risk of CCA  
13  
14 (OR=5.2, 95% CI 2.74 to 9.95), and the risk was higher still in those who consumed  $\geq$ 14 units of  
15  
16 alcohol per month (OR=7.6, 95% CI 3.67 to 15.72).  
17  
18  
19

20 Table 4 shows the results of gene-environment interaction of the *XRCC1* and *OGGI*  
21  
22 polymorphisms along with smoking and alcohol drinking on the risk of CCA. When compared  
23  
24 with the reference subjects (nonsmokers with the *XRCC1* GG wild-type), smokers carrying the  
25  
26 *XRCC1* GG wild-type had an increased susceptibility to CCA (OR=2.8, 95% CI 1.30 to 5.91),  
27  
28 and this was higher still in smokers with GA heterozygous (OR=3.4, 95% CI 1.60 to 7.28).  
29  
30 Moreover, smokers with the *OGGI* CC wild-type and CG heterozygous had an increased risk of  
31  
32 CCA compared with nonsmokers with the wild-type. With respect to alcohol consumption, some  
33  
34 combinations of alcohol drinking and mutant polymorphisms of both *XRCC1* and *OGGI* were  
35  
36 statistically significant. For example, compared with the reference group (nondrinkers with the  
37  
38 *XRCC1* GG wild-type), subjects with the *XRCC1* GA heterozygous who were nondrinkers or  
39  
40 drinkers (<14 units of alcohol per month) had an increased susceptibility to CCA (4.4-fold  
41  
42 increased to 8.8-fold). Similarly, subjects with the *XRCC1* AA variant genotype had an increased  
43  
44 risk of CCA (9.2-fold in nondrinkers increased to 10.3-fold in drinkers of <14 units of alcohol per  
45  
46 month). Again, there were no interactions between *XRCC1* or *OGGI* polymorphisms and  
47  
48 smoking or alcohol drinking.  
49  
50  
51  
52  
53  
54  
55  
56  
57  
58  
59  
60



## DISCUSSION

This was a case-control study nested within the 23 584 Khon Kaen Cohort Study (KKCS).<sup>11, 12, 22</sup>

The design of this study minimises recall bias of cigarette smoking and alcohol drinking, as subjects were interviewed at the time of recruitment, before case or control status was defined.

This design is very useful for examining the role of self-reported factors such as cigarette smoking and alcohol consumption, which are modified when cancer is present.

Smoking was not associated with CCA development in this present study (after adjustment for all other variables in the multivariate analysis) – polymorphisms in *XRCC1* and *OGG1*, cigarette smoking and units of alcohol per month of all alcohol consumption.

Alcohol consumption was significantly associated with an increased risk of CCA in previous studies in Thailand<sup>18, 19</sup> and elsewhere.<sup>21</sup> Alcohol may affect metabolic pathways of endogenous and exogenous nitrosamines<sup>16, 19</sup> and it is associated with production of free radical intermediate, which can cause several kinds of DNA lesions.<sup>4, 15, 16</sup> Reduced repair of these DNA lesions would therefore constitute a major risk factor for cancer development.<sup>15, 16</sup>

The genotype frequencies of *XRCC1* and *OGG1* polymorphisms found in the controls for the present study were consistent with those found in other studies in Thailand: the prevalence of G allele of *XRCC1* codon 399 was 68.88% in the present study compared with 36.59%–73.20% in other studies<sup>10, 23-25</sup> and A allele of *XRCC1* codon 399 was 31.12% in controls (prevalence of A allele was 26.80%–52.56%). In our analysis of the *OGG1* codon 326, the genotype distribution in the controls deviated from the Hardy–Weinberg equilibrium. Genotype frequency of *OGG1* C326G in controls was slightly higher than rates noted in reports from other studies in Thailand.<sup>10, 24, 26</sup> The C allele of *OGG1* codon 326 was 63.68% in controls (C allele prevalence was between 50.12%–55.00%) and G allele of *OGG1* codon 326 was 36.32% in controls (prevalence of G allele in *OGG1* codon 326 was between 45.00%–49.88%).

1  
2  
3  
4  
5  
6  
7  
8  
9  
10  
11  
12  
13  
14  
15  
16  
17  
18  
19  
20  
21  
22  
23  
24  
25  
26  
27  
28  
29  
30  
31  
32  
33  
34  
35  
36  
37  
38  
39  
40  
41  
42  
43  
44  
45  
46  
47  
48  
49  
50  
51  
52  
53  
54  
55  
56  
57  
58  
59  
60

*XRCCI* and *OGGI* are major DNA repair genes involved in BER. Mutations and polymorphisms in DNA repair genes, which affect the efficiency of DNA damage repair, may increase an individual's susceptibility to several cancers<sup>23-26</sup> including cancers of the hepatobiliary tract.<sup>5-7</sup> However, no studies on this topic have been conducted in relation to CCA susceptibility and especially not in Thailand where the incidence of CCA is highest in the world.<sup>17</sup> However, there are four studies in a Thai population, which investigated relationships between the BER gene polymorphisms and other common cancers. Whereas *XRCCI* G399A polymorphisms tend to be associated with a reduced risk of oral squamous cell carcinoma,<sup>23</sup> they are associated with increased risks of breast<sup>24</sup> and cervical cancers,<sup>25</sup> and *OGGI* C326G polymorphisms tend to be related to increased risks of breast<sup>24</sup> and lung cancers.<sup>26</sup>

Several studies have explored the associations between polymorphisms of the DNA repair genes involved in BER (*XRCCI* G399A and *OGGI* C326G) and the risk of various cancers, but they have shown inconsistent results. This may be the consequence of the different modifying effects, which these polymorphisms have on the balance during the DNA repair process. Imbalance in the tightly regulated process can be caused by SNPs and will result in deficient DNA repair and an increase in DNA breaks.<sup>27</sup> The *XRCCI* codon 399 A allele and the *OGGI* 326 G allele have been associated with a reduced capacity of the DNA repair process as detected by the persistence of DNA bulky adducts<sup>28-30</sup> and  $\gamma$ -irradiation induced oxidative DNA damage.<sup>31</sup> In addition, the balance may be modified by smoking- and alcohol-induced oxidative DNA base modifications interacting with the repair inefficiency of BER polymorphisms<sup>4</sup>; for example, the *XRCCI* GA variant heterozygous carriers, who were nondrinkers or drinkers of <14 units of alcohol per month, had an increased susceptibility to CCA (4.4-fold in nondrinkers increase to

1  
2  
3 8.8-fold in drinkers) when compared with nondrinkers carrying the *XRCC1* GG wild-type (Table  
4  
5  
6 4).

7  
8 In conclusion, this study is the first report of possible associations between the main  
9  
10 polymorphisms in BER genes (*XRCC1* G399A, *OGGI* C326G), the joint effects of both genes,  
11  
12 and their modification of the effects of cigarette smoking and alcohol drinking on CCA risk in a  
13  
14 Thai population. Our results suggest that polymorphisms in *XRCC1* and *OGGI* genes,  
15  
16 particularly in combination, were associated with increased susceptibility to CCA. CCA is a  
17  
18 multifaceted disease requiring a broad range of preventative actions. In the context of the present  
19  
20 study, there is a need for more effective programmes for smoking cessation and reducing alcohol  
21  
22 consumption, targeted especially at subgroups which are genetically at particular risk for CCA.  
23  
24  
25  
26  
27 Such an approach could also help in the prevention of other forms of cancer.  
28  
29  
30  
31  
32  
33  
34  
35  
36  
37  
38  
39  
40  
41  
42  
43  
44  
45  
46  
47  
48  
49  
50  
51  
52  
53  
54  
55  
56  
57  
58  
59  
60

**Table 1** Univariate analysis of *XRCC1* and *OGG1* polymorphisms with the risk of cholangiocarcinoma in Khon Kaen, Thailand

| Genetic polymorphisms                          | Cases |      | Controls |      | OR*  | 95% CI       | P-value       |        |
|------------------------------------------------|-------|------|----------|------|------|--------------|---------------|--------|
|                                                | n     | %    | n        | %    |      |              |               |        |
| <b><i>XRCC1</i> G399A<sup>†</sup></b>          |       |      |          |      |      |              |               |        |
| GG                                             | 62    | 38.8 | 149      | 44.0 | 1.0  |              |               |        |
| GA                                             | 94    | 58.8 | 169      | 49.9 | 1.3  | 0.89 to 1.97 | 0.17          |        |
| AA                                             | 4     | 2.5  | 21       | 6.2  | 0.5  | 0.16 to 1.42 | 0.18          |        |
| GA or AA (any A allele)                        | 98    | 61.3 | 190      | 56.1 | 1.2  | 0.82 to 1.78 | 0.33          |        |
| <b><i>OGG1</i> C326G<sup>‡</sup></b>           |       |      |          |      |      |              |               |        |
| CC                                             | 34    | 23.5 | 95       | 28.9 | 1.0  |              |               |        |
| CG                                             | 109   | 75.2 | 229      | 69.6 | 1.4  | 0.86 to 2.23 | 0.18          |        |
| GG                                             | 2     | 1.4  | 5        | 1.5  | 1.2  | 0.22 to 7.03 | 0.80          |        |
| CG or GG (any G allele)                        | 111   | 76.6 | 234      | 71.1 | 1.4  | 0.86 to 2.22 | 0.18          |        |
| <b><u>Joint effects</u></b>                    |       |      |          |      |      |              |               |        |
| <b><i>XRCC1</i> G399A    <i>OGG1</i> C326G</b> |       |      |          |      |      |              |               |        |
| GG                                             | CC    | 14   | 9.7      | 41   | 12.7 | 1.0          |               |        |
| GA                                             | CC    | 19   | 13.1     | 47   | 14.5 | 0.3          | 0.15 to 0.55  | <0.001 |
| AA                                             | CC    | 2    | 1.4      | 4    | 1.2  | 3.5          | 1.10 to 14.60 | 0.03   |
| GG                                             | CG    | 42   | 29.0     | 100  | 30.9 | 0.1          | 0.07 to 0.25  | <0.001 |
| GA                                             | CG    | 56   | 38.6     | 108  | 33.3 | 0.1          | 0.07 to 0.22  | <0.001 |
| AA                                             | CG    | 3    | 2.1      | 15   | 4.6  | 0.9          | 0.42 to 2.07  | 1.00   |
| GG                                             | GG    | 5    | 3.4      | 3    | 0.9  | 4.7          | 1.30 to 25.33 | 0.01   |
| GA                                             | GG    | 2    | 1.4      | 4    | 1.2  | 3.5          | 1.10 to 14.60 | 0.03   |
| AA                                             | GG    | 2    | 1.4      | 2    | 0.6  | 7.0          | 1.61 to 63.46 | 0.004  |
| <i>P-value for interaction = 0.21</i>          |       |      |          |      |      |              |               |        |

\*Crude odds ratio from matched case-control analysis.

<sup>†</sup>DNA samples for *XRCC1* genotyping were successfully carried out for 160 out of 175 cases, and 339 out of 350 controls.

<sup>‡</sup>DNA samples for *OGG1* genotyping were successfully carried out for 145 out of 175 cases, and 329 out of 350 controls.

**Table 2** Univariate analysis of cigarette smoking and alcohol drinking on the risk of cholangiocarcinoma in Khon Kaen, Thailand

| Variables                                                     | Cases |      | Controls |      | OR*  | 95% CI        | P-value |
|---------------------------------------------------------------|-------|------|----------|------|------|---------------|---------|
|                                                               | n     | %    | n        | %    |      |               |         |
| <b>Cigarette smoking</b>                                      |       |      |          |      |      |               |         |
| Non-smoker                                                    | 92    | 42.0 | 230      | 52.5 | 1.0  |               |         |
| Smoker                                                        | 127   | 58.0 | 208      | 47.5 | 2.7  | 1.57 to 4.50  | <0.001  |
| <b>Age at which smoking started of all cigarettes (years)</b> |       |      |          |      |      |               |         |
| Non-smoker                                                    | 92    | 42.0 | 230      | 52.5 | 1.0  |               |         |
| <17                                                           | 28    | 12.8 | 48       | 11.0 | 2.9  | 1.38 to 5.91  | 0.01    |
| 17–19                                                         | 35    | 16.0 | 44       | 10.1 | 3.6  | 1.85 to 7.17  | <0.001  |
| 20–21                                                         | 40    | 18.3 | 70       | 16.0 | 2.5  | 1.33 to 4.62  | 0.004   |
| 22+                                                           | 24    | 11.0 | 46       | 10.5 | 2.4  | 1.19 to 4.73  | 0.01    |
| <i>P-value for trend = 0.002</i>                              |       |      |          |      |      |               |         |
| <b>Alcohol consumption</b>                                    |       |      |          |      |      |               |         |
| No                                                            | 57    | 26.0 | 254      | 58.0 | 1.0  |               |         |
| Yes                                                           | 162   | 74.0 | 184      | 42.0 | 5.7  | 3.61 to 9.04  | <0.001  |
| <b>Units of alcohol per month of all alcohol consumption</b>  |       |      |          |      |      |               |         |
| Non-drinker                                                   | 57    | 26.0 | 254      | 58.0 | 1.0  |               |         |
| <14                                                           | 79    | 36.1 | 92       | 21.0 | 5.2  | 3.15 to 8.43  | <0.001  |
| ≥14                                                           | 83    | 37.9 | 92       | 21.0 | 6.7  | 3.90 to 11.38 | <0.001  |
| <b>Alcohol consumption and smoking</b>                        |       |      |          |      |      |               |         |
| No alcohol, non-smoker                                        | 42    | 19.2 | 178      | 40.6 | 1.0  |               |         |
| No alcohol, smoker                                            | 15    | 6.9  | 76       | 17.4 | 2.2  | 0.93 to 5.00  | 0.07    |
| Alcohol drinker, non-smoker                                   | 50    | 22.8 | 52       | 11.9 | 5.8  | 3.12 to 10.78 | <0.001  |
| Alcohol drinker, smoker                                       | 112   | 51.1 | 132      | 30.1 | 10.4 | 5.07 to 21.16 | <0.001  |
| <i>P-value for trend &lt;0.001</i>                            |       |      |          |      |      |               |         |
| <i>P-value for interaction = 0.68</i>                         |       |      |          |      |      |               |         |

\*Crude odds ratio from matched case-control analysis.

**Table 3** Cases and controls, and odds ratios for cholangiocarcinoma associated with smoking, alcohol drinking, and *XRCC1* and *OGG1* polymorphisms

| Variables                                                    | Cases |      | Controls |      | OR* | OR† | 95% CI‡       | P-value |
|--------------------------------------------------------------|-------|------|----------|------|-----|-----|---------------|---------|
|                                                              | n     | %    | n        | %    |     |     |               |         |
| <b><i>XRCC1</i> G399A polymorphisms§</b>                     |       |      |          |      |     |     |               |         |
| GG                                                           | 62    | 38.8 | 149      | 44.0 | 1.0 | 1.0 |               |         |
| GA                                                           | 94    | 58.8 | 169      | 49.9 | 1.3 | 1.2 | 0.76 to 1.94  | 0.43    |
| AA                                                           | 4     | 2.5  | 21       | 6.2  | 0.5 | 0.4 | 0.10 to 1.62  | 0.20    |
| <b><i>OGG1</i> C326G polymorphisms¶</b>                      |       |      |          |      |     |     |               |         |
| CC                                                           | 34    | 23.4 | 95       | 28.9 | 1.0 | 1.0 |               |         |
| CG                                                           | 109   | 75.2 | 229      | 69.6 | 1.4 | 1.2 | 0.70 to 2.07  | 0.49    |
| GG                                                           | 2     | 1.4  | 5        | 1.5  | 1.2 | 0.7 | 0.10 to 5.11  | 0.75    |
| <b>Cigarette smoking</b>                                     |       |      |          |      |     |     |               |         |
| Non-smoker                                                   | 92    | 42.0 | 230      | 52.5 | 1.0 | 1.0 |               |         |
| Smoker                                                       | 127   | 58.0 | 208      | 47.5 | 2.7 | 1.9 | 0.94 to 4.01  | 0.07    |
| <b>Units of alcohol per month of all alcohol consumption</b> |       |      |          |      |     |     |               |         |
| Non-drinker                                                  | 57    | 26.0 | 254      | 58.0 | 1.0 | 1.0 |               |         |
| <14                                                          | 79    | 36.1 | 92       | 21.0 | 5.2 | 5.2 | 2.74 to 9.95  | <0.001  |
| ≥14                                                          | 83    | 37.9 | 92       | 21.0 | 6.7 | 7.6 | 3.67 to 15.72 | <0.001  |

\*Crude odds ratio from matched case-control analysis.

†Adjusted odds ratio from matched case-control analysis (adjusted for all other variables in the table).

‡95% confidence interval for OR†.

§DNA samples for *XRCC1* genotyping were successfully carried out for 160 out of 175 cases, and 339 out of 350 controls.

¶DNA samples for *OGG1* genotyping were successfully carried out for 145 out of 175 cases, and 329 out of 350 controls.

**Table 4** Gene-environment interactions of *XRCC1* and *OGG1* polymorphisms together with smoking and alcohol drinking on cholangiocarcinoma risk in Khon Kaen, Thailand

| <i>XRCC1</i> | Smoking /<br>Use of alcohol                               | Cases | Controls | OR*  | 95% CI        | P-value      | <i>OGG1</i>  | Smoking /<br>Use of alcohol                               | Cases | Controls | OR*  | 95% CI        | P-value      |
|--------------|-----------------------------------------------------------|-------|----------|------|---------------|--------------|--------------|-----------------------------------------------------------|-------|----------|------|---------------|--------------|
|              |                                                           | n     | n        |      |               |              |              |                                                           | n     | n        |      |               |              |
| <b>G399A</b> | <b>All cigarettes smoking</b>                             |       |          |      |               | <i>0.87†</i> | <b>C326G</b> | <b>All cigarettes smoking</b>                             |       |          |      |               | <i>0.54†</i> |
| GG           | Non-smoker                                                | 22    | 71       | 1.0  |               |              | CC           | Non-smoker                                                | 14    | 55       | 1.0  |               |              |
| GA           | Non-smoker                                                | 48    | 99       | 1.5  | 0.82 to 2.79  | 0.18         | CG           | Non-smoker                                                | 49    | 122      | 1.5  | 0.77 to 2.99  | 0.22         |
| AA           | Non-smoker                                                | 2     | 11       | 0.6  | 0.11 to 2.74  | 0.47         | GG           | Non-smoker                                                | 1     | 1        | —    | —             | —            |
| GG           | Smoker                                                    | 40    | 78       | 2.8  | 1.30 to 5.91  | 0.01         | CC           | Smoker                                                    | 20    | 40       | 3.1  | 1.17 to 8.38  | 0.02         |
| GA           | Smoker                                                    | 46    | 70       | 3.4  | 1.60 to 7.28  | 0.001        | CG           | Smoker                                                    | 60    | 107      | 4.3  | 1.79 to 10.21 | 0.001        |
| AA           | Smoker                                                    | 2     | 10       | 1.2  | 0.21 to 6.29  | 0.86         | GG           | Smoker                                                    | 1     | 4        | 1.5  | 0.14 to 15.44 | 0.74         |
| <b>G399A</b> | <b>Units of alcohol per month of all alcohol drinking</b> |       |          |      |               | <i>0.80†</i> | <b>C326G</b> | <b>Units of alcohol per month of all alcohol drinking</b> |       |          |      |               | <i>0.74†</i> |
| GG           | Non-drinker                                               | 16    | 83       | 1.0  |               |              | CC           | Non-drinker                                               | 10    | 65       | 1.0  |               |              |
| GA           | Non-drinker                                               | 20    | 33       | 4.4  | 1.81 to 10.83 | 0.001        | CG           | Non-drinker                                               | 9     | 9        | 8.1  | 2.30 to 28.36 | 0.001        |
| AA           | Non-drinker                                               | 26    | 33       | 9.2  | 3.65 to 23.21 | <0.001       | GG           | Non-drinker                                               | 15    | 21       | 8.6  | 2.62 to 28.02 | <0.001       |
| GG           | <14                                                       | 22    | 102      | 1.1  | 0.49 to 2.28  | 0.89         | CC           | <14                                                       | 24    | 130      | 1.3  | 0.55 to 3.20  | 0.52         |
| GA           | <14                                                       | 39    | 35       | 8.8  | 3.76 to 20.71 | <0.001       | CG           | <14                                                       | 46    | 58       | 7.0  | 2.85 to 17.39 | <0.001       |
| AA           | <14                                                       | 33    | 32       | 10.3 | 4.14 to 25.80 | <0.001       | GG           | <14                                                       | 39    | 41       | 11.2 | 4.18 to 30.17 | <0.001       |
| GG           | ≥14                                                       | 1     | 12       | 0.4  | 0.05 to 3.71  | 0.44         | CC           | ≥14                                                       | 0     | 1        | —    | —             | —            |
| GA           | ≥14                                                       | 2     | 3        | 2.8  | 0.31 to 25.41 | 0.36         | CG           | ≥14                                                       | 1     | 1        | 7.7  | 0.29 to 26.73 | 0.22         |
| AA           | ≥14                                                       | 1     | 6        | 2.5  | 0.25 to 23.99 | 0.44         | GG           | ≥14                                                       | 1     | 3        | 6.4  | 0.48 to 86.72 | 0.16         |

\*Crude odds ratio from matched case-control analysis.

†P-value for interaction.

## Funding

This research was supported by the Thailand Research Fund (Research grant No. 540102) and the National Research University Project of Thailand, Office of the Higher Education Commission, through the Center of Excellence in Specific Health Problems in Greater Mekong Sub-region (SHeP-GMS), Khon Kaen University (Research grant No. NRU542005).

**Contributors** NS, SP, CP, TE and SW conceived and designed the research. NS and PC performed the research. NS and SP carried out the analyses. All authors contributed to the writing and revisions of the manuscript and approved the final version.

**Competing interests** No conflicts of competing interest.

**Provenance and peer review** Not commissioned; externally peer reviewed.

**Data sharing statement** No additional data are available.

**Ethics approval** Ethical approval was obtained from the Khon Kaen University Ethics Committee for Human Research (Reference No. HE512053).

## Figure Legends

**Figure 1** Polymorphisms in *XRCC1* G399A and *OGGI* C326G were analyzed using PCR with high resolution melting analysis.



## REFERENCES

1. Ferlay J, Shin HR, Bray F, *et al.* GLOBOCAN 2008 v2.0, Cancer Incidence and Mortality Worldwide: IARC CancerBase No.10 (Internet). Lyon, France: IARC; 2010.  
<http://globocan.iarc.fr> (accessed 27 Mar 2013).
2. Khuhaprema T, Attasara P, Sriplung H, *et al.* *Cancer in Thailand Volume VI, 2004-2006*. Bangkok: NCIB, 2012.
3. Parkin DM, Ohshima H, Srivatanakul P, *et al.* Cholangiocarcinoma: epidemiology, mechanisms of carcinogenesis and prevention. *Cancer Epidemiol Biomarkers Prev* 1993;2:537–44.
4. Stern MC, Conti DV, Siegmund KD, *et al.* DNA repair single-nucleotide polymorphisms in colorectal cancer and their role as modifiers of the effect of cigarette smoking and alcohol in the Singapore Chinese Health Study. *Cancer Epidemiol Biomarkers Prev* 2007;16:2363–72.
5. Huang WY, Gao YT, Rashid A, *et al.* Selected base excision repair gene polymorphisms and susceptibility to biliary tract cancer and biliary stones: a population-based case-control study in China. *Carcinogenesis* 2008;29:100–5.
6. Zhang M, Huang WY, Andreotti G, *et al.* Variants of DNA repair genes and the risk of biliary tract cancers and stones: a population-based study in China. *Cancer Epidemiol Biomarkers Prev* 2008;17:2123–7.
7. Srivastava A, Srivastava K, Pandey SN, *et al.* Single-nucleotide polymorphisms of DNA repair genes *OGG1* and *XRCC1*: association with gallbladder cancer in North Indian population. *Ann Surg Oncol* 2009;16:1695–703.

- 1  
2  
3 8. Thanan R, Murata M, Pinlaor S, *et al.* Urinary 8-oxo-7,8-dihydro-2'-deoxyguanosine in  
4 patients with parasite infection and effect of antiparasitic drug in relation to  
5  
6 cholangiocarcinogenesis. *Cancer Epidemiol Biomarkers Prev* 2008;17:518–24.  
7
- 8  
9  
10 9. Dechakhamphu S, Pinlaor S, Sitthithaworn P, *et al.* Lipid peroxidation and etheno DNA  
11  
12 adducts in white blood cells of liver fluke-infected patients: protection by plasma alpha-  
13  
14 tocopherol and praziquantel. *Cancer Epidemiol Biomarkers Prev* 2010;19:310–8.  
15
- 16  
17 10. Zeng L, You G, Tanaka H, *et al.* Combined effects of polymorphisms of DNA-repair protein  
18  
19 genes and metabolic enzyme genes on the risk of cholangiocarcinoma. *Jpn J Clin Oncol*  
20  
21 2013;43: 1190–4.  
22  
23
- 24 11. Songserm N, Promthet S, Sithithaworn P, *et al.* *MTHFR* Polymorphisms and *Opisthorchis*  
25  
26 *viverrini* Infection: a Relationship with Increased Susceptibility to Cholangiocarcinoma in  
27  
28 Thailand. *Asian Pac J Cancer Prev* 2011;12:1341–5.  
29
- 30 12. Songserm N, Promthet S, Sithithaworn P, *et al.* Risk factors for cholangiocarcinoma in high-  
31  
32 risk area of Thailand: Role of lifestyle, diet and methylenetetrahydrofolate reductase  
33  
34 polymorphisms. *Cancer Epidemiol* 2012;36:e89–94.  
35  
36
- 37 13. Kosti O, Byrne C, Meeker KL, *et al.* Mutagen sensitivity, tobacco smoking and breast cancer  
38  
39 risk: a case-control study. *Carcinogenesis* 2010;31:654–9.  
40  
41
- 42 14. Rouissi K, Ouerhani S, Hamrita B, *et al.* Smoking and polymorphisms in xenobiotic  
43  
44 metabolism and DNA repair genes are additive risk factors affecting bladder cancer in  
45  
46 Northern Tunisia. *Pathol Oncol Res* 2011;17:879–86.  
47  
48
- 49 15. Mena S, Ortega A, Estrela JM. Oxidative stress in environmental-induced carcinogenesis.  
50  
51 *Mutat Res* 2009;674:36–44.  
52  
53
- 54 16. Pelucchi C, Tramacere I, Boffetta P, *et al.* Alcohol consumption and cancer risk. *Nutr*  
55  
56 *Cancer* 2011;63:983–90.  
57  
58  
59  
60

- 1  
2  
3 17. Parkin DM, Srivatanakul P, Khlat M, *et al.* Liver cancer in Thailand. I. A case-control study  
4  
5 of cholangiocarcinoma. *Int J Cancer* 1991;48:323–8.  
6  
7
- 8 18. Chernrungrroj G. Risk factors for cholangiocarcinoma: a case-control study (dissertation).  
9  
10 Connecticut: Yale University, 2000.  
11
- 12 19. Honjo S, Srivatanakul P, Sriplung H, *et al.* Genetic and environmental determinants of risk  
13 for cholangiocarcinoma via *Opisthorchis viverrini* in a densely infested area in Nakhon  
14 Phanom, northeast Thailand. *Int J Cancer* 2005;117:854–60.  
15  
16  
17
- 18 20. Poomphakwaen K, Promthet S, Kamsa-Ard S, *et al.* Risk factors for cholangiocarcinoma in  
19 Khon Kaen, Thailand: a nested case-control study. *Asian Pac J Cancer Prev* 2009;10:251–8.  
20  
21  
22
- 23 21. Chalasani N, Baluyut A, Ismail A, *et al.* Cholangiocarcinoma in patients with primary  
24 sclerosing cholangitis: a multicenter case-control study. *Hepatology* 2000;31:7–11.  
25  
26  
27
- 28 22. Sriamporn S, Parkin DM, Pisani P, *et al.* A prospective study of diet, lifestyle, and genetic  
29 factors and the risk of cancer in Khon Kaen Province, northeast Thailand: description of the  
30 cohort. *Asian Pac J Cancer Prev* 2005;6:295–303.  
31  
32  
33
- 34 23. Kietthubthew S, Sriplung H, Au WW, *et al.* Polymorphism in DNA repair genes and oral  
35 squamous cell carcinoma in Thailand. *Int J Hyg Environ Health* 2006;209:21–9.  
36  
37  
38
- 39 24. Sangrajrang S, Schmezer P, Burkholder I, *et al.* Polymorphisms in three base excision repair  
40 genes and breast cancer risk in Thai women. *Breast Cancer Res Treat* 2008;111:279–88.  
41  
42  
43
- 44 25. Settheetham-Ishida W, Yuenyao P, Natphopsuk S, *et al.* Genetic Risk of DNA Repair Gene  
45 Polymorphisms (*XRCC1* and *XRCC3*) for High Risk Human Papillomavirus Negative  
46 Cervical Cancer in Northeast Thailand. *Asian Pac J Cancer Prev* 2011;12:963–6.  
47  
48  
49
- 50 26. Klinchid J, Chewaskulyoung B, Saeteng S, *et al.* Effect of combined genetic polymorphisms  
51 on lung cancer risk in northern Thai women. *Cancer Genet Cytogenet* 2009;195:143–9.  
52  
53  
54  
55  
56  
57  
58  
59  
60

- 1  
2  
3 27. Mohrenweiser HW, Wilson DM 3rd, Jones IM. Challenges and complexities in estimating  
4 both the functional impact and the disease risk associated with the extensive genetic variation  
5 in human DNA repair genes. *Mutat Res* 2003;526:93–125.  
6  
7  
8  
9  
10 28. Lunn RM, Langlois RG, Hsieh LL, *et al.* *XRCC1* polymorphisms: effects on aflatoxin B1-  
11 DNA adducts and glycophorin A variant frequency. *Cancer Res* 1999;59:2557–61.  
12  
13 29. Duell EJ, Millikan RC, Pittman GS, *et al.* Polymorphisms in the DNA repair gene *XRCC1*  
14 and breast cancer. *Cancer Epidemiol Biomarkers Prev* 2001;10:217–22.  
15  
16  
17  
18  
19 30. Matullo G, Guarrera S, Carturan S, *et al.* DNA repair gene polymorphisms, bulky DNA  
20 adducts in white blood cells and bladder cancer in a case-control study. *Int J Cancer*  
21  
22 2001;92:562–7.  
23  
24  
25  
26  
27 31. Vodicka P, Stetina R, Polakova V, *et al.* Association of DNA repair polymorphisms with  
28 DNA repair functional outcomes in healthy human subjects. *Carcinogenesis* 2007;28:657–  
29  
30  
31  
32  
33  
34  
35  
36  
37  
38  
39  
40  
41  
42  
43  
44  
45  
46  
47  
48  
49  
50  
51  
52  
53  
54  
55  
56  
57  
58  
59  
60

1  
2  
3  
4  
5  
6  
7  
8  
9  
10  
11  
12  
13  
14  
15  
16  
17  
18  
19  
20  
21  
22  
23  
24  
25  
26  
27  
28  
29  
30  
31  
32  
33  
34  
35  
36  
37  
38  
39  
40  
41  
42  
43  
44  
45  
46  
47  
48  
49  
50  
51  
52  
53  
54  
55  
56  
57  
58  
59  
60

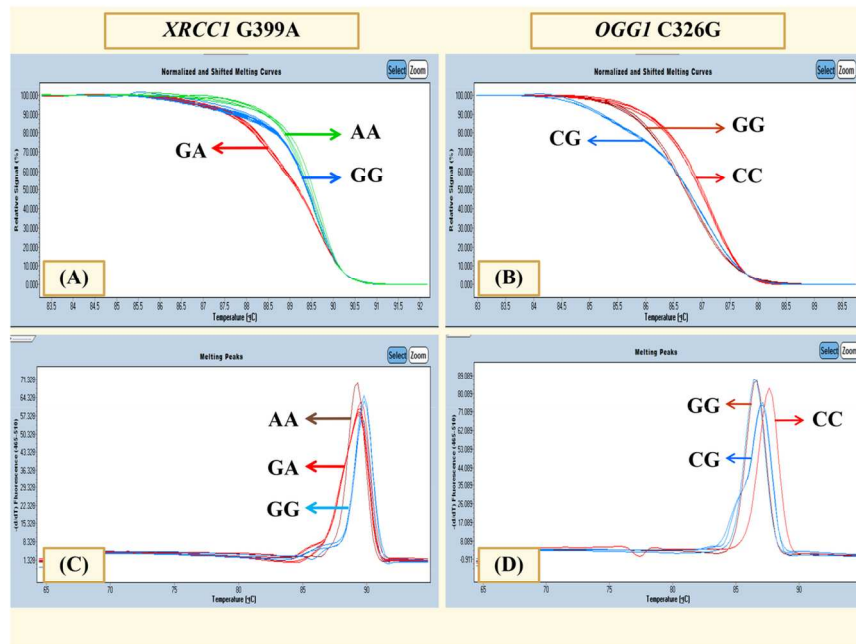

Figure 1 Polymorphisms in XRCC1 G399A and OGG1 C326G were analyzed using PCR with high resolution melting analysis.  
122x86mm (300 x 300 DPI)

Review only

# BMJ Open

## Gene-environment interaction involved in cholangiocarcinoma in Thai population: polymorphisms of DNA repair genes, smoking and use of alcohol

|                                 |                                                                                                                                                                                                                                                                                                                                                                                                                                                                                                                                                                                                           |
|---------------------------------|-----------------------------------------------------------------------------------------------------------------------------------------------------------------------------------------------------------------------------------------------------------------------------------------------------------------------------------------------------------------------------------------------------------------------------------------------------------------------------------------------------------------------------------------------------------------------------------------------------------|
| Journal:                        | <i>BMJ Open</i>                                                                                                                                                                                                                                                                                                                                                                                                                                                                                                                                                                                           |
| Manuscript ID:                  | bmjopen-2014-005447.R2                                                                                                                                                                                                                                                                                                                                                                                                                                                                                                                                                                                    |
| Article Type:                   | Research                                                                                                                                                                                                                                                                                                                                                                                                                                                                                                                                                                                                  |
| Date Submitted by the Author:   | 22-Sep-2014                                                                                                                                                                                                                                                                                                                                                                                                                                                                                                                                                                                               |
| Complete List of Authors:       | Promthet, Supanee; Khon Kaen University, Department of Epidemiology, Faculty of Public Health<br>Songserm, Nopparat; Ubon Ratchathani Rajabhat University, Department of Community Health, Faculty of Public Health<br>Pientong, Chamsai; Khon Kaen University, Department of Microbiology, Faculty of Medicine<br>Ekalaksananan, Tipaya; Khon Kaen University, Department of Microbiology, Faculty of Medicine<br>Chopjitt, Peechanika; Khon Kaen University, Department of Microbiology, Faculty of Medicine<br>Wiangnon, Surapon; Khon Kaen University, Department of Paediatrics, Faculty of Medicine |
| <b>Primary Subject Heading</b>: | Epidemiology                                                                                                                                                                                                                                                                                                                                                                                                                                                                                                                                                                                              |
| Secondary Subject Heading:      | Epidemiology, Public health                                                                                                                                                                                                                                                                                                                                                                                                                                                                                                                                                                               |
| Keywords:                       | EPIDEMIOLOGY, Epidemiology < ONCOLOGY, PUBLIC HEALTH                                                                                                                                                                                                                                                                                                                                                                                                                                                                                                                                                      |
|                                 |                                                                                                                                                                                                                                                                                                                                                                                                                                                                                                                                                                                                           |

SCHOLARONE™  
Manuscripts

1  
2  
3 **Gene-environment interaction involved in cholangiocarcinoma in Thai population:**  
4  
5 **polymorphisms of DNA repair genes, smoking and use of alcohol**  
6  
7  
8  
9

10 **Corresponding author**

11  
12 Professor Supanee Promthet, Department of Epidemiology, Faculty of Public Health, Khon  
13  
14 Kaen University, Khon Kaen, 40002, Thailand

15  
16 Phone: +66(0) 43-347057; Fax +66(0) 43-347058; E-mail: supanee@kku.ac.th  
17  
18  
19  
20  
21  
22

23 **Author names**

24  
25 Nopparat Songserm,<sup>1</sup> Supanee Promthet,<sup>2</sup> Chamsai Pientong,<sup>3</sup> Tipaya Ekalaksananan,<sup>3</sup>  
26  
27 Peechanika Chopjitt,<sup>3</sup> Surapon Wiangnon,<sup>4,5</sup>  
28  
29  
30  
31  
32

33 **Author affiliations**

34  
35 <sup>1</sup>Department of Community Health, Faculty of Public Health, Ubon Ratchathani Rajabhat  
36  
37 University, Thailand

38  
39 <sup>2</sup>Department of Epidemiology, Faculty of Public Health, Khon Kaen University, Thailand

40  
41 <sup>3</sup>Department of Microbiology, Faculty of Medicine, Khon Kaen University, Thailand

42  
43 <sup>4</sup>Department of Paediatrics, Faculty of Medicine, Khon Kaen University, Thailand

44  
45 <sup>5</sup>Cancer Unit, Faculty of Medicine, Khon Kaen University, Thailand  
46  
47  
48  
49  
50

51 **Keywords:** Cholangiocarcinoma, Polymorphisms, DNA repair genes, Smoking, Alcohol  
52  
53 drinking  
54

55  
56 **Word count:** 2759 words  
57  
58  
59  
60

## ABSTRACT

**Objective:** Cholangiocarcinoma (CCA) is the most common malignancy in a Northeast Thai population. Smoking and alcohol drinking are associated with production of free radical intermediates, which can cause several types of DNA lesions. Reduced repair of these DNA lesions would constitute an important risk factor for cancer development. We therefore examined that whether polymorphisms in DNA base-excision repair (BER) genes, *XRCC1* G399A and *OGG1* C326G, were associated with CCA risk and whether they modified the effect of smoking and alcohol drinking in Thai population.

**Design:** A nested case-control study within cohort study was conducted: 219 subjects with primary CCA were each matched with two non-cancer controls from the same cohort on sex, age at recruitment and presence/absence of *Opisthorchis viverrini* eggs in stools. Smoking and alcohol consumption were assessed on recruitment. Polymorphisms in BER genes were analyzed using a polymerase chain reaction with high resolution melting analysis. The associations were assessed using conditional logistic regression.

**Results:** Our results suggest that in Thai population polymorphisms in *XRCC1* and *OGG1* genes, particularly in combination, are associated with increased susceptibility to CCA, and that their role as modifiers of the effect of smoking and alcohol consumption influences the risk of CCA.

**Conclusions:** Better ways of reducing habitual smoking and alcohol consumption, targeted toward subgroups which are genetically susceptible, are recommended. CCA is multi-factorial disease, and a comprehensive approach is needed for its effective prevention. This approach would also have the additional advantage of reducing the onset of other cancers.



### Strengths and limitations of this study

- This was a nested case-control study within the cohort study. This design has the advantage of minimising a systematic recall bias which can occur when the receipt of diagnosis of cancer leads to subjects modifying their self-reported personal histories, in this case, their recall of cigarette smoking and alcohol consumption. This was prevented in the present study because subjects were interviewed at the time of recruitment, before case or control status was defined.
- The diagnosis of cholangiocarcinoma was not histologically confirmed in all the cases.
- This study did not include the population aged 70 years and above.
- In future research, larger samples are needed to increase the power of the studies.

## INTRODUCTION

The data from GLOBOCAN 2008 shows that liver cancer is the fourth most common cause of death from cancer worldwide.<sup>1</sup> It is the most common cancer in Northeast Thailand, where the great majority of cases are cholangiocarcinomas (CCA).<sup>2</sup> Data from the Khon Kaen Cancer Registry (KKCR) have shown that the estimated age-standardised incidence rates for men and women are 84.6 and 36.8 per 100 000, respectively.<sup>3</sup>

Among several types of DNA damage induced by carcinogens from tobacco and alcohol are oxidative base damage and single-strand breaks, which are repaired by the base-excision repair pathway (BER).<sup>4</sup> Genetic variants and polymorphisms in DNA repair pathways have been reported to affect the levels of DNA lesions, which accumulate in the epithelial tissue of the hepatobiliary tract system, thus influencing the susceptibility to biliary tract cancers and stones in a Chinese population<sup>5, 6</sup> and gallbladder cancer in an Indian population.<sup>7</sup> There were very few studies on this topic in relation to CCA in Thai population, but there have been studies, which clarify the role of the accumulation of levels of oxidative DNA lesions in liver fluke-infected- and CCA patients<sup>8-10</sup>; these studies concluded that some biomarkers from oxidative DNA lesions induced by liver fluke infection – a major risk factor – may play an important role in CCA development. However, the results from our previous study showed that not only liver fluke infection but also certain lifestyle and dietary co-factors were associated with increased risk of CCA.<sup>11, 12</sup> Long-term smoking<sup>13, 14</sup> and alcohol drinking<sup>4, 15, 16</sup> are associated with production of free radical intermediates, which can cause several kinds of DNA lesions. Reduced repair of these DNA lesions would constitute an important risk factor for cancer development. With respect to genetic factors, a number of polymorphisms in various DNA repair genes have been discovered, and it is possible that these polymorphisms may affect DNA repair capacity and thus modulate susceptibility to cancer. Investigations are therefore needed into the different patterns of

1  
2  
3 smoking and alcohol drinking in relation to susceptibility to CCA, along with DNA repair  
4  
5 capacity induced by genetic variations or polymorphisms.  
6  
7

8 Although cigarette smoking was not associated with CCA development in the previous  
9  
10 studies conducted in Thailand<sup>12, 17-20</sup> and elsewhere,<sup>21</sup> a modifying effect by DNA repair genes  
11  
12 remains a possibility. With respect to the use of alcohol, this was related to a substantially  
13  
14 increased risk of CCA in our previous study.<sup>12</sup> At the molecular level, it is known that single-  
15  
16 nucleotide polymorphisms (SNPs) in genes participate biochemically in the base-excision repair  
17  
18 pathway (X-ray repair cross-complementing group 1: *XRCC1* and 8-oxoguanine DNA  
19  
20 glycosylase 1: *OGG1*), which repairs smoking- and alcohol-induced oxidative DNA base  
21  
22 modifications.<sup>4</sup>  
23  
24  
25  
26

27 In this present study, we therefore investigated whether polymorphisms in DNA base-  
28  
29 excision repair genes (*XRCC1* G399A and *OGG1* C326G) are associated with CCA risk and  
30  
31 whether their effects are modified by cigarette smoking and alcohol drinking in a Northeastern  
32  
33 Thai population residing in a high-incidence area of opisthorchiasis-related CCA. The selection  
34  
35 of these SNPs in DNA base-excision repair genes was based on their putative effect on protein  
36  
37 function and/or previous evidence of associations with the risk of hepatobiliary tract cancers in  
38  
39 Asian, Chinese and Indian populations<sup>5-7</sup> and the combined effects of a DNA-repair gene and  
40  
41 metabolic gene polymorphisms on CCA risk in Thailand.<sup>10</sup> However, these studies involved only  
42  
43 gene-gene interactions. There is need for studies of gene-environment interactions, especially  
44  
45 between DNA-repair genes and exposure to the carcinogenic effects of tobacco/alcohol  
46  
47 carcinogens in relation to CCA risk.  
48  
49  
50  
51  
52  
53  
54  
55  
56  
57  
58  
59  
60

## MATERIALS AND METHODS

### Study subjects

This was a case-control study nested within the 23 584 subjects of the Khon Kaen Cohort Study (KKCS). Details of the KKCS and the selection of CCA cases and controls used in the present study have been previously reported.<sup>11, 12, 22</sup> Briefly, 219 (0.9%) cohort members who had developed a primary CCA, diagnosis at least by ultrasound, with or without contrast radiology, tumour markers (such as CA19-9) or histopathology, six or more months after enrollment were identified. The vital status and date of death of potential cases were ascertained by linkage to the files of deaths in Thailand, which are held in the database of the National Health Security Office and the demographic database of Ministry of Interior. All cases had died within two years of diagnosis. Two non-cancer controls from the same cohort population were randomly selected for matching with each case on sex, age at recruitment ( $\pm 3$  years) and presence/absence of liver fluke eggs in the faeces at recruitment (detected by the formalin ethyl acetate concentration technique). This research was approved by the Khon Kaen University Ethics Committee for Human Research (Reference No. HE512053).

### Assessment of cigarette smoking and alcohol drinking

Definitions of alcohol use, cigarette smoking and levels of consumption of alcohol were the same as those previously described.<sup>12</sup> A smoker was defined as someone who had ever smoked any type of cigarette on a daily basis. However, in the present study smokers were categorized into four groups according to age when they began smoking. The 1<sup>st</sup>, 2<sup>nd</sup> and 3<sup>rd</sup> quartiles obtained from the control group frequency distribution for age of starting to smoke were used as the cut-offs for the four groups.

1  
2  
3 Ever drinkers were defined as those who consumed at least one type of alcoholic beverage  
4 (beer, *Sato*, white whisky, red whisky and other whiskies) at least once a month; those drinking  
5 less than this were defined as non-drinkers. The consumption of each subject was calculated in  
6 terms of units of alcohol, where a unit corresponds to 10 ml (approximately 8 gm) of ethanol.  
7  
8 The number of units of alcohol in a drink was determined by multiplying volume of the drink (in  
9 milliliters) by its alcohol percentage (beer 5.0%, *Sato* 7.0%, white whisky 40%, red whisky 35%)  
10 and dividing by 1000. Drinkers were dichotomized according to units of alcohol consumed per  
11 month on the basis of the median monthly consumption for the controls.  
12  
13  
14  
15  
16  
17  
18  
19  
20  
21  
22  
23

## 24 **Laboratory methods**

### 25 *Specimen collection and DNA extraction*

26  
27 Blood samples (buffy coat) were available for 175 (80%) of the 219 eligible CCA cases;  
28 specimens were retrieved from the KKCS bio-bank for these cases and for the 350 matched  
29 controls. Genomic DNA was extracted from buffy coat fractions using the standard protocols of  
30 Genomic DNA Mini Kit with Proteinase K (Geneaid Biotech). Of those with DNA samples,  
31 genotyping was successfully carried out for 95% (499 out of 525) of all samples for *XRCC1* and  
32 for 90% (474 out of 525) of all samples for *OGGI*. Laboratory personnel were blinded to the  
33 case-control status of the available samples.  
34  
35  
36  
37  
38  
39  
40  
41  
42  
43  
44  
45  
46  
47

### 48 *PCR amplification and genetic polymorphisms detection*

49  
50 The real-time polymerase chain reactions with high resolution melting analysis (Real-time  
51 PCR-HRM) technique of DNA amplification for the DNA base-excision repair genes (*XRCC1*  
52 and *OGGI*) polymorphisms were performed in a 96-well plate in the LightCycler<sup>®</sup> 480 Real-  
53 Time PCR System.  
54  
55  
56  
57  
58  
59  
60

1  
2  
3 The amplification of *XRCC1* G399A used two primers, [F]:5'-AGT GGG TGC TGG  
4 ACT GTC-3' and [R]:5'-TTG CCC AGC ACA GGA TAA-3', and was performed in a  
5 LightCycler® 480 Real-Time PCR System with a final volume of 20 µl containing 10 µl of  
6 master mix, 4.4 µl of H<sub>2</sub>O, 3 mM of MgCl<sub>2</sub>, 0.3 µM of each primer and 200 ng of the DNA  
7 template. The amplification of the *OGGI* C326G was performed in the same way, but the  
8 primers were [F]:5'-CCT ACA GGT GCT GTT CAG T-3' and [R]:5'-CCT TTG GAA CCC TTT  
9 CTG-3'.  
10  
11  
12  
13  
14  
15  
16  
17  
18

19 HRM data were analyzed using the LightCycler 480® Gene Scanning Software version  
20 1.5 (Roche). Normalized and temperature-shifted melting curves carrying a sequence variation  
21 were evaluated and compared with the wild-type sample. Sequence variations were distinguished  
22 by different shape of melting curves (Figure 1(A) for *XRCC1* G399A and (B) for *OGGI* C326G).  
23 Melting peaks of sequence variation were analyzed and compared with the wild-type sample.  
24 Different plots were distinguished by different melting peaks for each genotype (Figure 1(C) for  
25 *XRCC1* G399A and (D) for *OGGI* C326G). To improve the genotyping quality and validation,  
26 genotyping of 10% of random samples was confirmed by the PCR with restriction fragment  
27 length polymorphism techniques (PCR-RFLP).  
28  
29  
30  
31  
32  
33  
34  
35  
36  
37  
38  
39  
40  
41  
42

### 43 **Statistical analysis**

44 To assess the strength of the associations between polymorphisms in DNA base-excision repair  
45 genes (*XRCC1* and *OGGI*) and the risk of CCA, odds ratio (ORs) with 95% confidence intervals  
46 (CIs) were estimated using conditional logistic regression. A univariate analysis using  
47 McNemar's chi-square test and conditional logistic regression was carried out to explore the  
48 associations between DNA-repair genes polymorphisms, smoking and alcohol drinking, and the  
49 risk of CCA. Factors found to have a strong association with CCA in the univariate analysis (p  
50  
51  
52  
53  
54  
55  
56  
57  
58  
59  
60

1  
2  
3 <0.05), and factors without association in the univariate analysis, but found to play important  
4 roles as factors for CCA risk from literature reviews, were included in the multivariate analysis.  
5  
6 Possible modifications of the effects of smoking and alcohol drinking by polymorphisms in  
7  
8 *XRCCI* G399A and *OGGI* C326G were also analyzed. A *P*-value <0.05 was considered  
9  
10 statistically significant. All statistical analyses were performed with a statistical package, STATA  
11  
12 version 10 (Stata, College Station, TX).  
13  
14  
15  
16  
17  
18  
19

## 20 RESULTS

21  
22 There were 219 cohort members who had developed a primary CCA six or more months after  
23 enrollment into the KKCS. They comprised 92 females and 127 males, with a median age of 57  
24 years (minimum 31, maximum 69). There were two controls matched by age and sex for each  
25 case. Table 1 shows the distribution of *XRCCI* G399A and *OGGI* C326G polymorphisms in  
26 cases and controls, the joint distribution of those polymorphisms, and the associated odds ratios.  
27  
28 While there were no associations between any of these individual polymorphisms and the risk of  
29 CCA, the combinations of *XRCCI* GA heterozygous and *OGGI* CC wild-type or CG  
30 heterozygous, and of *XRCCI* GG wild-type and *OGGI* CG heterozygous, were significantly  
31 related to a reduced risk of CCA (*P*-value <0.001). Conversely, the combinations of the *OGGI*  
32 GG mutant, homozygous with all three genotypes of *XRCCI* (wild-type, heterozygous and  
33 mutant homozygous), were significantly associated with an increased risk of CCA (*P*-value =  
34 0.01, 0.03 and 0.004, respectively), but there were no interactions between the polymorphisms of  
35  
36  
37  
38  
39  
40  
41  
42  
43  
44  
45  
46  
47  
48  
49  
50  
51  
52  
53  
54  
55  
56  
57  
58  
59  
60

In the univariate analysis (Table 2), there were significant associations between cigarette smoking and alcohol consumption and the risk of CCA, and their joint effect appeared to be

1  
2  
3 multiplicative with no interactions between them. There was trend in risk with smoking  
4  
5 frequency or number of years of habitual smoking ( $P$ -value for trend = 0.002).  
6  
7

8 In the multivariate analysis (Table 3), shows the adjusted ORs and 95% CIs from the  
9  
10 multivariate analysis. There was a clear association with alcohol drinking: compared with non-  
11  
12 drinkers, individuals who consumed <14 units of alcohol per month had an increased risk of CCA  
13  
14 (OR=5.2, 95% CI 2.74 to 9.95), and the risk was higher still in those who consumed  $\geq$ 14 units of  
15  
16 alcohol per month (OR=7.6, 95% CI 3.67 to 15.72).  
17  
18  
19

20 Table 4 shows the results of gene-environment interaction of the *XRCC1* and *OGG1*  
21  
22 polymorphisms along with smoking and alcohol drinking on the risk of CCA. When compared  
23  
24 with the reference subjects (nonsmokers with the *XRCC1* GG wild-type), smokers carrying the  
25  
26 *XRCC1* GG wild-type had an increased susceptibility to CCA (OR=2.8, 95% CI 1.30 to 5.91),  
27  
28 and this was higher still in smokers with GA heterozygous (OR=3.4, 95% CI 1.60 to 7.28).  
29  
30 Moreover, smokers with the *OGG1* CC wild-type and CG heterozygous had an increased risk of  
31  
32 CCA compared with nonsmokers with the wild-type. With respect to alcohol consumption, some  
33  
34 combinations of alcohol drinking and mutant polymorphisms of both *XRCC1* and *OGG1* were  
35  
36 statistically significant. For example, compared with the reference group (nondrinkers with the  
37  
38 *XRCC1* GG wild-type), subjects with the *XRCC1* GA heterozygous who were nondrinkers or  
39  
40 drinkers (<14 units of alcohol per month) had an increased susceptibility to CCA (4.4-fold  
41  
42 increased to 8.8-fold). Similarly, subjects with the *XRCC1* AA variant genotype had an increased  
43  
44 risk of CCA (9.2-fold in nondrinkers increased to 10.3-fold in drinkers of <14 units of alcohol per  
45  
46 month). Again, there were no interactions between *XRCC1* or *OGG1* polymorphisms and  
47  
48 smoking or alcohol drinking.  
49  
50  
51  
52  
53  
54  
55  
56  
57  
58  
59  
60



## DISCUSSION

This was a case-control study nested within the 23 584 Khon Kaen Cohort Study (KKCS).<sup>11, 12, 22</sup>

The design of this study minimises recall bias of cigarette smoking and alcohol drinking, as subjects were interviewed at the time of recruitment, before case or control status was defined.

This design is very useful for examining the role of self-reported factors such as cigarette smoking and alcohol consumption, which are modified when cancer is present.

Smoking was not associated with CCA development in this present study (after adjustment for all other variables in the multivariate analysis) – polymorphisms in *XRCC1* and *OGG1*, cigarette smoking and units of alcohol per month of all alcohol consumption.

Alcohol consumption was significantly associated with an increased risk of CCA in previous studies in Thailand<sup>18, 19</sup> and elsewhere.<sup>21</sup> Alcohol may affect metabolic pathways of endogenous and exogenous nitrosamines<sup>16, 19</sup> and it is associated with production of free radical intermediate, which can cause several kinds of DNA lesions.<sup>4, 15, 16</sup> Reduced repair of these DNA lesions would therefore constitute a major risk factor for cancer development.<sup>15, 16</sup>

The genotype frequencies of *XRCC1* and *OGG1* polymorphisms found in the controls for the present study were consistent with those found in other studies in Thailand: the prevalence of G allele of *XRCC1* codon 399 was 68.88% in the present study compared with 36.59%–73.20% in other studies<sup>10, 23-25</sup> and A allele of *XRCC1* codon 399 was 31.12% in controls (prevalence of A allele was 26.80%–52.56%). In our analysis of the *OGG1* codon 326, the genotype distribution in the controls deviated from the Hardy–Weinberg equilibrium. Genotype frequency of *OGG1* C326G in controls was slightly higher than rates noted in reports from other studies in Thailand.<sup>10, 24, 26</sup> The C allele of *OGG1* codon 326 was 63.68% in controls (C allele prevalence was between 50.12%–55.00%) and G allele of *OGG1* codon 326 was 36.32% in controls (prevalence of G allele in *OGG1* codon 326 was between 45.00%–49.88%).

1  
2  
3  
4  
5  
6  
7  
8  
9  
10  
11  
12  
13  
14  
15  
16  
17  
18  
19  
20  
21  
22  
23  
24  
25  
26  
27  
28  
29  
30  
31  
32  
33  
34  
35  
36  
37  
38  
39  
40  
41  
42  
43  
44  
45  
46  
47  
48  
49  
50  
51  
52  
53  
54  
55  
56  
57  
58  
59  
60

*XRCCI* and *OGGI* are major DNA repair genes involved in BER. Mutations and polymorphisms in DNA repair genes, which affect the efficiency of DNA damage repair, may increase an individual's susceptibility to several cancers<sup>23-26</sup> including cancers of the hepatobiliary tract.<sup>5-7</sup> However, no studies on this topic have been conducted in relation to CCA susceptibility and especially not in Thailand where the incidence of CCA is highest in the world.<sup>17</sup> However, there are four studies in a Thai population, which investigated relationships between the BER gene polymorphisms and other common cancers. Whereas *XRCCI* G399A polymorphisms tend to be associated with a reduced risk of oral squamous cell carcinoma,<sup>23</sup> they are associated with increased risks of breast<sup>24</sup> and cervical cancers,<sup>25</sup> and *OGGI* C326G polymorphisms tend to be related to increased risks of breast<sup>24</sup> and lung cancers.<sup>26</sup>

Several studies have explored the associations between polymorphisms of the DNA repair genes involved in BER (*XRCCI* G399A and *OGGI* C326G) and the risk of various cancers, but they have shown inconsistent results. This may be the consequence of the different modifying effects, which these polymorphisms have on the balance during the DNA repair process. Imbalance in the tightly regulated process can be caused by SNPs and will result in deficient DNA repair and an increase in DNA breaks.<sup>27</sup> The *XRCCI* codon 399 A allele and the *OGGI* 326 G allele have been associated with a reduced capacity of the DNA repair process as detected by the persistence of DNA bulky adducts<sup>28-30</sup> and  $\gamma$ -irradiation induced oxidative DNA damage.<sup>31</sup> In addition, the balance may be modified by smoking- and alcohol-induced oxidative DNA base modifications interacting with the repair inefficiency of BER polymorphisms<sup>4</sup>; for example, the *XRCCI* GA variant heterozygous carriers, who were nondrinkers or drinkers of <14 units of alcohol per month, had an increased susceptibility to CCA (4.4-fold in nondrinkers increase to

1  
2  
3 8.8-fold in drinkers) when compared with nondrinkers carrying the *XRCC1* GG wild-type (Table  
4  
5  
6 4).

7  
8 In conclusion, this study is the first report of possible associations between the main  
9  
10 polymorphisms in BER genes (*XRCC1* G399A, *OGGI* C326G), the joint effects of both genes,  
11  
12 and their modification of the effects of cigarette smoking and alcohol drinking on CCA risk in a  
13  
14 Thai population. Our results suggest that polymorphisms in *XRCC1* and *OGGI* genes,  
15  
16 particularly in combination, were associated with increased susceptibility to CCA. CCA is a  
17  
18 multifaceted disease requiring a broad range of preventative actions. In the context of the present  
19  
20 study, there is a need for more effective programmes for smoking cessation and reducing alcohol  
21  
22 consumption, targeted especially at subgroups which are genetically at particular risk for CCA.  
23  
24  
25  
26  
27 Such an approach could also help in the prevention of other forms of cancer.  
28  
29  
30  
31  
32  
33  
34  
35  
36  
37  
38  
39  
40  
41  
42  
43  
44  
45  
46  
47  
48  
49  
50  
51  
52  
53  
54  
55  
56  
57  
58  
59  
60

**Table 1** Univariate analysis of *XRCC1* and *OGG1* polymorphisms with the risk of cholangiocarcinoma in Khon Kaen, Thailand

| Genetic polymorphisms                          | Cases |      | Controls |      | OR*  | 95% CI       | P-value       |        |
|------------------------------------------------|-------|------|----------|------|------|--------------|---------------|--------|
|                                                | n     | %    | n        | %    |      |              |               |        |
| <b><i>XRCC1</i> G399A<sup>†</sup></b>          |       |      |          |      |      |              |               |        |
| GG                                             | 62    | 38.8 | 149      | 44.0 | 1.0  |              |               |        |
| GA                                             | 94    | 58.8 | 169      | 49.9 | 1.3  | 0.89 to 1.97 | 0.17          |        |
| AA                                             | 4     | 2.5  | 21       | 6.2  | 0.5  | 0.16 to 1.42 | 0.18          |        |
| GA or AA (any A allele)                        | 98    | 61.3 | 190      | 56.1 | 1.2  | 0.82 to 1.78 | 0.33          |        |
| <b><i>OGG1</i> C326G<sup>‡</sup></b>           |       |      |          |      |      |              |               |        |
| CC                                             | 34    | 23.5 | 95       | 28.9 | 1.0  |              |               |        |
| CG                                             | 109   | 75.2 | 229      | 69.6 | 1.4  | 0.86 to 2.23 | 0.18          |        |
| GG                                             | 2     | 1.4  | 5        | 1.5  | 1.2  | 0.22 to 7.03 | 0.80          |        |
| CG or GG (any G allele)                        | 111   | 76.6 | 234      | 71.1 | 1.4  | 0.86 to 2.22 | 0.18          |        |
| <b><u>Joint effects</u></b>                    |       |      |          |      |      |              |               |        |
| <b><i>XRCC1</i> G399A    <i>OGG1</i> C326G</b> |       |      |          |      |      |              |               |        |
| GG                                             | CC    | 14   | 9.7      | 41   | 12.7 | 1.0          |               |        |
| GA                                             | CC    | 19   | 13.1     | 47   | 14.5 | 0.3          | 0.15 to 0.55  | <0.001 |
| AA                                             | CC    | 2    | 1.4      | 4    | 1.2  | 3.5          | 1.10 to 14.60 | 0.03   |
| GG                                             | CG    | 42   | 29.0     | 100  | 30.9 | 0.1          | 0.07 to 0.25  | <0.001 |
| GA                                             | CG    | 56   | 38.6     | 108  | 33.3 | 0.1          | 0.07 to 0.22  | <0.001 |
| AA                                             | CG    | 3    | 2.1      | 15   | 4.6  | 0.9          | 0.42 to 2.07  | 1.00   |
| GG                                             | GG    | 5    | 3.4      | 3    | 0.9  | 4.7          | 1.30 to 25.33 | 0.01   |
| GA                                             | GG    | 2    | 1.4      | 4    | 1.2  | 3.5          | 1.10 to 14.60 | 0.03   |
| AA                                             | GG    | 2    | 1.4      | 2    | 0.6  | 7.0          | 1.61 to 63.46 | 0.004  |
| <i>P-value for interaction = 0.21</i>          |       |      |          |      |      |              |               |        |

\*Crude odds ratio from matched case-control analysis.

<sup>†</sup>DNA samples for *XRCC1* genotyping were successfully carried out for 160 out of 175 cases, and 339 out of 350 controls.

<sup>‡</sup>DNA samples for *OGG1* genotyping were successfully carried out for 145 out of 175 cases, and 329 out of 350 controls.

**Table 2** Univariate analysis of cigarette smoking and alcohol drinking on the risk of cholangiocarcinoma in Khon Kaen, Thailand

| Variables                                                     | Cases |      | Controls |      | OR*  | 95% CI        | P-value |
|---------------------------------------------------------------|-------|------|----------|------|------|---------------|---------|
|                                                               | n     | %    | n        | %    |      |               |         |
| <b>Cigarette smoking</b>                                      |       |      |          |      |      |               |         |
| Non-smoker                                                    | 92    | 42.0 | 230      | 52.5 | 1.0  |               |         |
| Smoker                                                        | 127   | 58.0 | 208      | 47.5 | 2.7  | 1.57 to 4.50  | <0.001  |
| <b>Age at which smoking started of all cigarettes (years)</b> |       |      |          |      |      |               |         |
| Non-smoker                                                    | 92    | 42.0 | 230      | 52.5 | 1.0  |               |         |
| <17                                                           | 28    | 12.8 | 48       | 11.0 | 2.9  | 1.38 to 5.91  | 0.01    |
| 17–19                                                         | 35    | 16.0 | 44       | 10.1 | 3.6  | 1.85 to 7.17  | <0.001  |
| 20–21                                                         | 40    | 18.3 | 70       | 16.0 | 2.5  | 1.33 to 4.62  | 0.004   |
| 22+                                                           | 24    | 11.0 | 46       | 10.5 | 2.4  | 1.19 to 4.73  | 0.01    |
| <i>P-value for trend = 0.002</i>                              |       |      |          |      |      |               |         |
| <b>Alcohol consumption</b>                                    |       |      |          |      |      |               |         |
| No                                                            | 57    | 26.0 | 254      | 58.0 | 1.0  |               |         |
| Yes                                                           | 162   | 74.0 | 184      | 42.0 | 5.7  | 3.61 to 9.04  | <0.001  |
| <b>Units of alcohol per month of all alcohol consumption</b>  |       |      |          |      |      |               |         |
| Non-drinker                                                   | 57    | 26.0 | 254      | 58.0 | 1.0  |               |         |
| <14                                                           | 79    | 36.1 | 92       | 21.0 | 5.2  | 3.15 to 8.43  | <0.001  |
| ≥14                                                           | 83    | 37.9 | 92       | 21.0 | 6.7  | 3.90 to 11.38 | <0.001  |
| <b>Alcohol consumption and smoking</b>                        |       |      |          |      |      |               |         |
| No alcohol, non-smoker                                        | 42    | 19.2 | 178      | 40.6 | 1.0  |               |         |
| No alcohol, smoker                                            | 15    | 6.9  | 76       | 17.4 | 2.2  | 0.93 to 5.00  | 0.07    |
| Alcohol drinker, non-smoker                                   | 50    | 22.8 | 52       | 11.9 | 5.8  | 3.12 to 10.78 | <0.001  |
| Alcohol drinker, smoker                                       | 112   | 51.1 | 132      | 30.1 | 10.4 | 5.07 to 21.16 | <0.001  |
| <i>P-value for trend &lt;0.001</i>                            |       |      |          |      |      |               |         |
| <i>P-value for interaction = 0.68</i>                         |       |      |          |      |      |               |         |

\*Crude odds ratio from matched case-control analysis.

**Table 3** Cases and controls, and odds ratios for cholangiocarcinoma associated with smoking, alcohol drinking, and *XRCC1* and *OGG1* polymorphisms

| Variables                                                    | Cases |      | Controls |      | OR* | OR† | 95% CI‡       | P-value |
|--------------------------------------------------------------|-------|------|----------|------|-----|-----|---------------|---------|
|                                                              | n     | %    | n        | %    |     |     |               |         |
| <b><i>XRCC1</i> G399A polymorphisms§</b>                     |       |      |          |      |     |     |               |         |
| GG                                                           | 62    | 38.8 | 149      | 44.0 | 1.0 | 1.0 |               |         |
| GA                                                           | 94    | 58.8 | 169      | 49.9 | 1.3 | 1.2 | 0.76 to 1.94  | 0.43    |
| AA                                                           | 4     | 2.5  | 21       | 6.2  | 0.5 | 0.4 | 0.10 to 1.62  | 0.20    |
| <b><i>OGG1</i> C326G polymorphisms¶</b>                      |       |      |          |      |     |     |               |         |
| CC                                                           | 34    | 23.4 | 95       | 28.9 | 1.0 | 1.0 |               |         |
| CG                                                           | 109   | 75.2 | 229      | 69.6 | 1.4 | 1.2 | 0.70 to 2.07  | 0.49    |
| GG                                                           | 2     | 1.4  | 5        | 1.5  | 1.2 | 0.7 | 0.10 to 5.11  | 0.75    |
| <b>Cigarette smoking</b>                                     |       |      |          |      |     |     |               |         |
| Non-smoker                                                   | 92    | 42.0 | 230      | 52.5 | 1.0 | 1.0 |               |         |
| Smoker                                                       | 127   | 58.0 | 208      | 47.5 | 2.7 | 1.9 | 0.94 to 4.01  | 0.07    |
| <b>Units of alcohol per month of all alcohol consumption</b> |       |      |          |      |     |     |               |         |
| Non-drinker                                                  | 57    | 26.0 | 254      | 58.0 | 1.0 | 1.0 |               |         |
| <14                                                          | 79    | 36.1 | 92       | 21.0 | 5.2 | 5.2 | 2.74 to 9.95  | <0.001  |
| ≥14                                                          | 83    | 37.9 | 92       | 21.0 | 6.7 | 7.6 | 3.67 to 15.72 | <0.001  |

\*Crude odds ratio from matched case-control analysis.

†Adjusted odds ratio from matched case-control analysis (adjusted for all other variables in the table).

‡95% confidence interval for OR†.

§DNA samples for *XRCC1* genotyping were successfully carried out for 160 out of 175 cases, and 339 out of 350 controls.

¶DNA samples for *OGG1* genotyping were successfully carried out for 145 out of 175 cases, and 329 out of 350 controls.

**Table 4** Gene-environment interactions of *XRCC1* and *OGG1* polymorphisms together with smoking and alcohol drinking on cholangiocarcinoma risk in Khon Kaen, Thailand

| <i>XRCC1</i> | Smoking /<br>Use of alcohol                               | Cases | Controls | OR*  | 95% CI        | P-value       | <i>OGG1</i>  | Smoking /<br>Use of alcohol                               | Cases | Controls | OR*  | 95% CI        | P-value       |
|--------------|-----------------------------------------------------------|-------|----------|------|---------------|---------------|--------------|-----------------------------------------------------------|-------|----------|------|---------------|---------------|
|              |                                                           | n     | n        |      |               |               |              |                                                           | n     | n        |      |               |               |
| <b>G399A</b> | <b>All cigarettes smoking</b>                             |       |          |      |               | <i>0.87</i> † | <b>C326G</b> | <b>All cigarettes smoking</b>                             |       |          |      |               | <i>0.54</i> † |
| GG           | Non-smoker                                                | 22    | 71       | 1.0  |               |               | CC           | Non-smoker                                                | 14    | 55       | 1.0  |               |               |
| GA           | Non-smoker                                                | 48    | 99       | 1.5  | 0.82 to 2.79  | 0.18          | CG           | Non-smoker                                                | 49    | 122      | 1.5  | 0.77 to 2.99  | 0.22          |
| AA           | Non-smoker                                                | 2     | 11       | 0.6  | 0.11 to 2.74  | 0.47          | GG           | Non-smoker                                                | 1     | 1        | —    | —             | —             |
| GG           | Smoker                                                    | 40    | 78       | 2.8  | 1.30 to 5.91  | 0.01          | CC           | Smoker                                                    | 20    | 40       | 3.1  | 1.17 to 8.38  | 0.02          |
| GA           | Smoker                                                    | 46    | 70       | 3.4  | 1.60 to 7.28  | 0.001         | CG           | Smoker                                                    | 60    | 107      | 4.3  | 1.79 to 10.21 | 0.001         |
| AA           | Smoker                                                    | 2     | 10       | 1.2  | 0.21 to 6.29  | 0.86          | GG           | Smoker                                                    | 1     | 4        | 1.5  | 0.14 to 15.44 | 0.74          |
| <b>G399A</b> | <b>Units of alcohol per month of all alcohol drinking</b> |       |          |      |               | <i>0.80</i> † | <b>C326G</b> | <b>Units of alcohol per month of all alcohol drinking</b> |       |          |      |               | <i>0.74</i> † |
| GG           | Non-drinker                                               | 16    | 83       | 1.0  |               |               | CC           | Non-drinker                                               | 10    | 65       | 1.0  |               |               |
| GA           | Non-drinker                                               | 20    | 33       | 4.4  | 1.81 to 10.83 | 0.001         | CG           | Non-drinker                                               | 9     | 9        | 8.1  | 2.30 to 28.36 | 0.001         |
| AA           | Non-drinker                                               | 26    | 33       | 9.2  | 3.65 to 23.21 | <0.001        | GG           | Non-drinker                                               | 15    | 21       | 8.6  | 2.62 to 28.02 | <0.001        |
| GG           | <14                                                       | 22    | 102      | 1.1  | 0.49 to 2.28  | 0.89          | CC           | <14                                                       | 24    | 130      | 1.3  | 0.55 to 3.20  | 0.52          |
| GA           | <14                                                       | 39    | 35       | 8.8  | 3.76 to 20.71 | <0.001        | CG           | <14                                                       | 46    | 58       | 7.0  | 2.85 to 17.39 | <0.001        |
| AA           | <14                                                       | 33    | 32       | 10.3 | 4.14 to 25.80 | <0.001        | GG           | <14                                                       | 39    | 41       | 11.2 | 4.18 to 30.17 | <0.001        |
| GG           | ≥14                                                       | 1     | 12       | 0.4  | 0.05 to 3.71  | 0.44          | CC           | ≥14                                                       | 0     | 1        | —    | —             | —             |
| GA           | ≥14                                                       | 2     | 3        | 2.8  | 0.31 to 25.41 | 0.36          | CG           | ≥14                                                       | 1     | 1        | 7.7  | 0.29 to 26.73 | 0.22          |
| AA           | ≥14                                                       | 1     | 6        | 2.5  | 0.25 to 23.99 | 0.44          | GG           | ≥14                                                       | 1     | 3        | 6.4  | 0.48 to 86.72 | 0.16          |

\*Crude odds ratio from matched case-control analysis.

†P-value for interaction.

## Funding

This research was supported by the Thailand Research Fund (Research grant No. 540102) and the National Research University Project of Thailand, Office of the Higher Education Commission, through the Center of Excellence in Specific Health Problems in Greater Mekong Sub-region (SHeP-GMS), Khon Kaen University (Research grant No. NRU542005).

**Contributors** NS, SP, CP, TE and SW conceived and designed the research. NS and PC performed the research. NS and SP carried out the analyses. All authors contributed to the writing and revisions of the manuscript and approved the final version.

**Competing interests** No conflicts of competing interest.

**Provenance and peer review** Not commissioned; externally peer reviewed.

**Data sharing statement** No additional data are available.

**Ethics approval** Ethical approval was obtained from the Khon Kaen University Ethics Committee for Human Research (Reference No. HE512053).

## Figure Legends

**Figure 1** Polymorphisms in *XRCC1* G399A and *OGGI* C326G were analyzed using PCR with high resolution melting analysis.



## REFERENCES

1. Ferlay J, Shin HR, Bray F, *et al.* GLOBOCAN 2008 v2.0, Cancer Incidence and Mortality Worldwide: IARC CancerBase No.10 (Internet). Lyon, France: IARC; 2010.  
<http://globocan.iarc.fr> (accessed 27 Mar 2013).
2. Khuhaprema T, Attasara P, Sriplung H, *et al.* *Cancer in Thailand Volume VI, 2004-2006*. Bangkok: NCIB, 2012.
3. Parkin DM, Ohshima H, Srivatanakul P, *et al.* Cholangiocarcinoma: epidemiology, mechanisms of carcinogenesis and prevention. *Cancer Epidemiol Biomarkers Prev* 1993;2:537–44.
4. Stern MC, Conti DV, Siegmund KD, *et al.* DNA repair single-nucleotide polymorphisms in colorectal cancer and their role as modifiers of the effect of cigarette smoking and alcohol in the Singapore Chinese Health Study. *Cancer Epidemiol Biomarkers Prev* 2007;16:2363–72.
5. Huang WY, Gao YT, Rashid A, *et al.* Selected base excision repair gene polymorphisms and susceptibility to biliary tract cancer and biliary stones: a population-based case-control study in China. *Carcinogenesis* 2008;29:100–5.
6. Zhang M, Huang WY, Andreotti G, *et al.* Variants of DNA repair genes and the risk of biliary tract cancers and stones: a population-based study in China. *Cancer Epidemiol Biomarkers Prev* 2008;17:2123–7.
7. Srivastava A, Srivastava K, Pandey SN, *et al.* Single-nucleotide polymorphisms of DNA repair genes *OGG1* and *XRCC1*: association with gallbladder cancer in North Indian population. *Ann Surg Oncol* 2009;16:1695–703.

- 1  
2  
3 8. Thanan R, Murata M, Pinlaor S, *et al.* Urinary 8-oxo-7,8-dihydro-2'-deoxyguanosine in  
4 patients with parasite infection and effect of antiparasitic drug in relation to  
5  
6 cholangiocarcinogenesis. *Cancer Epidemiol Biomarkers Prev* 2008;17:518–24.  
7
- 8  
9  
10 9. Dechakhamphu S, Pinlaor S, Sitthithaworn P, *et al.* Lipid peroxidation and etheno DNA  
11 adducts in white blood cells of liver fluke-infected patients: protection by plasma alpha-  
12  
13 tocopherol and praziquantel. *Cancer Epidemiol Biomarkers Prev* 2010;19:310–8.  
14
- 15  
16  
17 10. Zeng L, You G, Tanaka H, *et al.* Combined effects of polymorphisms of DNA-repair protein  
18 genes and metabolic enzyme genes on the risk of cholangiocarcinoma. *Jpn J Clin Oncol*  
19  
20 2013;43: 1190–4.  
21  
22
- 23  
24  
25 11. Songserm N, Promthet S, Sithithaworn P, *et al.* *MTHFR* Polymorphisms and *Opisthorchis*  
26  
27 *viverrini* Infection: a Relationship with Increased Susceptibility to Cholangiocarcinoma in  
28  
29 Thailand. *Asian Pac J Cancer Prev* 2011;12:1341–5.  
30
- 31  
32 12. Songserm N, Promthet S, Sithithaworn P, *et al.* Risk factors for cholangiocarcinoma in high-  
33  
34 risk area of Thailand: Role of lifestyle, diet and methylenetetrahydrofolate reductase  
35  
36 polymorphisms. *Cancer Epidemiol* 2012;36:e89–94.  
37
- 38  
39 13. Kosti O, Byrne C, Meeker KL, *et al.* Mutagen sensitivity, tobacco smoking and breast cancer  
40  
41 risk: a case-control study. *Carcinogenesis* 2010;31:654–9.  
42
- 43  
44 14. Rouissi K, Ouerhani S, Hamrita B, *et al.* Smoking and polymorphisms in xenobiotic  
45  
46 metabolism and DNA repair genes are additive risk factors affecting bladder cancer in  
47  
48 Northern Tunisia. *Pathol Oncol Res* 2011;17:879–86.  
49
- 50  
51 15. Mena S, Ortega A, Estrela JM. Oxidative stress in environmental-induced carcinogenesis.  
52  
53 *Mutat Res* 2009;674:36–44.  
54
- 55  
56 16. Pelucchi C, Tramacere I, Boffetta P, *et al.* Alcohol consumption and cancer risk. *Nutr*  
57  
58 *Cancer* 2011;63:983–90.  
59  
60

17. Parkin DM, Srivatanakul P, Khlat M, *et al.* Liver cancer in Thailand. I. A case-control study of cholangiocarcinoma. *Int J Cancer* 1991;48:323–8.
18. Chernrungrroj G. Risk factors for cholangiocarcinoma: a case-control study (dissertation). Connecticut: Yale University, 2000.
19. Honjo S, Srivatanakul P, Sriplung H, *et al.* Genetic and environmental determinants of risk for cholangiocarcinoma via *Opisthorchis viverrini* in a densely infested area in Nakhon Phanom, northeast Thailand. *Int J Cancer* 2005;117:854–60.
20. Poomphakwaen K, Promthet S, Kamsa-Ard S, *et al.* Risk factors for cholangiocarcinoma in Khon Kaen, Thailand: a nested case-control study. *Asian Pac J Cancer Prev* 2009;10:251–8.
21. Chalasani N, Baluyut A, Ismail A, *et al.* Cholangiocarcinoma in patients with primary sclerosing cholangitis: a multicenter case-control study. *Hepatology* 2000;31:7–11.
22. Sriamporn S, Parkin DM, Pisani P, *et al.* A prospective study of diet, lifestyle, and genetic factors and the risk of cancer in Khon Kaen Province, northeast Thailand: description of the cohort. *Asian Pac J Cancer Prev* 2005;6:295–303.
23. Kietthubthew S, Sriplung H, Au WW, *et al.* Polymorphism in DNA repair genes and oral squamous cell carcinoma in Thailand. *Int J Hyg Environ Health* 2006;209:21–9.
24. Sangrajrang S, Schmezer P, Burkholder I, *et al.* Polymorphisms in three base excision repair genes and breast cancer risk in Thai women. *Breast Cancer Res Treat* 2008;111:279–88.
25. Settheetham-Ishida W, Yuenyao P, Natphopsuk S, *et al.* Genetic Risk of DNA Repair Gene Polymorphisms (*XRCC1* and *XRCC3*) for High Risk Human Papillomavirus Negative Cervical Cancer in Northeast Thailand. *Asian Pac J Cancer Prev* 2011;12:963–6.
26. Klinchid J, Chewaskulyoung B, Saeteng S, *et al.* Effect of combined genetic polymorphisms on lung cancer risk in northern Thai women. *Cancer Genet Cytogenet* 2009;195:143–9.

- 1  
2  
3  
4  
5  
6  
7  
8  
9  
10  
11  
12  
13  
14  
15  
16  
17  
18  
19  
20  
21  
22  
23  
24  
25  
26  
27  
28  
29  
30  
31  
32  
33  
34  
35  
36  
37  
38  
39  
40  
41  
42  
43  
44  
45  
46  
47  
48  
49  
50  
51  
52  
53  
54  
55  
56  
57  
58  
59  
60
27. Mohrenweiser HW, Wilson DM 3rd, Jones IM. Challenges and complexities in estimating both the functional impact and the disease risk associated with the extensive genetic variation in human DNA repair genes. *Mutat Res* 2003;526:93–125.
28. Lunn RM, Langlois RG, Hsieh LL, *et al.* *XRCC1* polymorphisms: effects on aflatoxin B1-DNA adducts and glycophorin A variant frequency. *Cancer Res* 1999;59:2557–61.
29. Duell EJ, Millikan RC, Pittman GS, *et al.* Polymorphisms in the DNA repair gene *XRCC1* and breast cancer. *Cancer Epidemiol Biomarkers Prev* 2001;10:217–22.
30. Matullo G, Guarrera S, Carturan S, *et al.* DNA repair gene polymorphisms, bulky DNA adducts in white blood cells and bladder cancer in a case-control study. *Int J Cancer* 2001;92:562–7.
31. Vodicka P, Stetina R, Polakova V, *et al.* Association of DNA repair polymorphisms with DNA repair functional outcomes in healthy human subjects. *Carcinogenesis* 2007;28:657–64.

1  
2  
3 **Gene-environment interaction involved in cholangiocarcinoma in Thai population:**  
4  
5 **polymorphisms of DNA repair genes, smoking and use of alcohol**  
6  
7  
8  
9

10 **Corresponding author**

11 Professor Supanee Promthet, Department of Epidemiology, Faculty of Public Health, Khon

12 Kaen University, Khon Kaen, 40002, Thailand

13 Phone: +66(0) 43-347057; Fax +66(0) 43-347058; E-mail: supanee@kku.ac.th  
14  
15  
16  
17  
18  
19  
20  
21  
22

23 **Author names**

24 Nopparat Songserm,<sup>1</sup> Supanee Promthet,<sup>2</sup> Chamsai Pientong,<sup>3</sup> Tipaya Ekalaksananan,<sup>3</sup>

25  
26  
27  
28  
29  
30  
31  
32  
33  
34  
35  
36  
37  
38  
39  
40  
41  
42  
43  
44  
45  
46  
47  
48  
49  
50  
51  
52  
53  
54  
55  
56  
57  
58  
59  
60

28  
29  
30  
31  
32  
33  
34  
35  
36  
37  
38  
39  
40  
41  
42  
43  
44  
45  
46  
47  
48  
49  
50  
51  
52  
53  
54  
55  
56  
57  
58  
59  
60

Peechanika Chopjitt,<sup>3</sup> Surapon Wiangnon,<sup>4,5</sup>

32 **Author affiliations**

33  
34  
35  
36  
37  
38  
39  
40  
41  
42  
43  
44  
45  
46  
47  
48  
49  
50  
51  
52  
53  
54  
55  
56  
57  
58  
59  
60

35  
36  
37  
38  
39  
40  
41  
42  
43  
44  
45  
46  
47  
48  
49  
50  
51  
52  
53  
54  
55  
56  
57  
58  
59  
60

<sup>1</sup>Department of Community Health, Faculty of Public Health, Ubon Ratchathani Rajabhat University, Thailand

<sup>2</sup>Department of Epidemiology, Faculty of Public Health, Khon Kaen University, Thailand

<sup>3</sup>Department of Microbiology, Faculty of Medicine, Khon Kaen University, Thailand

<sup>4</sup>Department of Paediatrics, Faculty of Medicine, Khon Kaen University, Thailand

<sup>5</sup>Cancer Unit, Faculty of Medicine, Khon Kaen University, Thailand

51 **Keywords:** Cholangiocarcinoma, Polymorphisms, DNA repair genes, Smoking, Alcohol  
52  
53  
54  
55  
56  
57  
58  
59  
60

51  
52  
53  
54  
55  
56  
57  
58  
59  
60

drinking

56 **Word count:** 2759 words

## ABSTRACT

**Objective:** Cholangiocarcinoma (CCA) is the most common malignancy in a Northeast Thai population. Smoking and alcohol drinking are associated with production of free radical intermediates, which can cause several types of DNA lesions. Reduced repair of these DNA lesions would constitute an important risk factor for cancer development. We therefore examined that whether polymorphisms in DNA base-excision repair (BER) genes, *XRCC1* G399A and *OGG1* C326G, were associated with CCA risk and whether they modified the effect of smoking and alcohol drinking in Thai population.

**Design:** A nested case-control study within cohort study was conducted: 219 subjects with primary CCA were each matched with two non-cancer controls from the same cohort on sex, age at recruitment and presence/absence of *Opisthorchis viverrini* eggs in stools. Smoking and alcohol consumption were assessed on recruitment. Polymorphisms in BER genes were analyzed using a polymerase chain reaction with high resolution melting analysis. The associations were assessed using conditional logistic regression.

**Results:** Our results suggest that in Thai population polymorphisms in *XRCC1* and *OGG1* genes, particularly in combination, are associated with increased susceptibility to CCA, and that their role as modifiers of the effect of smoking and alcohol consumption influences the risk of CCA.

**Conclusions:** Better ways of reducing habitual smoking and alcohol consumption, targeted toward subgroups which are genetically susceptible, are recommended. CCA is multi-factorial disease, and a comprehensive approach is needed for its effective prevention. This approach would also have the additional advantage of reducing the onset of other cancers.

### Strengths and limitations of this study

- This was a nested case-control study within the cohort study. This design has the advantage of minimising a systematic recall bias which can occur when the receipt of diagnosis of cancer leads to subjects modifying their self-reported personal histories, in this case, their recall of cigarette smoking and alcohol consumption. This was prevented in the present study because subjects were interviewed at the time of recruitment, before case or control status was defined.
- The diagnosis of cholangiocarcinoma was not histologically confirmed in all the cases.
- This study did not include the population aged 70 years and above.
- **In future research, larger samples are needed to increase the power of the studies.**

## INTRODUCTION

The data from GLOBOCAN 2008 shows that liver cancer is the fourth most common cause of death from cancer worldwide.<sup>1</sup> It is the most common cancer in Northeast Thailand, where the great majority of cases are cholangiocarcinomas (CCA).<sup>2</sup> Data from the Khon Kaen Cancer Registry (KKCR) have shown that the estimated age-standardised incidence rates for men and women are 84.6 and 36.8 per 100 000, respectively.<sup>3</sup>

Among several types of DNA damage induced by carcinogens from tobacco and alcohol are oxidative base damage and single-strand breaks, which are repaired by the base-excision repair pathway (BER).<sup>4</sup> Genetic variants and polymorphisms in DNA repair pathways have been reported to affect the levels of DNA lesions, which accumulate in the epithelial tissue of the hepatobiliary tract system, thus influencing the susceptibility to biliary tract cancers and stones in a Chinese population<sup>5, 6</sup> and gallbladder cancer in an Indian population.<sup>7</sup> **There were very few studies** on this topic in relation to CCA in Thai population, but there have been studies, which clarify the role of the accumulation of levels of oxidative DNA lesions in liver fluke-infected- and CCA patients<sup>8-10</sup>; these studies concluded that some biomarkers from oxidative DNA lesions induced by liver fluke infection – a major risk factor – may play an important role in CCA development. However, the results from our previous study showed that not only liver fluke infection but also certain lifestyle and dietary co-factors were associated with increased risk of CCA.<sup>11, 12</sup> Long-term smoking<sup>13, 14</sup> and alcohol drinking<sup>4, 15, 16</sup> are associated with production of free radical intermediates, which can cause several kinds of DNA lesions. Reduced repair of these DNA lesions would constitute an important risk factor for cancer development. With respect to genetic factors, a number of polymorphisms in various DNA repair genes have been discovered, and it is possible that these polymorphisms may affect DNA repair capacity and thus modulate susceptibility to cancer. Investigations are therefore needed into the different patterns of



1  
2  
3 smoking and alcohol drinking in relation to susceptibility to CCA, along with DNA repair  
4  
5 capacity induced by genetic variations or polymorphisms.  
6  
7

8 Although cigarette smoking was not associated with CCA development in the previous  
9  
10 studies conducted in Thailand<sup>12, 17-20</sup> and elsewhere,<sup>21</sup> a modifying effect by DNA repair genes  
11  
12 remains a possibility. With respect to the use of alcohol, this was related to a substantially  
13  
14 increased risk of CCA in our previous study.<sup>12</sup> At the molecular level, it is known that single-  
15  
16 nucleotide polymorphisms (SNPs) in genes participate biochemically in the base-excision repair  
17  
18 pathway (X-ray repair cross-complementing group 1: *XRCC1* and 8-oxoguanine DNA  
19  
20 glycosylase 1: *OGG1*), which repairs smoking- and alcohol-induced oxidative DNA base  
21  
22 modifications.<sup>4</sup>  
23  
24  
25  
26

27 In this present study, we therefore investigated whether polymorphisms in DNA base-  
28  
29 excision repair genes (*XRCC1* G399A and *OGG1* C326G) are associated with CCA risk and  
30  
31 whether their effects are modified by cigarette smoking and alcohol drinking in a Northeastern  
32  
33 Thai population residing in a high-incidence area of opisthorchiasis-related CCA. The selection  
34  
35 of these SNPs in DNA base-excision repair genes was based on their putative effect on protein  
36  
37 function and/or previous evidence of associations with the risk of hepatobiliary tract cancers in  
38  
39 Asian, Chinese and Indian populations<sup>5-7</sup> and the combined effects of a DNA-repair gene and  
40  
41 metabolic gene polymorphisms on CCA risk in Thailand.<sup>10</sup> However, these studies involved only  
42  
43 gene-gene interactions. There is need for studies of gene-environment interactions, especially  
44  
45 between DNA-repair genes and exposure to the carcinogenic effects of tobacco/alcohol  
46  
47 carcinogens in relation to CCA risk.  
48  
49  
50  
51  
52  
53  
54  
55  
56  
57  
58  
59  
60

## MATERIALS AND METHODS

### Study subjects

This was a case-control study nested within the 23 584 subjects of the Khon Kaen Cohort Study (KKCS). Details of the KKCS and the selection of CCA cases and controls used in the present study have been previously reported.<sup>11, 12, 22</sup> Briefly, 219 (0.9%) cohort members who had developed a primary CCA, diagnosis at least by ultrasound, with or without contrast radiology, tumour markers (such as CA19-9) or histopathology, six or more months after enrollment were identified. The vital status and date of death of potential cases were ascertained by linkage to the files of deaths in Thailand, which are held in the database of the National Health Security Office and the demographic database of Ministry of Interior. All cases had died within two years of diagnosis. Two non-cancer controls from the same cohort population were randomly selected for matching with each case on sex, age at recruitment ( $\pm 3$  years) and presence/absence of liver fluke eggs in the faeces at recruitment (detected by the formalin ethyl acetate concentration technique). This research was approved by the Khon Kaen University Ethics Committee for Human Research (Reference No. HE512053).

### Assessment of cigarette smoking and alcohol drinking

Definitions of alcohol use, cigarette smoking and levels of consumption of alcohol were the same as those previously described.<sup>12</sup> A smoker was defined as someone who had ever smoked any type of cigarette on a daily basis. However, in the present study smokers were categorized into four groups according to age when they began smoking. The 1<sup>st</sup>, 2<sup>nd</sup> and 3<sup>rd</sup> quartiles obtained from the control group frequency distribution for age of starting to smoke were used as the cut-offs for the four groups.

1  
2  
3 Ever drinkers were defined as those who consumed at least one type of alcoholic beverage  
4 (beer, *Sato*, white whisky, red whisky and other whiskies) at least once a month; those drinking  
5 less than this were defined as non-drinkers. The consumption of each subject was calculated in  
6 terms of units of alcohol, where a unit corresponds to 10 ml (approximately 8 gm) of ethanol.  
7  
8 The number of units of alcohol in a drink was determined by multiplying volume of the drink (in  
9 milliliters) by its alcohol percentage (beer 5.0%, *Sato* 7.0%, white whisky 40%, red whisky 35%)  
10 and dividing by 1000. Drinkers were dichotomized according to units of alcohol consumed per  
11 month on the basis of the median monthly consumption for the controls.  
12  
13  
14  
15  
16  
17  
18  
19  
20  
21  
22  
23

## 24 **Laboratory methods**

### 25 ***Specimen collection and DNA extraction***

26  
27 Blood samples (buffy coat) were available for 175 (80%) of the 219 eligible CCA cases;  
28 specimens were retrieved from the KKCS bio-bank for these cases and for the 350 matched  
29 controls. Genomic DNA was extracted from buffy coat fractions using the standard protocols of  
30 Genomic DNA Mini Kit with Proteinase K (Geneaid Biotech). Of those with DNA samples,  
31 genotyping was successfully carried out for 95% (499 out of 525) of all samples for *XRCC1* and  
32 for 90% (474 out of 525) of all samples for *OGGI*. Laboratory personnel were blinded to the  
33 case-control status of the available samples.  
34  
35  
36  
37  
38  
39  
40  
41  
42  
43  
44  
45  
46  
47

### 48 ***PCR amplification and genetic polymorphisms detection***

49  
50 The real-time polymerase chain reactions with high resolution melting analysis (Real-time  
51 PCR-HRM) technique of DNA amplification for the DNA base-excision repair genes (*XRCC1*  
52 and *OGGI*) polymorphisms were performed in a 96-well plate in the LightCycler<sup>®</sup> 480 Real-  
53 Time PCR System.  
54  
55  
56  
57  
58  
59  
60

1  
2  
3 The amplification of *XRCC1* G399A used two primers, [F]:5'-AGT GGG TGC TGG  
4 ACT GTC-3' and [R]:5'-TTG CCC AGC ACA GGA TAA-3', and was performed in a  
5 LightCycler<sup>®</sup> 480 Real-Time PCR System with a final volume of 20 µl containing 10 µl of  
6 master mix, 4.4 µl of H<sub>2</sub>O, 3 mM of MgCl<sub>2</sub>, 0.3 µM of each primer and 200 ng of the DNA  
7 template. The amplification of the *OGGI* C326G was performed in the same way, but the  
8 primers were [F]:5'-CCT ACA GGT GCT GTT CAG T-3' and [R]:5'-CCT TTG GAA CCC TTT  
9 CTG-3'.  
10  
11  
12  
13  
14  
15  
16  
17  
18  
19

20 HRM data were analyzed using the LightCycler 480<sup>®</sup> Gene Scanning Software version  
21 1.5 (Roche). Normalized and temperature-shifted melting curves carrying a sequence variation  
22 were evaluated and compared with the wild-type sample. Sequence variations were distinguished  
23 by different shape of melting curves (Figure 1(A) for *XRCC1* G399A and (B) for *OGGI* C326G).  
24 Melting peaks of sequence variation were analyzed and compared with the wild-type sample.  
25 Different plots were distinguished by different melting peaks for each genotype (Figure 1(C) for  
26 *XRCC1* G399A and (D) for *OGGI* C326G). To improve the genotyping quality and validation,  
27 genotyping of 10% of random samples was confirmed by the PCR with restriction fragment  
28 length polymorphism techniques (PCR-RFLP).  
29  
30  
31  
32  
33  
34  
35  
36  
37  
38  
39  
40  
41  
42  
43

#### 44 **Statistical analysis**

45 To assess the strength of the associations between polymorphisms in DNA base-excision repair  
46 genes (*XRCC1* and *OGGI*) and the risk of CCA, odds ratio (ORs) with 95% confidence intervals  
47 (CIs) were estimated using conditional logistic regression. A univariate analysis using  
48 McNemar's chi-square test and conditional logistic regression was carried out to explore the  
49 associations between DNA-repair genes polymorphisms, smoking and alcohol drinking, and the  
50 risk of CCA. Factors found to have a strong association with CCA in the univariate analysis (p  
51  
52  
53  
54  
55  
56  
57  
58  
59  
60

1  
2  
3 <0.05), and factors without association in the univariate analysis, but found to play important  
4 roles as factors for CCA risk from literature reviews, were included in the multivariate analysis.  
5  
6 Possible modifications of the effects of smoking and alcohol drinking by polymorphisms in  
7  
8 *XRCCI* G399A and *OGGI* C326G were also analyzed. A *P*-value <0.05 was considered  
9  
10 statistically significant. All statistical analyses were performed with a statistical package, STATA  
11  
12 version 10 (Stata, College Station, TX).  
13  
14  
15  
16  
17  
18  
19

## 20 RESULTS

21  
22 There were 219 cohort members who had developed a primary CCA six or more months after  
23 enrollment into the KKCS. They comprised 92 females and 127 males, with a median age of 57  
24 years (minimum 31, maximum 69). There were two controls matched by age and sex for each  
25 case. Table 1 shows the distribution of *XRCCI* G399A and *OGGI* C326G polymorphisms in  
26 cases and controls, the joint distribution of those polymorphisms, and the associated odds ratios.  
27  
28 While there were no associations between any of these individual polymorphisms and the risk of  
29 CCA, the combinations of *XRCCI* GA heterozygous and *OGGI* CC wild-type or CG  
30 heterozygous, and of *XRCCI* GG wild-type and *OGGI* CG heterozygous, were significantly  
31 related to a reduced risk of CCA (*P*-value <0.001). Conversely, the combinations of the *OGGI*  
32 GG mutant, homozygous with all three genotypes of *XRCCI* (wild-type, heterozygous and  
33 mutant homozygous), were significantly associated with an increased risk of CCA (*P*-value =  
34 0.01, 0.03 and 0.004, respectively), but there were no interactions between the polymorphisms of  
35  
36  
37  
38  
39  
40  
41  
42  
43  
44  
45  
46  
47  
48  
49  
50  
51  
52  
53  
54  
55  
56  
57  
58  
59  
60

53 In the univariate analysis (Table 2), there were significant associations between cigarette  
54 smoking and alcohol consumption and the risk of CCA, and their joint effect appeared to be  
55  
56  
57  
58  
59  
60

1  
2  
3 multiplicative with no interactions between them. There was trend in risk with smoking  
4  
5 frequency or number of years of habitual smoking ( $P$ -value for trend = 0.002).  
6  
7

8 In the multivariate analysis (Table 3), shows the adjusted ORs and 95% CIs from the  
9  
10 multivariate analysis. There was a clear association with alcohol drinking: compared with non-  
11  
12 drinkers, individuals who consumed <14 units of alcohol per month had an increased risk of CCA  
13  
14 (OR=5.2, 95% CI 2.74 to 9.95), and the risk was higher still in those who consumed  $\geq$ 14 units of  
15  
16 alcohol per month (OR=7.6, 95% CI 3.67 to 15.72).  
17  
18  
19

20 Table 4 shows the results of gene-environment interaction of the *XRCC1* and *OGGI*  
21  
22 polymorphisms along with smoking and alcohol drinking on the risk of CCA. When compared  
23  
24 with the reference subjects (nonsmokers with the *XRCC1* GG wild-type), smokers carrying the  
25  
26 *XRCC1* GG wild-type had an increased susceptibility to CCA (OR=2.8, 95% CI 1.30 to 5.91),  
27  
28 and this was higher still in smokers with GA heterozygous (OR=3.4, 95% CI 1.60 to 7.28).  
29  
30 Moreover, smokers with the *OGGI* CC wild-type and CG heterozygous had an increased risk of  
31  
32 CCA compared with nonsmokers with the wild-type. With respect to alcohol consumption, some  
33  
34 combinations of alcohol drinking and mutant polymorphisms of both *XRCC1* and *OGGI* were  
35  
36 statistically significant. For example, compared with the reference group (nondrinkers with the  
37  
38 *XRCC1* GG wild-type), subjects with the *XRCC1* GA heterozygous who were nondrinkers or  
39  
40 drinkers (<14 units of alcohol per month) had an increased susceptibility to CCA (4.4-fold  
41  
42 increased to 8.8-fold). Similarly, subjects with the *XRCC1* AA variant genotype had an increased  
43  
44 risk of CCA (9.2-fold in nondrinkers increased to 10.3-fold in drinkers of <14 units of alcohol per  
45  
46 month). Again, there were no interactions between *XRCC1* or *OGGI* polymorphisms and  
47  
48 smoking or alcohol drinking.  
49  
50  
51  
52  
53  
54  
55  
56  
57  
58  
59  
60

## DISCUSSION

This was a case-control study nested within the 23 584 Khon Kaen Cohort Study (KKCS).<sup>11, 12, 22</sup>

The design of this study minimises recall bias of cigarette smoking and alcohol drinking, as subjects were interviewed at the time of recruitment, before case or control status was defined.

This design is very useful for examining the role of self-reported factors such as cigarette smoking and alcohol consumption, which are modified when cancer is present.

Smoking was not associated with CCA development in this present study (after adjustment for all other variables in the multivariate analysis) – polymorphisms in *XRCC1* and *OGG1*, cigarette smoking and units of alcohol per month of all alcohol consumption.

Alcohol consumption was significantly associated with an increased risk of CCA in previous studies in Thailand<sup>18, 19</sup> and elsewhere.<sup>21</sup> Alcohol may affect metabolic pathways of endogenous and exogenous nitrosamines<sup>16, 19</sup> and it is associated with production of free radical intermediate, which can cause several kinds of DNA lesions.<sup>4, 15, 16</sup> Reduced repair of these DNA lesions would therefore constitute a major risk factor for cancer development.<sup>15, 16</sup>

The genotype frequencies of *XRCC1* and *OGG1* polymorphisms found in the controls for the present study were consistent with those found in other studies in Thailand: the prevalence of G allele of *XRCC1* codon 399 was 68.88% in the present study compared with 36.59%–73.20% in other studies<sup>10, 23-25</sup> and A allele of *XRCC1* codon 399 was 31.12% in controls (prevalence of A allele was 26.80%–52.56%). In our analysis of the *OGG1* codon 326, the genotype distribution in the controls deviated from the Hardy–Weinberg equilibrium. Genotype frequency of *OGG1* C326G in controls was slightly higher than rates noted in reports from other studies in Thailand.<sup>10, 24, 26</sup> The C allele of *OGG1* codon 326 was 63.68% in controls (C allele prevalence was between 50.12%–55.00%) and G allele of *OGG1* codon 326 was 36.32% in controls (prevalence of G allele in *OGG1* codon 326 was between 45.00%–49.88%).

1  
2  
3  
4  
5  
6  
7  
8  
9  
10  
11  
12  
13  
14  
15  
16  
17  
18  
19  
20  
21  
22  
23  
24  
25  
26  
27  
28  
29  
30  
31  
32  
33  
34  
35  
36  
37  
38  
39  
40  
41  
42  
43  
44  
45  
46  
47  
48  
49  
50  
51  
52  
53  
54  
55  
56  
57  
58  
59  
60

*XRCCI* and *OGGI* are major DNA repair genes involved in BER. Mutations and polymorphisms in DNA repair genes, which affect the efficiency of DNA damage repair, may increase an individual's susceptibility to several cancers<sup>23-26</sup> including cancers of the hepatobiliary tract.<sup>5-7</sup> However, no studies on this topic have been conducted in relation to CCA susceptibility and especially not in Thailand where the incidence of CCA is highest in the world.<sup>17</sup> However, there are four studies in a Thai population, which investigated relationships between the BER gene polymorphisms and other common cancers. Whereas *XRCCI* G399A polymorphisms tend to be associated with a reduced risk of oral squamous cell carcinoma,<sup>23</sup> they are associated with increased risks of breast<sup>24</sup> and cervical cancers,<sup>25</sup> and *OGGI* C326G polymorphisms tend to be related to increased risks of breast<sup>24</sup> and lung cancers.<sup>26</sup>

Several studies have explored the associations between polymorphisms of the DNA repair genes involved in BER (*XRCCI* G399A and *OGGI* C326G) and the risk of various cancers, but they have shown inconsistent results. This may be the consequence of the different modifying effects, which these polymorphisms have on the balance during the DNA repair process. Imbalance in the tightly regulated process can be caused by SNPs and will result in deficient DNA repair and an increase in DNA breaks.<sup>27</sup> The *XRCCI* codon 399 A allele and the *OGGI* 326 G allele have been associated with a reduced capacity of the DNA repair process as detected by the persistence of DNA bulky adducts<sup>28-30</sup> and  $\gamma$ -irradiation induced oxidative DNA damage.<sup>31</sup> In addition, the balance may be modified by smoking- and alcohol-induced oxidative DNA base modifications interacting with the repair inefficiency of BER polymorphisms<sup>4</sup>; for example, the *XRCCI* GA variant heterozygous carriers, who were nondrinkers or drinkers of <14 units of alcohol per month, had an increased susceptibility to CCA (4.4-fold in nondrinkers increase to



1  
2  
3 8.8-fold in drinkers) when compared with nondrinkers carrying the *XRCC1* GG wild-type (Table  
4  
5  
6 4).

7  
8 In conclusion, this study is the first report of possible associations between the main  
9  
10 polymorphisms in BER genes (*XRCC1* G399A, *OGGI* C326G), the joint effects of both genes,  
11  
12 and their modification of the effects of cigarette smoking and alcohol drinking on CCA risk in a  
13  
14 Thai population. Our results suggest that polymorphisms in *XRCC1* and *OGGI* genes,  
15  
16 particularly in combination, were associated with increased susceptibility to CCA. CCA is a  
17  
18 multifaceted disease requiring a broad range of preventative actions. In the context of the present  
19  
20 study, there is a need for more effective programmes for smoking cessation and reducing alcohol  
21  
22 consumption, targeted especially at subgroups which are genetically at particular risk for CCA.  
23  
24  
25  
26  
27 Such an approach could also help in the prevention of other forms of cancer.  
28  
29  
30  
31  
32  
33  
34  
35  
36  
37  
38  
39  
40  
41  
42  
43  
44  
45  
46  
47  
48  
49  
50  
51  
52  
53  
54  
55  
56  
57  
58  
59  
60

**Table 1** Univariate analysis of *XRCC1* and *OGG1* polymorphisms with the risk of cholangiocarcinoma in Khon Kaen, Thailand

| Genetic polymorphisms                          | Cases |      | Controls |      | OR*  | 95% CI       | P-value       |        |
|------------------------------------------------|-------|------|----------|------|------|--------------|---------------|--------|
|                                                | n     | %    | n        | %    |      |              |               |        |
| <b><i>XRCC1</i> G399A<sup>†</sup></b>          |       |      |          |      |      |              |               |        |
| GG                                             | 62    | 38.8 | 149      | 44.0 | 1.0  |              |               |        |
| GA                                             | 94    | 58.8 | 169      | 49.9 | 1.3  | 0.89 to 1.97 | 0.17          |        |
| AA                                             | 4     | 2.5  | 21       | 6.2  | 0.5  | 0.16 to 1.42 | 0.18          |        |
| GA or AA (any A allele)                        | 98    | 61.3 | 190      | 56.1 | 1.2  | 0.82 to 1.78 | 0.33          |        |
| <b><i>OGG1</i> C326G<sup>‡</sup></b>           |       |      |          |      |      |              |               |        |
| CC                                             | 34    | 23.5 | 95       | 28.9 | 1.0  |              |               |        |
| CG                                             | 109   | 75.2 | 229      | 69.6 | 1.4  | 0.86 to 2.23 | 0.18          |        |
| GG                                             | 2     | 1.4  | 5        | 1.5  | 1.2  | 0.22 to 7.03 | 0.80          |        |
| CG or GG (any G allele)                        | 111   | 76.6 | 234      | 71.1 | 1.4  | 0.86 to 2.22 | 0.18          |        |
| <b><u>Joint effects</u></b>                    |       |      |          |      |      |              |               |        |
| <b><i>XRCC1</i> G399A    <i>OGG1</i> C326G</b> |       |      |          |      |      |              |               |        |
| GG                                             | CC    | 14   | 9.7      | 41   | 12.7 | 1.0          |               |        |
| GA                                             | CC    | 19   | 13.1     | 47   | 14.5 | 0.3          | 0.15 to 0.55  | <0.001 |
| AA                                             | CC    | 2    | 1.4      | 4    | 1.2  | 3.5          | 1.10 to 14.60 | 0.03   |
| GG                                             | CG    | 42   | 29.0     | 100  | 30.9 | 0.1          | 0.07 to 0.25  | <0.001 |
| GA                                             | CG    | 56   | 38.6     | 108  | 33.3 | 0.1          | 0.07 to 0.22  | <0.001 |
| AA                                             | CG    | 3    | 2.1      | 15   | 4.6  | 0.9          | 0.42 to 2.07  | 1.00   |
| GG                                             | GG    | 5    | 3.4      | 3    | 0.9  | 4.7          | 1.30 to 25.33 | 0.01   |
| GA                                             | GG    | 2    | 1.4      | 4    | 1.2  | 3.5          | 1.10 to 14.60 | 0.03   |
| AA                                             | GG    | 2    | 1.4      | 2    | 0.6  | 7.0          | 1.61 to 63.46 | 0.004  |
| <i>P-value for interaction = 0.21</i>          |       |      |          |      |      |              |               |        |

\*Crude odds ratio from matched case-control analysis.

<sup>†</sup>DNA samples for *XRCC1* genotyping were successfully carried out for 160 out of 175 cases, and 339 out of 350 controls.

<sup>‡</sup>DNA samples for *OGG1* genotyping were successfully carried out for 145 out of 175 cases, and 329 out of 350 controls.

**Table 2** Univariate analysis of cigarette smoking and alcohol drinking on the risk of cholangiocarcinoma in Khon Kaen, Thailand

| Variables                                                     | Cases |      | Controls |      | OR*  | 95% CI        | P-value |
|---------------------------------------------------------------|-------|------|----------|------|------|---------------|---------|
|                                                               | n     | %    | n        | %    |      |               |         |
| <b>Cigarette smoking</b>                                      |       |      |          |      |      |               |         |
| Non-smoker                                                    | 92    | 42.0 | 230      | 52.5 | 1.0  |               |         |
| Smoker                                                        | 127   | 58.0 | 208      | 47.5 | 2.7  | 1.57 to 4.50  | <0.001  |
| <b>Age at which smoking started of all cigarettes (years)</b> |       |      |          |      |      |               |         |
| Non-smoker                                                    | 92    | 42.0 | 230      | 52.5 | 1.0  |               |         |
| <17                                                           | 28    | 12.8 | 48       | 11.0 | 2.9  | 1.38 to 5.91  | 0.01    |
| 17–19                                                         | 35    | 16.0 | 44       | 10.1 | 3.6  | 1.85 to 7.17  | <0.001  |
| 20–21                                                         | 40    | 18.3 | 70       | 16.0 | 2.5  | 1.33 to 4.62  | 0.004   |
| 22+                                                           | 24    | 11.0 | 46       | 10.5 | 2.4  | 1.19 to 4.73  | 0.01    |
| <i>P-value for trend = 0.002</i>                              |       |      |          |      |      |               |         |
| <b>Alcohol consumption</b>                                    |       |      |          |      |      |               |         |
| No                                                            | 57    | 26.0 | 254      | 58.0 | 1.0  |               |         |
| Yes                                                           | 162   | 74.0 | 184      | 42.0 | 5.7  | 3.61 to 9.04  | <0.001  |
| <b>Units of alcohol per month of all alcohol consumption</b>  |       |      |          |      |      |               |         |
| Non-drinker                                                   | 57    | 26.0 | 254      | 58.0 | 1.0  |               |         |
| <14                                                           | 79    | 36.1 | 92       | 21.0 | 5.2  | 3.15 to 8.43  | <0.001  |
| ≥14                                                           | 83    | 37.9 | 92       | 21.0 | 6.7  | 3.90 to 11.38 | <0.001  |
| <b>Alcohol consumption and smoking</b>                        |       |      |          |      |      |               |         |
| No alcohol, non-smoker                                        | 42    | 19.2 | 178      | 40.6 | 1.0  |               |         |
| No alcohol, smoker                                            | 15    | 6.9  | 76       | 17.4 | 2.2  | 0.93 to 5.00  | 0.07    |
| Alcohol drinker, non-smoker                                   | 50    | 22.8 | 52       | 11.9 | 5.8  | 3.12 to 10.78 | <0.001  |
| Alcohol drinker, smoker                                       | 112   | 51.1 | 132      | 30.1 | 10.4 | 5.07 to 21.16 | <0.001  |
| <i>P-value for trend &lt;0.001</i>                            |       |      |          |      |      |               |         |
| <i>P-value for interaction = 0.68</i>                         |       |      |          |      |      |               |         |

\*Crude odds ratio from matched case-control analysis.

**Table 3** Cases and controls, and odds ratios for cholangiocarcinoma associated with smoking, alcohol drinking, and *XRCC1* and *OGG1* polymorphisms

| Variables                                                    | Cases |      | Controls |      | OR* | OR† | 95% CI‡       | P-value |
|--------------------------------------------------------------|-------|------|----------|------|-----|-----|---------------|---------|
|                                                              | n     | %    | n        | %    |     |     |               |         |
| <b><i>XRCC1</i> G399A polymorphisms§</b>                     |       |      |          |      |     |     |               |         |
| GG                                                           | 62    | 38.8 | 149      | 44.0 | 1.0 | 1.0 |               |         |
| GA                                                           | 94    | 58.8 | 169      | 49.9 | 1.3 | 1.2 | 0.76 to 1.94  | 0.43    |
| AA                                                           | 4     | 2.5  | 21       | 6.2  | 0.5 | 0.4 | 0.10 to 1.62  | 0.20    |
| <b><i>OGG1</i> C326G polymorphisms¶</b>                      |       |      |          |      |     |     |               |         |
| CC                                                           | 34    | 23.4 | 95       | 28.9 | 1.0 | 1.0 |               |         |
| CG                                                           | 109   | 75.2 | 229      | 69.6 | 1.4 | 1.2 | 0.70 to 2.07  | 0.49    |
| GG                                                           | 2     | 1.4  | 5        | 1.5  | 1.2 | 0.7 | 0.10 to 5.11  | 0.75    |
| <b>Cigarette smoking</b>                                     |       |      |          |      |     |     |               |         |
| Non-smoker                                                   | 92    | 42.0 | 230      | 52.5 | 1.0 | 1.0 |               |         |
| Smoker                                                       | 127   | 58.0 | 208      | 47.5 | 2.7 | 1.9 | 0.94 to 4.01  | 0.07    |
| <b>Units of alcohol per month of all alcohol consumption</b> |       |      |          |      |     |     |               |         |
| Non-drinker                                                  | 57    | 26.0 | 254      | 58.0 | 1.0 | 1.0 |               |         |
| <14                                                          | 79    | 36.1 | 92       | 21.0 | 5.2 | 5.2 | 2.74 to 9.95  | <0.001  |
| ≥14                                                          | 83    | 37.9 | 92       | 21.0 | 6.7 | 7.6 | 3.67 to 15.72 | <0.001  |

\*Crude odds ratio from matched case-control analysis.

†Adjusted odds ratio from matched case-control analysis (adjusted for all other variables in the table).

‡95% confidence interval for OR†.

§DNA samples for *XRCC1* genotyping were successfully carried out for 160 out of 175 cases, and 339 out of 350 controls.

¶DNA samples for *OGG1* genotyping were successfully carried out for 145 out of 175 cases, and 329 out of 350 controls.

**Table 4** Gene-environment interactions of *XRCC1* and *OGG1* polymorphisms together with smoking and alcohol drinking on cholangiocarcinoma risk in Khon Kaen, Thailand

| <i>XRCC1</i> | Smoking /<br>Use of alcohol                               | Cases | Controls | OR*  | 95% CI        | P-value       | <i>OGG1</i>  | Smoking /<br>Use of alcohol                               | Cases | Controls | OR*  | 95% CI        | P-value       |
|--------------|-----------------------------------------------------------|-------|----------|------|---------------|---------------|--------------|-----------------------------------------------------------|-------|----------|------|---------------|---------------|
|              |                                                           | n     | n        |      |               |               |              |                                                           | n     | n        |      |               |               |
| <b>G399A</b> | <b>All cigarettes smoking</b>                             |       |          |      |               | <i>0.87</i> † | <b>C326G</b> | <b>All cigarettes smoking</b>                             |       |          |      |               | <i>0.54</i> † |
| GG           | Non-smoker                                                | 22    | 71       | 1.0  |               |               | CC           | Non-smoker                                                | 14    | 55       | 1.0  |               |               |
| GA           | Non-smoker                                                | 48    | 99       | 1.5  | 0.82 to 2.79  | 0.18          | CG           | Non-smoker                                                | 49    | 122      | 1.5  | 0.77 to 2.99  | 0.22          |
| AA           | Non-smoker                                                | 2     | 11       | 0.6  | 0.11 to 2.74  | 0.47          | GG           | Non-smoker                                                | 1     | 1        | —    | —             | —             |
| GG           | Smoker                                                    | 40    | 78       | 2.8  | 1.30 to 5.91  | 0.01          | CC           | Smoker                                                    | 20    | 40       | 3.1  | 1.17 to 8.38  | 0.02          |
| GA           | Smoker                                                    | 46    | 70       | 3.4  | 1.60 to 7.28  | 0.001         | CG           | Smoker                                                    | 60    | 107      | 4.3  | 1.79 to 10.21 | 0.001         |
| AA           | Smoker                                                    | 2     | 10       | 1.2  | 0.21 to 6.29  | 0.86          | GG           | Smoker                                                    | 1     | 4        | 1.5  | 0.14 to 15.44 | 0.74          |
| <b>G399A</b> | <b>Units of alcohol per month of all alcohol drinking</b> |       |          |      |               | <i>0.80</i> † | <b>C326G</b> | <b>Units of alcohol per month of all alcohol drinking</b> |       |          |      |               | <i>0.74</i> † |
| GG           | Non-drinker                                               | 16    | 83       | 1.0  |               |               | CC           | Non-drinker                                               | 10    | 65       | 1.0  |               |               |
| GA           | Non-drinker                                               | 20    | 33       | 4.4  | 1.81 to 10.83 | 0.001         | CG           | Non-drinker                                               | 9     | 9        | 8.1  | 2.30 to 28.36 | 0.001         |
| AA           | Non-drinker                                               | 26    | 33       | 9.2  | 3.65 to 23.21 | <0.001        | GG           | Non-drinker                                               | 15    | 21       | 8.6  | 2.62 to 28.02 | <0.001        |
| GG           | <14                                                       | 22    | 102      | 1.1  | 0.49 to 2.28  | 0.89          | CC           | <14                                                       | 24    | 130      | 1.3  | 0.55 to 3.20  | 0.52          |
| GA           | <14                                                       | 39    | 35       | 8.8  | 3.76 to 20.71 | <0.001        | CG           | <14                                                       | 46    | 58       | 7.0  | 2.85 to 17.39 | <0.001        |
| AA           | <14                                                       | 33    | 32       | 10.3 | 4.14 to 25.80 | <0.001        | GG           | <14                                                       | 39    | 41       | 11.2 | 4.18 to 30.17 | <0.001        |
| GG           | ≥14                                                       | 1     | 12       | 0.4  | 0.05 to 3.71  | 0.44          | CC           | ≥14                                                       | 0     | 1        | —    | —             | —             |
| GA           | ≥14                                                       | 2     | 3        | 2.8  | 0.31 to 25.41 | 0.36          | CG           | ≥14                                                       | 1     | 1        | 7.7  | 0.29 to 26.73 | 0.22          |
| AA           | ≥14                                                       | 1     | 6        | 2.5  | 0.25 to 23.99 | 0.44          | GG           | ≥14                                                       | 1     | 3        | 6.4  | 0.48 to 86.72 | 0.16          |

\*Crude odds ratio from matched case-control analysis.

†P-value for interaction.

## Funding

This research was supported by the Thailand Research Fund (Research grant No. 540102) and the National Research University Project of Thailand, Office of the Higher Education Commission, through the Center of Excellence in Specific Health Problems in Greater Mekong Sub-region (SHeP-GMS), Khon Kaen University (Research grant No. NRU542005).

**Contributors** NS, SP, CP, TE and SW conceived and designed the research. NS and PC performed the research. NS and SP carried out the analyses. All authors contributed to the writing and revisions of the manuscript and approved the final version.

**Competing interests** No conflicts of competing interest.

**Provenance and peer review** Not commissioned; externally peer reviewed.

**Data sharing statement** No additional data are available.

**Ethics approval** Ethical approval was obtained from the Khon Kaen University Ethics Committee for Human Research (Reference No. HE512053).

## Figure Legends

**Figure 1** Polymorphisms in *XRCC1* G399A and *OGGI* C326G were analyzed using PCR with high resolution melting analysis.

## REFERENCES

1. Ferlay J, Shin HR, Bray F, *et al.* GLOBOCAN 2008 v2.0, Cancer Incidence and Mortality Worldwide: IARC CancerBase No.10 (Internet). Lyon, France: IARC; 2010.  
<http://globocan.iarc.fr> (accessed 27 Mar 2013).
2. Khuhaprema T, Attasara P, Sriplung H, *et al.* *Cancer in Thailand Volume VI, 2004-2006*. Bangkok: NCIB, 2012.
3. Parkin DM, Ohshima H, Srivatanakul P, *et al.* Cholangiocarcinoma: epidemiology, mechanisms of carcinogenesis and prevention. *Cancer Epidemiol Biomarkers Prev* 1993;2:537–44.
4. Stern MC, Conti DV, Siegmund KD, *et al.* DNA repair single-nucleotide polymorphisms in colorectal cancer and their role as modifiers of the effect of cigarette smoking and alcohol in the Singapore Chinese Health Study. *Cancer Epidemiol Biomarkers Prev* 2007;16:2363–72.
5. Huang WY, Gao YT, Rashid A, *et al.* Selected base excision repair gene polymorphisms and susceptibility to biliary tract cancer and biliary stones: a population-based case-control study in China. *Carcinogenesis* 2008;29:100–5.
6. Zhang M, Huang WY, Andreotti G, *et al.* Variants of DNA repair genes and the risk of biliary tract cancers and stones: a population-based study in China. *Cancer Epidemiol Biomarkers Prev* 2008;17:2123–7.
7. Srivastava A, Srivastava K, Pandey SN, *et al.* Single-nucleotide polymorphisms of DNA repair genes *OGG1* and *XRCC1*: association with gallbladder cancer in North Indian population. *Ann Surg Oncol* 2009;16:1695–703.

- 1  
2  
3 8. Thanan R, Murata M, Pinlaor S, *et al.* Urinary 8-oxo-7,8-dihydro-2'-deoxyguanosine in  
4 patients with parasite infection and effect of antiparasitic drug in relation to  
5  
6 cholangiocarcinogenesis. *Cancer Epidemiol Biomarkers Prev* 2008;17:518–24.  
7
- 8  
9  
10 9. Dechakhamphu S, Pinlaor S, Sitthithaworn P, *et al.* Lipid peroxidation and etheno DNA  
11  
12 adducts in white blood cells of liver fluke-infected patients: protection by plasma alpha-  
13  
14 tocopherol and praziquantel. *Cancer Epidemiol Biomarkers Prev* 2010;19:310–8.  
15
- 16  
17  
18 10. Zeng L, You G, Tanaka H, *et al.* Combined effects of polymorphisms of DNA-repair protein  
19  
20 genes and metabolic enzyme genes on the risk of cholangiocarcinoma. *Jpn J Clin Oncol*  
21  
22 2013;43: 1190–4.  
23
- 24  
25  
26 11. Songserm N, Promthet S, Sithithaworn P, *et al.* *MTHFR* Polymorphisms and *Opisthorchis*  
27  
28 *viverrini* Infection: a Relationship with Increased Susceptibility to Cholangiocarcinoma in  
29  
30 Thailand. *Asian Pac J Cancer Prev* 2011;12:1341–5.  
31
- 32  
33  
34 12. Songserm N, Promthet S, Sithithaworn P, *et al.* Risk factors for cholangiocarcinoma in high-  
35  
36 risk area of Thailand: Role of lifestyle, diet and methylenetetrahydrofolate reductase  
37  
38 polymorphisms. *Cancer Epidemiol* 2012;36:e89–94.  
39
- 40  
41  
42 13. Kosti O, Byrne C, Meeker KL, *et al.* Mutagen sensitivity, tobacco smoking and breast cancer  
43  
44 risk: a case-control study. *Carcinogenesis* 2010;31:654–9.  
45
- 46  
47  
48 14. Rouissi K, Ouerhani S, Hamrita B, *et al.* Smoking and polymorphisms in xenobiotic  
49  
50 metabolism and DNA repair genes are additive risk factors affecting bladder cancer in  
51  
52 Northern Tunisia. *Pathol Oncol Res* 2011;17:879–86.  
53
- 54  
55  
56 15. Mena S, Ortega A, Estrela JM. Oxidative stress in environmental-induced carcinogenesis.  
57  
58 *Mutat Res* 2009;674:36–44.  
59
- 60  
61  
62 16. Pelucchi C, Tramacere I, Boffetta P, *et al.* Alcohol consumption and cancer risk. *Nutr*  
63  
64 *Cancer* 2011;63:983–90.



- 1  
2  
3 17. Parkin DM, Srivatanakul P, Khlat M, *et al.* Liver cancer in Thailand. I. A case-control study  
4  
5 of cholangiocarcinoma. *Int J Cancer* 1991;48:323–8.  
6  
7
- 8 18. Chernrungrroj G. Risk factors for cholangiocarcinoma: a case-control study (dissertation).  
9  
10 Connecticut: Yale University, 2000.  
11
- 12 19. Honjo S, Srivatanakul P, Sriplung H, *et al.* Genetic and environmental determinants of risk  
13 for cholangiocarcinoma via *Opisthorchis viverrini* in a densely infested area in Nakhon  
14 Phanom, northeast Thailand. *Int J Cancer* 2005;117:854–60.  
15  
16  
17
- 18 20. Poomphakwaen K, Promthet S, Kamsa-Ard S, *et al.* Risk factors for cholangiocarcinoma in  
19 Khon Kaen, Thailand: a nested case-control study. *Asian Pac J Cancer Prev* 2009;10:251–8.  
20  
21  
22
- 23 21. Chalasani N, Baluyut A, Ismail A, *et al.* Cholangiocarcinoma in patients with primary  
24 sclerosing cholangitis: a multicenter case-control study. *Hepatology* 2000;31:7–11.  
25  
26  
27
- 28 22. Sriamporn S, Parkin DM, Pisani P, *et al.* A prospective study of diet, lifestyle, and genetic  
29 factors and the risk of cancer in Khon Kaen Province, northeast Thailand: description of the  
30 cohort. *Asian Pac J Cancer Prev* 2005;6:295–303.  
31  
32  
33
- 34 23. Kietthubthew S, Sriplung H, Au WW, *et al.* Polymorphism in DNA repair genes and oral  
35 squamous cell carcinoma in Thailand. *Int J Hyg Environ Health* 2006;209:21–9.  
36  
37  
38
- 39 24. Sangrajrang S, Schmezer P, Burkholder I, *et al.* Polymorphisms in three base excision repair  
40 genes and breast cancer risk in Thai women. *Breast Cancer Res Treat* 2008;111:279–88.  
41  
42  
43
- 44 25. Settheetham-Ishida W, Yuenyao P, Natphopsuk S, *et al.* Genetic Risk of DNA Repair Gene  
45 Polymorphisms (*XRCC1* and *XRCC3*) for High Risk Human Papillomavirus Negative  
46 Cervical Cancer in Northeast Thailand. *Asian Pac J Cancer Prev* 2011;12:963–6.  
47  
48  
49
- 50 26. Klinchid J, Chewaskulyoung B, Saeteng S, *et al.* Effect of combined genetic polymorphisms  
51 on lung cancer risk in northern Thai women. *Cancer Genet Cytogenet* 2009;195:143–9.  
52  
53  
54  
55  
56  
57  
58  
59  
60

- 1  
2  
3 27. Mohrenweiser HW, Wilson DM 3rd, Jones IM. Challenges and complexities in estimating  
4 both the functional impact and the disease risk associated with the extensive genetic variation  
5 in human DNA repair genes. *Mutat Res* 2003;526:93–125.  
6  
7  
8  
9  
10 28. Lunn RM, Langlois RG, Hsieh LL, *et al.* *XRCC1* polymorphisms: effects on aflatoxin B1-  
11 DNA adducts and glycophorin A variant frequency. *Cancer Res* 1999;59:2557–61.  
12  
13 29. Duell EJ, Millikan RC, Pittman GS, *et al.* Polymorphisms in the DNA repair gene *XRCC1*  
14 and breast cancer. *Cancer Epidemiol Biomarkers Prev* 2001;10:217–22.  
15  
16  
17  
18  
19 30. Matullo G, Guarrera S, Carturan S, *et al.* DNA repair gene polymorphisms, bulky DNA  
20 adducts in white blood cells and bladder cancer in a case-control study. *Int J Cancer*  
21  
22 2001;92:562–7.  
23  
24  
25  
26  
27 31. Vodicka P, Stetina R, Polakova V, *et al.* Association of DNA repair polymorphisms with  
28 DNA repair functional outcomes in healthy human subjects. *Carcinogenesis* 2007;28:657–  
29  
30  
31  
32  
33  
34  
35  
36  
37  
38  
39  
40  
41  
42  
43  
44  
45  
46  
47  
48  
49  
50  
51  
52  
53  
54  
55  
56  
57  
58  
59  
60

1  
2  
3  
4  
5  
6  
7  
8  
9  
10  
11  
12  
13  
14  
15  
16  
17  
18  
19  
20  
21  
22  
23  
24  
25  
26  
27  
28  
29  
30  
31  
32  
33  
34  
35  
36  
37  
38  
39  
40  
41  
42  
43  
44  
45  
46  
47  
48  
49  
50  
51  
52  
53  
54  
55  
56  
57  
58  
59  
60



Figure 1 Polymorphisms in XRCC1 G399A and OGG1 C326G were analyzed using PCR with high resolution melting analysis.  
122x86mm (300 x 300 DPI)

Review only
